# Supplementary material for: Quantifying BTEX in aqueous solutions with potentially interfering hydrocarbons using a partially selective sensor array
Source: Royal Society of Chemistry journal article supplement (doi:10.1039/c5an00223k), 2015-01-01
Supplement: c5an00223k1.csv [file c5an00223k1.csv]

BT	BPall	TT	TPall	ET	EPall	XT	XPall	NT	NPall
84	91.14554425	0	0	0	0	0	0	0	0
84	96.34972875	0	4.487760653	0	0	0	0	0	0
84	99.74331551	0	0	0	0	0	0	0	0
84	84.48124812	0	0	0	0	0	0	0	0
84	65.98130813	0	2.152842498	0	0	0	0	0	0
84	74.9490657	0	2.433179724	0	0	0	0	0	0
84	72.94911111	0	0.095735422	0	0	0	0	0	0
84	77.92608364	0	17.98742138	0	0	0	0	0	0
84	88.51975524	0	0.203139428	0	0	0	0	0	0
84	82.46790123	0	2.426470588	0	0	0	0	0	0
84	87.30027149	0	0.203892493	0	0	0	0	0	0
84	92.12978339	0	0	0	0	0	0	0	0
120	96.18951175	0	0	0	0	0	0	0	0
120	112.5318394	0	0	0	0	0	0	0	0
120	109.4213805	0	0	0	0	0	0	0	0
120	107.4338605	0	0	0	0	0	0	0	0
120	106.8765877	0	0	0	0	0	0	0	0
120	84.21333333	0	0	0	0	0	0	0	0
120	101.8358156	0	1.993097498	0	0	0	0	0	0
120	97.61344383	0	0	0	0	0	0	0	0
120	95.95919854	0	4.791288566	0	0	0	0	0	0
120	104.6367201	0	0	0	0	0	0	0	0
120	103.9705244	0	0.09936766	0	0	0	0	0	0
120	99.22647154	0	0	0	0	0	0	0	0
0	9.702064632	100	78.52914743	97	92.53136807	96	92.13646803	94	95.5509039
0	6.459914452	100	87.17656012	97	94.0564114	96	94.56303224	94	95.03250377
0	5.797340272	100	90.25252936	97	94.56988582	96	91.84523144	94	96.08426501
0	2.349539102	100	97.65429248	97	96.22615975	96	95.35409035	94	94.162936
0	1.151339004	100	97.03002375	97	96.35176089	96	95.57017381	94	94.25626327
0	2.419131783	100	96.11545624	97	95.55420142	96	94.91855993	94	94.19388298
0	2.695279035	100	98.45051898	97	96.28242152	96	95.58563113	94	94.26359223
0	2.889800118	100	92.64117821	97	95.72337093	96	94.64181314	94	94.31179118
0	2.182441574	100	95.31946023	97	95.98452275	96	95.36007498	94	94.20508708
0	1.475994695	100	98.43270928	97	96.30011862	96	95.29955072	94	94.06016484
0	4.816651865	100	58.87086733	97	95.98446303	96	95.38793265	94	94.32670367
0	4.027638266	100	92.92780839	97	95.61803351	96	94.01819143	94	95.25367107
98	93.60786758	98	96.84912593	0	5.69447889	94	74.13537383	0	2.689031079
98	94.06850565	98	93.23278186	0	13.62337778	94	84.31865606	0	0.92242535
98	96.0312387	98	96.86626617	0	13.03941504	94	80.97805281	0	1.577478287
98	96.62166512	98	97.01509069	0	6.978461081	94	88.38142941	0	0.823586041
98	97.24515096	98	97.52699614	0	4.77275612	94	86.59436407	0	0.957210402
98	93.30422772	98	95.67846058	0	32.5528992	94	83.77468613	0	1.168371546
98	96.16890432	98	96.03189815	0	25.01103182	94	83.01053943	0	0.662080336
98	97.13272924	98	97.09038012	0	7.154679429	94	79.95663185	0	1.804637282
98	96.40117981	98	94.00332098	0	11.96823789	94	78.42693466	0	6.481352201
98	96.23089133	98	97.13339438	0	8.657233581	94	71.90603579	0	1.644544025
98	91.89108986	98	93.15775916	0	21.27706997	94	47.83953382	0	1.270026525
98	85.86040909	98	93.79142501	0	9.712470024	94	76.84721968	0	4.607706422
51	50.91836257	48	47.07266017	47	46.31433692	47	49.92565104	44	49.75569395
51	51.20358519	48	47.66177261	47	46.6687293	47	47.02804805	44	45.38260482
51	51.23798165	48	48.33548773	47	44.25108831	47	47.66879056	44	51.25246971
51	51.17548747	48	47.84862832	47	47.20565954	47	48.62630281	44	43.90414788
51	51.33542789	48	48.67393351	47	45.86304805	47	47.55408325	44	45.86410256
51	54.53497717	48	46.63927045	47	48.40902031	47	48.67913998	44	36.50178951
51	51.93592417	48	47.27077982	47	49.98377976	47	47.80449859	44	44.30104648
51	51.41961693	48	47.92768769	47	47.39732906	47	47.50427948	44	45.65881279
51	50.73014842	48	48.83421053	47	45.78325617	47	49.74545739	44	46.80601469
51	51.59043427	48	47.99387939	47	46.53797915	47	47.43455838	44	45.40617778
51	54.46836132	48	46.48098131	47	53.93825338	47	51.63231707	44	44.05369871
51	52.05460465	48	47.45367232	47	47.11007788	47	48.60880783	44	44.96749924
0	26.75425926	0	11.38512241	77	81.15828853	78	84.33238434	0	0.342773135
0	11.43527479	0	4.974940263	77	79.16481481	78	81.2438184	0	2.097478475
0	37.35146386	0	3.860414802	77	86.74484821	78	86.96589394	0	2.115588878
0	19.02986301	0	4.812469586	77	78.43675373	78	81.10891089	0	3.825168815
0	20.60595673	0	2.185880048	77	81.37383595	78	82.84511051	0	3.901623084
0	20.83197341	0	4.882692868	77	76.58874781	78	79.21443253	0	10.67598306
0	16.9015791	0	4.265347157	77	76.87892935	78	79.19866608	0	3.768581181
0	36.36126005	0	2.933170225	77	82.50782074	78	82.62559363	0	3.01489555
0	50.17709843	0	7.684120618	77	85.17017291	78	90.25116355	0	2.359573503
0	23.73312463	0	12.60326888	77	76.38994565	78	79.19622783	0	4.871620795
0	39.56800662	0	2.314833486	77	85.15226582	78	85.01434353	0	3.590491356
0	37.40075893	0	22.1428125	77	71.14422043	78	75.98199216	0	11.25876411
110	88.47985481	0	15.15135417	100	94.66654534	100	94.28743374	0	3.936525476
110	104.6382397	0	4.75854109	100	98.45561562	100	98.07050338	0	3.597851388
110	103.6626708	0	7.178870422	100	89.89136321	100	96.21256387	0	3.851865332
110	102.6070845	0	9.130367359	100	96.55641481	100	97.2946256	0	4.262354312
110	101.4024302	0	6.957243816	100	96.54913949	100	97.25103047	0	4.863278887
110	103.7964936	0	6.742769277	100	89.82897884	100	92.76257256	0	13.16017001
110	41.88384496	0	5.73987157	100	87.9719007	100	87.97986369	0	0.211151079
110	80.11691589	0	8.555595238	100	95.80765685	100	95.59887057	0	2.846503179
110	44.88713041	0	5.111231231	100	88.05808311	100	87.67589176	0	0.925852783
110	73.08406775	0	7.605883243	100	94.63658429	100	94.80145929	0	4.119354839
110	48.41059748	0	8.337988748	100	85.86483648	100	86.60830275	0	14.13204225
110	44.14143689	0	18.74288812	100	76.36261502	100	75.17106918	0	16.19361511
91	88.32640771	87	87.36943688	0	0	0	0.179334554	0	0
91	81.33809524	87	83.71806909	0	0.162210339	0	0.192910448	0	0
91	82.48175934	87	81.58145018	0	0.38277087	0	7.265120594	0	0
91	90.35075556	87	86.96210721	0	0	0	0.034057971	0	0
91	88.87996422	87	85.5055157	0	0.059292035	0	0.69676259	0	0
91	83.38474702	87	76.17303523	0	0.120829576	0	1.041207349	0	0
91	87.12039891	87	87.18937266	0	0	0	0	0	0
91	87.88370268	87	78.67977064	0	0.331210191	0	0.438024231	0	0
91	86.27310536	87	84.05731814	0	0.079964851	0	0.122351885	0	0
91	88.61459246	87	75.52559415	0	0.228230981	0	0.017231897	0	0
91	89.77560788	87	86.98515343	0	0	0	0.017295308	0	0
91	85.71351393	87	85.55178571	0	0.061524334	0	0.086876155	0	0
91	92.13766098	88	88.22884557	84	66.09671623	0	9.737743252	0	3.741511194
91	90.29849612	88	87.34162194	84	64.91890459	0	19.39408602	0	2.63844464
91	91.52146098	88	88.74083411	84	73.73567173	0	7.653124038	0	0.280545455
91	91.33472348	88	88.59253643	84	73.48218286	0	12.77803101	0	0.362799263
91	86.6710444	88	85.34719751	84	75.56199753	0	10.49979222	0	5.22831235
91	91.64258103	88	88.641527	84	76.70002945	0	11.92236802	0	1.096489649
91	91.81478593	88	88.4423711	84	78.61810427	0	13.49530965	0	0.107763401
91	91.49120994	88	89.55378995	84	71.86780926	0	32.99864783	0	0.047402005
91	90.77357839	88	88.20667915	84	77.0590463	0	25.33135985	0	0.374762808
91	91.47442068	88	88.4639833	84	71.29918446	0	3.677083333	0	0.069316081
91	90.60358519	88	88.26834382	84	73.59814815	0	4.436783626	0	0.444300278
91	90.79058107	88	87.0461504	84	72.63361456	0	3.045883257	0	4.153382762
89	85.88352158	0	2.532053654	82	83.41766883	79	80.5130844	100	99.44385568
89	73.98885894	0	17.30562481	82	85.88673226	79	74.19540335	100	99.66384335
89	85.36768367	0	5.565976694	82	82.21478593	79	80.67436015	100	99.02123457
89	84.66142604	0	5.836348485	82	83.16505525	79	81.97001803	100	99.52118545
89	84.45771056	0	5.461806798	82	82.6135023	79	80.50548225	100	99.80978456
89	80.8363366	0	18.28305384	82	84.72393911	79	80.56809015	100	98.91375986
89	84.29559513	0	15.73932898	82	84.10299445	79	80.39358519	100	99.6419244
89	81.42546851	0	23.82683109	82	82.41486566	79	80.39316914	100	97.91881246
89	84.96162504	0	6.686831468	82	82.84097039	79	80.99347826	100	98.89336449
89	86.08518351	0	7.015972851	82	83.40194593	79	80.41668207	100	99.5033455
89	84.06548947	0	16.93010753	82	85.07242009	79	81.16174617	100	98.8020402
89	80.55477477	0	21.27861862	82	86.06926857	79	80.23164557	100	99.87952899
90	80.12431444	87	80.43803299	0	2.72108288	79	81.03944844	100	100.9393201
90	88.80646565	87	82.6094381	0	1.345610625	79	76.80522412	100	99.86904551
90	89.19038577	87	80.4967128	0	1.907725773	79	79.04810536	100	98.64753925
90	88.49368132	87	85.71305732	0	1.535619469	79	79.04355132	100	98.42023483
90	85.89025896	87	82.87422587	0	3.322439988	79	81.43069936	100	101.45872
90	89.40859232	87	85.7902752	0	0.54251607	79	79.09641295	100	100.0748185
90	89.49799636	87	85.51108563	0	2.280904675	79	78.83190433	100	98.61328967
90	86.05986862	87	81.43151769	0	4.005045203	79	79.57737882	100	100.3880866
90	84.65659226	87	83.20367133	0	7.665444641	79	79.08201717	100	98.80672166
90	85.75239394	87	83.50511131	0	18.01056946	79	79.91279353	100	99.67365492
90	80.601017	87	80.36965538	0	13.81084777	79	79.26336649	100	102.4026235
90	61.00119048	87	70.75016398	0	19.74773607	79	80.22740168	100	107.1364452
110	103.6286738	0	21.77929522	0	3.220188849	0	1.522782875	80	84.52048944
110	105.0768349	0	11.73842121	0	2.869535755	0	0.312171629	80	80.08306306
110	107.2701149	0	1.756969697	0	1.356331218	0	0.193681319	80	79.53755931
110	108.2485391	0	2.944769504	0	1.592913625	0	0.70888055	80	80.1973652
110	108.5634732	0	1.365188909	0	1.410143062	0	0.265168869	80	80.11331845
110	109.7476211	0	1.7887678	0	1.440214761	0	0.084665483	80	79.49642643
110	108.6655702	0	5.233115265	0	2.826103856	0	0.451546392	80	80.39167397
110	109.1456752	0	6.931785392	0	2.786893059	0	0.196545285	80	80.03360434
110	107.1528477	0	14.49595238	0	1.438863287	0	0.311682243	80	81.10697566
110	102.5669497	0	4.774892175	0	0.851792768	0	0.298922801	80	81.67533923
110	108.3745614	0	4.240777577	0	1.158125577	0	0.685336976	80	80.8987963
110	108.1803315	0	3.427886323	0	0.698339483	0	0.038461538	80	80.84968944
100	92.89936823	0	0.580553023	91	86.04361511	0	0.307971014	0	0
100	99.02096824	0	0.491418248	91	90.3706994	0	0.133030027	0	0
100	97.97148923	0	0.526051925	91	88.34393939	0	0.355048662	0	0
100	94.51277329	0	0.879564193	91	88.9062276	0	1.46316726	0	0
100	97.021155	0	0.082673703	91	84.96778281	0	0.263542562	0	0
100	94.97142857	0	6.430441264	91	89.59722992	0	0.176549094	0	0.436781609
100	98.6271149	0	0.511091019	91	88.87139349	0	0.694751381	0	0
100	97.80367945	0	3.098295964	91	89.42051046	0	0	0	0
100	96.29374817	0	0.157751587	91	90.64661984	0	0.254195804	0	0
100	95.35786026	0	0.266697164	91	84.90352505	0	0.529136691	0	0
100	98.76220109	0	3.019285274	91	88.1978831	0	0.96627165	0	0.486850153
100	96.89095415	0	0.758018328	91	87.26168909	0	0.549816682	0	0
0	38.49813797	0	0.556238532	67	49.39960855	0	37.33505491	0	0
0	26.6	0	0	67	64.25236173	0	28.55749331	0	0
0	18.65666667	0	1.96087344	67	66.11402191	0	4.679466427	0	0
0	41.11456994	0	2.378006231	67	47.25799211	0	18.06569264	0	0
0	17.3664249	0	3.824142273	67	44.58048893	0	19.28870574	0	0
0	8.113849093	0	1.032460102	67	64.16831502	0	5.743318386	0	0
0	5.580845771	0	0	67	66.62251082	0	3.401681957	0	0
0	8.251919102	0	0.676526661	67	61.88366788	0	7.315582035	0	0
0	18.13625078	0	0.063269231	67	68.21151677	0	17.75792181	0	0
0	19.68327109	0	0	67	47.4025722	0	19.75514795	0	0
0	4.186147186	0	0.139226692	67	65.65183001	0	14.11455153	0	0
0	9.441833637	0	0.169591712	67	68.06113054	0	6.75415937	0	0
0	22.22398782	83	63.65486685	76	76.29619666	75	73.38431373	0	2.060279805
0	37.87631336	83	74.14365959	76	75.25162488	75	74.06675659	0	1.856643357
0	16.12522483	83	68.88173136	76	72.29309779	75	67.96826464	0	4.94336719
0	12.5208912	83	70.64326303	76	75.55794643	75	74.12242424	0	1.601934119
0	20.8085076	83	73.69642748	76	73.9764005	75	72.47985075	0	2.707134071
0	11.32837515	83	68.14631873	76	75.89484312	75	74.69365079	0	0.68627451
0	17.1434967	83	79.47301145	76	74.9023915	75	73.63598485	0	1.462582469
0	17.1951647	83	75.50040724	76	68.22510783	75	64.15773321	0	13.264375
0	7.543667861	83	81.22918139	76	75.86404576	75	75.51312724	0	0.258021309
0	10.03943765	83	80.09231011	76	76.03548339	75	74.07886931	0	1.704886399
0	25.07563119	83	73.15552544	76	65.45333333	75	65.04389752	0	11.96992164
0	47.74946381	83	69.18098214	76	76.41946152	75	72.66225861	0	8.161526901
51	45.47117278	50	59.3266151	44	48.80509302	44	46.05377799	52	41.20611262
51	42.12416296	50	61.08609904	44	47.63044733	44	47.63523245	52	37.24628497
51	41.61314864	50	59.99704403	44	51.02402578	44	45.74232666	52	39.86973435
51	48.44453007	50	57.30837111	44	46.47146739	44	41.43390339	52	53.40426497
51	44.91407027	50	56.98925823	44	47.7690367	44	46.78400061	52	45.63963396
51	46.4244801	50	56.52678414	44	49.8443171	44	48.09688153	52	38.86036364
51	49.76854224	50	52.38404508	44	44.36214689	44	40.93848765	52	53.93040261
51	49.56191974	50	52.7385083	44	44.59486594	44	40.8713964	52	52.52506105
51	51.92231766	50	51.56663563	44	46.60647724	44	43.60668771	52	47.19277389
51	48.71440201	50	66.70245408	44	41.44886775	44	38.94442935	52	51.66076541
51	43.87655502	50	62.8448867	44	61.1943067	44	54.41160527	52	38.30478563
51	51.04104797	50	60.55342288	44	52.52474657	44	45.59746156	52	42.14446466
0	6.680655035	94	88.05004621	0	7.583272059	88	81.27542677	110	107.5368406
0	2.010676157	94	93.33894217	0	2.368962895	88	86.72265416	110	108.1364919
0	3.030037488	94	92.72683824	0	1.374885057	88	85.66133627	110	107.6670191
0	2.128360215	94	92.7444842	0	1.792668448	88	81.86895455	110	98.74069188
0	4.807937956	94	90.13681	0	1.529844961	88	85.68511959	110	105.5691079
0	3.59950761	94	92.59533703	0	1.377042338	88	84.67100149	110	109.7505915
0	30.16525372	94	91.52532253	0	17.22174672	88	73.13076104	110	97.59385965
0	1.58784153	94	93.57528187	0	2.919238775	88	86.81430718	110	109.5127424
0	2.364622222	94	92.52505086	0	5.582949853	88	86.26748682	110	105.911271
0	19.58109153	94	90.50382344	0	13.88195092	88	87.04544082	110	110.9468528
0	5.509163592	94	92.81841017	0	5.584307458	88	85.61173454	110	103.2201401
0	5.167469311	94	91.90851648	0	9.728557964	88	84.40654596	110	107.7077537
100	72.90783767	0	15.56660839	0	24.77374512	79	59.03131219	0	0
100	55.31736353	0	15.95763299	0	25.16852363	79	60.88184664	0	0
100	65.65039718	0	51.74797194	0	14.04537879	79	64.89230072	0	0
100	77.7484333	0	9.27471893	0	22.73277087	79	62.37151145	0	0
100	34.37702265	0	34.14027027	0	32.95914913	79	44.13339286	0	0
100	83.24471169	0	0.294594595	0	9.90318737	79	69.81938951	0	0.249332146
100	75.63804247	0	6.105969697	0	6.273342021	79	73.73313492	0	0
100	84.00077519	0	3.837575211	0	7.055112652	79	71.93683815	0	0
100	62.46031463	0	2.05334472	0	13.53445455	79	58.81166521	0	0
100	75.62738095	0	6.938090909	0	7.731852829	79	72.45903015	0	0
100	75.81705918	0	2.805470852	0	8.641173835	79	72.23565684	0	0
100	24.07211961	0	18.62930233	0	36.73910438	79	51.93772093	0	0
0	24.9786116	0	10.54835316	93	88.41250743	94	92.37606061	120	109.3279794
0	5.157876106	0	13.54125413	93	85.512968	94	92.88054012	120	117.0329761
0	21.76657509	0	16.64685945	93	63.11942975	94	93.50090852	120	113.630972
0	10.57394881	0	4.160345359	93	80.14928363	94	92.82981005	120	115.3079804
0	41.46233062	0	12.6931736	93	90.0553092	94	90.54690498	120	113.9423933
0	13.40838593	0	8.158386998	93	92.1742662	94	93.30805278	120	106.7729782
0	6.506444444	0	9.829053237	93	85.96146029	94	92.27800623	120	115.273991
0	5.284551056	0	3.054392995	93	90.30218855	94	92.47433155	120	118.9788652
0	1.76142596	0	4.512998267	93	91.63922872	94	93.32361762	120	118.5444444
0	2.565372766	0	7.748720265	93	92.17854245	94	92.30846366	120	119.0787268
0	16.11198469	0	6.491935484	93	91.13805947	94	90.61302647	120	119.2483871
0	15.95247245	0	26.78178694	93	76.3636791	94	87.7048529	120	115.5969391
0	2.402502317	0	0.14977518	0	10.09734675	0	0.245630175	0	0
0	21.71624728	0	65.40597303	0	0	0	0	0	0
0	11.55972101	0	0.509731233	0	0	0	0	0	0
0	3.694444444	0	0	0	0	0	0	0	0
0	29.01433036	0	0.015789474	0	0	0	0	0	0
0	4.947584541	0	0.198735321	0	0	0	0	0	0
0	19.57019827	0	0	0	0	0	0	0	0
0	1.661777394	0	0	0	0	0	0	0	0
0	24.51218182	0	0	0	0	0	0	0	0
0	53.54125	0	0.100273473	0	0	0	0	0	0
0	1.982633053	0	0.036795113	0	0	0	0	0	0
0	21.35835567	0	0.103675778	0	0	0	0	0	0
100	82.91619825	93	49.82881434	92	58.49019878	93	90.79977974	0	37.17990196
100	93.78540881	93	80.58287827	92	70.61462014	93	87.16279492	0	44.59594074
100	88.24690722	93	83.5889082	92	80.64424819	93	91.04652119	0	14.53150766
100	91.92613535	93	89.2149037	92	82.41949881	93	90.85835621	0	9.445840814
100	73.10502242	93	85.16433426	92	86.57807018	93	90.05510511	0	0.876725146
100	81.85617342	93	87.37055961	92	84.53016802	93	90.3287651	0	3.066784141
100	86.97712874	93	88.86819315	92	85.8630012	93	89.56669747	0	7.435870556
100	94.71845617	93	89.76453453	92	88.27947795	93	89.77952292	0	6.918987342
100	85.13809944	93	86.50494959	92	87.26642134	93	89.86833925	0	1.563128159
100	87.62183379	93	85.47598344	92	83.17156953	93	86.62034574	0	3.43807311
100	83.86038354	93	86.62277306	92	80.57214264	93	83.37793279	0	7.917894114
100	86.30535714	93	86.32752502	92	87.23569054	93	84.33675368	0	14.42000636
100	96.79802709	0	2.837549649	0	24.04437406	98	93.62980122	120	116.6744873
100	97.84538944	0	3.205037665	0	23.58874419	98	90.75083111	120	117.124747
100	99.39981718	0	2.354534425	0	32.78311728	98	93.4921142	120	113.21224
100	98.85984073	0	0.6259447	0	12.46313131	98	94.69991039	120	119.7171254
100	90.28915936	0	4.960435169	0	22.52795943	98	89.1200674	120	97.92637496
100	97.38208933	0	4.159231226	0	11.31020102	98	90.77023916	120	118.5040696
100	96.54050477	0	7.062899851	0	7.971868062	98	85.50044424	120	118.3252968
100	97.97281433	0	4.837902753	0	9.353061224	98	91.70733032	120	116.307671
100	97.73198441	0	6.473439394	0	4.796071734	98	93.80760588	120	118.7313507
100	91.00065509	0	10.38032023	0	15.94883287	98	90.61684701	120	105.6203754
100	98.33977032	0	2.634456424	0	14.16111111	98	95.63742479	120	119.9778385
100	98.77881254	0	4.240105105	0	11.92675198	98	94.8081982	120	118.0766402
0	70.28442164	110	79.05012438	0	14.3433363	0	9.895668715	160	103.8537269
0	69.67646465	110	79.42826287	0	26.32098655	0	4.295702775	160	115.5603189
0	12.49001488	110	106.7721874	0	0.425388449	0	0.406631763	160	148.402104
0	7.986557178	110	104.3194216	0	1.365947242	0	1.233638026	160	148.8349439
0	9.73788013	110	108.8491711	0	0.161100917	0	0.312262357	160	155.5874848
0	9.34303438	110	106.3407899	0	4.61749409	0	2.094696296	160	140.1870501
0	40.49668728	110	99.77322481	0	2.337749546	0	2.292485189	160	131.5721684
0	21.78967961	110	108.1982786	0	0.316635945	0	0.469682689	160	146.5809142
0	44.88559633	110	106.8441558	0	0.456772247	0	0.77153296	160	147.6318323
0	17.76991983	110	106.018198	0	0.650134168	0	0.773560049	160	147.7304766
0	14.86037002	110	97.28254042	0	7.653321523	0	7.876585821	160	116.4152605
0	53.88614315	110	97.70519248	0	1.433058356	0	1.116891689	160	139.759528
0	7.348655183	110	106.4523373	110	103.7140274	0	4.01265653	100	96.12106545
0	8.738741621	110	106.8681567	110	105.4213589	0	0.564972777	100	98.17256637
0	7.901914515	110	107.5296089	110	108.2075908	0	0.135454545	100	98.56941176
0	10.07202216	110	100.447494	110	92.15058534	0	10.66313087	100	97.7316092
0	29.35784596	110	92.85636364	110	109.1969557	0	1.134859474	100	97.81913188
0	21.48315135	110	105.5893297	110	101.6414619	0	1.042152466	100	90.98055305
0	6.885757302	110	106.8565455	110	107.4527354	0	8.308452594	100	95.71779935
0	10.26225947	110	107.4833779	110	108.4547575	0	1.034521576	100	99.36186186
0	51.1570059	110	100.6503277	110	109.3144712	0	0.815700935	100	97.72791255
0	17.22210947	110	106.8447326	110	108.1435039	0	1.686294643	100	99.69159213
0	36.68664249	110	92.87537704	110	107.4975098	0	0.762662338	100	99.0601137
0	27.78983076	110	103.0921577	110	104.3748644	0	14.23391967	100	100.8205839
0	3.760114734	0	5.442164734	0	12.85457254	94	85.00954266	0	0
0	3.813232035	0	1.572587917	0	3.062601626	94	87.72035836	0	0
0	5.372292419	0	6.077792553	0	0.702816901	94	70.58875228	0	0
0	4.796092362	0	1.770327381	0	3.395696539	94	91.26779789	0	0
0	1.394345238	0	1.602823315	0	0.627981651	94	76.80299374	0	0
0	7.152968842	0	5.716620669	0	6.618112014	94	65.73197553	0	0
0	1.786467617	0	1.217712014	0	0.390629597	94	84.3172393	0	0
0	9.263636364	0	5.69431988	0	2.015410959	94	75.67493023	0	0
0	2.29787234	0	1.261942959	0	0.690083259	94	90.36952599	0	0
0	0.180018002	0	0.280758684	0	1.606945766	94	81.08137435	0	0
0	25.69630298	0	8.016291161	0	4.396178718	94	78.11288991	0	0
0	1.517922272	0	3.286251146	0	1.758587786	94	33.23995187	0	0
98	96.00632184	92	83.71557872	92	83.04761035	92	78.99338527	130	118.1782738
98	97.24420357	92	90.00063006	92	89.43208778	92	87.99017467	130	127.1190954
98	96.42565044	92	88.73697822	92	91.46643991	92	91.66255371	130	128.3377421
98	95.53285884	92	91.09204647	92	90.79195101	92	88.34623947	130	128.2405505
98	93.85868217	92	88.7778372	92	91.03307669	92	88.38822243	130	128.574915
98	88.46537421	92	85.67258164	92	86.96217246	92	82.27134183	130	126.4981429
98	96.15147623	92	88.51807832	92	89.86586799	92	89.11360694	130	128.8482302
98	97.03589057	92	88.80608417	92	89.20478593	92	88.15209455	130	126.9836568
98	88.14287029	92	87.03660072	92	90.63660422	92	88.45315107	130	124.7207108
98	86.76683849	92	84.91287462	92	87.28468305	92	83.82535966	130	127.0123063
98	80.09993989	92	87.09897391	92	91.09709233	92	89.63989362	130	128.3976613
98	91.72117486	92	89.77263503	92	90.26764793	92	87.05698925	130	107.8301859
0	3.023363229	92	91.02254717	0	18.35818399	87	68.4280158	0	0
0	1.881790123	92	88.97393776	0	15.21423801	87	72.88754911	0	0
0	0.947237741	92	92.03184034	0	6.158363472	87	77.69905405	0	0
0	2.689346464	92	92.30352941	0	22.92338287	87	62.13109031	0	0
0	0.744844568	92	91.40993994	0	11.55537585	87	77.20596708	0	0
0	0.517436381	92	91.89751966	0	26.75018071	87	66.11058981	0	0
0	0.998484848	92	92.19003559	0	33.99786604	87	50.6826248	0	0
0	1.825891603	92	90.27694936	0	37.23927614	87	53.17525758	0	0.202830189
0	5.406212121	92	85.98277017	0	16.50359813	87	73.8495683	0	0
0	4.963361397	92	89.90038079	0	27.17212363	87	66.34615613	0	0
0	8.456540825	92	82.54191107	0	23.72037534	87	54.98337942	0	0
0	1.893500298	92	90.24872706	0	36.41333631	87	54.55104068	0	0
100	99.33889892	0	1.123274336	94	94.03873371	0	0.80749331	130	129.4505526
100	94.55081301	0	1.684812537	94	85.44940422	0	1.212546468	130	127.605801
100	98.95470282	0	1.103898097	94	92.58910598	0	0.226488095	130	129.3785259
100	99.21362664	0	1.53327126	94	92.41304614	0	2.250717003	130	128.9602504
100	98.68492659	0	1.653202847	94	92.25174962	0	0.466141273	130	129.3986691
100	94.51444342	0	4.929522924	94	89.18686869	0	0.628916741	130	124.9987527
100	95.99415646	0	4.212115621	94	91.40388736	0	1.549147982	130	126.9843884
100	89.99640493	0	7.262082224	94	91.14330911	0	1.254504095	130	112.6043098
100	97.66075798	0	1.301714801	94	89.93731026	0	1.095067546	130	128.8663007
100	93.47522698	0	7.314854071	94	78.75179584	0	6.532229185	130	123.1167902
100	96.25104353	0	1.124715739	94	89.93806016	0	4.14952293	130	127.3472727
100	92.63215504	0	5.550327103	94	90.05902655	0	3.872926026	130	127.826087
0	0.306157784	0	2.033575978	0	2.052900552	0	1.352376514	140	137.7750144
0	8.135608129	0	11.28669098	0	6.168362832	0	13.43299913	140	133.4682632
0	2.320427196	0	3.643105023	0	4.4068455	0	3.755037369	140	132.2319932
0	0.870926422	0	2.500857055	0	1.216425775	0	1.239237738	140	122.2048861
0	2.43067034	0	6.458224163	0	3.298927614	0	3.269771863	140	138.2717961
0	2.17380137	0	4.985707804	0	2.963856847	0	2.386731968	140	134.3404913
0	2.002131603	0	5.176269621	0	2.320664909	0	3.580552995	140	116.7889535
0	0.791002812	0	7.499375	0	5.090747176	0	1.689298893	140	136.5554992
0	0.833935018	0	2.111195815	0	2.040670956	0	4.691043398	140	103.115942
0	0.428977273	0	5.189958408	0	1.158245614	0	4.219135802	140	128.0402461
0	0.728090406	0	1.215191053	0	1.191710758	0	1.909288654	140	133.1294326
0	0.868622991	0	9.757809695	0	1.25291937	0	3.707545455	140	114.6706891
0	7.928562519	94	74.57654374	89	31.35633302	0	31.99219298	0	0.833333333
0	10.85612335	94	70.81294244	89	51.3444496	0	19.7550015	0	0.755555556
0	7.736765561	94	85.49070837	89	57.62436012	0	31.56134752	0	0
0	3.797376543	94	88.26565465	89	40.76603318	0	39.76124698	0	0.857275255
0	6.080736123	94	88.51253754	89	53.18572282	0	28.4161589	0	0
0	5.221606648	94	79.12671958	89	50.41987296	0	34.74283808	0	0
0	12.96258752	94	68.803204	89	37.50549484	0	35.1647793	0	17.89239332
0	13.87295597	94	68.72338734	89	68.51774145	0	27.34925194	0	0
0	20.70076805	94	38.10518854	89	61.38999698	0	44.61365107	0	0
0	7.343958713	94	81.46087609	89	50.49481412	0	36.78850575	0	0
0	18.60691824	94	61.71064477	89	51.61446307	0	34.94760572	0	0
0	15.74072425	94	37.03033988	89	49.72763158	0	43.40489753	0	0
102	68.07599362	100	82.24510676	0	11.53874034	0	7.313684211	84	91.26800357
102	77.45296533	100	97.29627469	0	4.878499278	0	1.641996403	84	87.29103153
102	80.40506366	100	90.93607517	0	9.82132375	0	3.11722028	84	90.43073834
102	83.12084481	100	100.2741821	0	1.431806167	0	1.482442068	84	104.6330965
102	59.95940325	100	102.7116761	0	0.287122612	0	0.390097259	84	114.3149131
102	75.58264499	100	100.9019465	0	1.55221833	0	3.089112443	84	93.27737337
102	42.12711151	100	99.52007909	0	1.611628615	0	0.671523983	84	116.8751535
102	77.70544872	100	100.6008873	0	1.542565056	0	0.220564149	84	89.02631497
102	88.20267396	100	99.17503109	0	0.673913043	0	0.922181485	84	84.44131563
102	74.02655924	100	98.36845075	0	3.156781193	0	1.656429232	84	91.15555556
102	87.91445232	100	90.59614084	0	9.062004337	0	2.435559461	84	87.01659112
102	77.04951603	100	102.1452547	0	0.278030303	0	0.85497558	84	113.4672817
49	42.66966912	53	49.95333025	55	52.23527305	58	51.27932529	75	77.36539405
49	48.13895213	53	52.59812701	55	54.50019415	58	57.28531123	75	75.41010979
49	45.57033208	53	46.31267057	55	51.99218937	58	55.36922383	75	76.93460829
49	41.21447368	53	51.64561794	55	51.4370405	58	53.26844324	75	79.54122888
49	43.15147837	53	46.30373438	55	42.43375399	58	50.68959623	75	80.88602385
49	42.75042271	53	60.04791099	55	52.41103995	58	55.70346839	75	76.73027728
49	41.24838365	53	50.83352025	55	48.61627129	58	45.3095586	75	78.88303175
49	47.40464873	53	54.26721763	55	52.54593387	58	58.47546642	75	74.16193609
49	45.84614114	53	50.35181363	55	45.57098546	58	54.32173371	75	78.19907324
49	46.19572051	53	50.06430481	55	52.12511862	58	56.85685185	75	76.14171131
49	47.93405797	53	55.16539725	55	51.49646918	58	57.23764526	75	74.50669014
49	46.12794848	53	53.38611374	55	52.45558575	58	56.81417347	75	77.64473603
0	8.615555556	0	2.329738267	0	18.94021868	110	101.8807508	110	110.0136245
0	4.874133701	0	1.388283379	0	7.694202226	110	100.8672529	110	95.67423423
0	4.049730942	0	2.238680616	0	6.001793722	110	95.60573372	110	109.0951998
0	3.343154762	0	1.60793934	0	11.38409091	110	103.1640523	110	107.2689297
0	1.885068821	0	4.25475763	0	10.66125343	110	95.55707118	110	100.4103771
0	1.751678877	0	0.967825557	0	16.38151314	110	101.8913213	110	106.1344895
0	3.148278906	0	0.863784908	0	21.23612874	110	91.5603941	110	109.1199099
0	0	0	0	0	18.67964275	110	98.72168491	110	109.8508303
0	7.004903786	0	1.717618616	0	17.40704247	110	92.66323306	110	109.1667925
0	8.617392677	0	1.436603088	0	13.98613196	110	101.4424161	110	108.707581
0	0.398450947	0	15.42013321	0	21.59944802	110	87.2385006	110	107.4099107
0	0.574565416	0	6.926078972	0	18.17429481	110	88.90618375	110	108.572619
0	3.373015873	0	1.295756458	120	92.64372677	0	8.242797619	110	107.6861385
0	1.177727273	0	1.174060929	120	102.7435152	0	4.52835249	110	105.3540105
0	1.705540293	0	0.093023256	120	106.2344556	0	7.834465296	110	110.1264205
0	13.00210461	0	2.19189268	120	106.1530546	0	6.198660714	110	109.4531634
0	3.480309936	0	2.539485248	120	104.1888687	0	4.428662918	110	110.6699676
0	0.275675676	0	18.44209606	120	62.48645833	0	6.576144928	110	108.8827111
0	2.002965709	0	2.208333333	120	103.6825744	0	7.187549108	110	110.5545157
0	3.150140318	0	5.680717419	120	105.8513778	0	10.10015138	110	110.8986514
0	3.713990268	0	2.610943223	120	106.0566757	0	9.072470238	110	107.0919379
0	0.356306306	0	4.052767584	120	105.3074618	0	8.693181112	110	108.868871
0	1.567518248	0	2.234615385	120	85.18360656	0	16.07623924	110	110.2143498
0	0.551629073	0	3.678982365	120	37.86391088	0	21.88547991	110	95.19905521
100	80.59598253	100	97.37288058	110	100.0276225	0	0.781002639	110	101.5276284
100	73.84554531	100	93.58487227	110	105.266908	0	0.110796349	110	108.1557811
100	91.89960618	100	94.449985	110	100.4612854	0	0.09219191	110	108.714539
100	95.47407746	100	87.30975897	110	103.7632727	0	0.174340086	110	105.8804805
100	89.81075813	100	97.86166815	110	99.26074288	0	0.94390681	110	107.402329
100	75.90818154	100	84.12394324	110	103.8735893	0	0.154419411	110	105.4862496
100	98.51644504	100	97.42465956	110	108.6709662	0	0.241316271	110	109.3205128
100	94.38766999	100	98.92556918	110	109.5077413	0	0.336651584	110	109.3114729
100	89.98285316	100	98.28510703	110	108.2949907	0	0.157990868	110	109.1574074
100	94.9163307	100	77.8756343	110	105.1314597	0	1.269612263	110	105.7668189
100	96.06262673	100	93.24061372	110	108.3059025	0	0.730258303	110	108.9966422
100	93.77097902	100	88.62792464	110	102.8187992	0	1.469710272	110	105.9528056
0	8.934867257	110	100.5800549	0	0	0	0	0	0
0	4.012170754	110	102.0977401	0	0	0	0	0	0
0	6.49913259	110	104.0892	0	0	0	0	0	0
0	5.24799253	110	107.7536765	0	0	0	0	0	0
0	17.87192661	110	109.386835	0	0	0	0	0	0
0	18.27070662	110	107.065846	0	0	0	0	0	0
0	6.943555974	110	105.5141536	0	0	0	0	0	0
0	10.55133457	110	103.6999059	0	0	0	0	0	0
0	7.112027803	110	108.3825441	0	0	0	0	0	0
0	26.46665183	110	105.9582198	0	0	0	0	0	0
0	10.28870104	110	99.36903915	0	0	0	0	0	0
0	17.93662222	110	108.4397458	0	0	0	0	0	0
90	80.44303327	0	4.743726592	0	32.60333025	0	9.279455966	0	0.633194573
90	89.47367629	0	3.717364341	0	15.35391061	0	2.773535725	0	0.095769577
90	89.50102729	0	1.637307236	0	7.417604167	0	4.245342707	0	0.13015582
90	89.5244907	0	1.235031664	0	11.17221184	0	1.379681648	0	0
90	89.22964174	0	3.441204965	0	14.78179626	0	1.425723995	0	0.530161527
90	89.80624049	0	2.370814132	0	3.602671637	0	0.665367582	0	0.236708861
90	88.36619674	0	3.394858463	0	6.406074766	0	6.686926058	0	0.206434783
90	89.27546296	0	2.112332112	0	4.341720233	0	3.963375604	0	0.207920792
90	87.73005488	0	1.305305755	0	1.903003003	0	1.042742927	0	0.369153776
90	87.84296537	0	3.323609845	0	2.820188221	0	2.387567913	0	0.26443203
90	89.35969479	0	3.905591201	0	5.045571956	0	2.001565793	0	0.182129964
90	90.64048496	0	17.84793165	0	18.65745773	0	1.343896714	0	0.673363229
0	26.68233515	96	95.96387097	99	99.05788288	98	98.03854545	110	105.5709058
0	2.684052648	96	95.88910891	99	98.57647334	98	98.09664839	110	109.7495396
0	0.970862989	96	95.93491773	99	99.00786273	98	98.00215054	110	109.9938053
0	0.848526703	96	95.98248175	99	99	98	98.00225352	110	109.9561479
0	0.285811423	96	95.95500477	99	98.47052583	98	98.11562116	110	110.0243674
0	2.5943855	96	95.99043238	99	99.05625	98	98.01859617	110	109.5256299
0	0.584879406	96	95.986817	99	99.00204918	98	98.00354925	110	109.9805014
0	1.90440367	96	95.98600368	99	99.01515858	98	98.00218978	110	109.7929793
0	20.58545811	96	96.01938959	99	99.10166068	98	98.04120782	110	106.7587131
0	1.088420108	96	96.00820896	99	99	98	98.00717336	110	109.9511979
0	2.532952816	96	96.09130817	99	98.41663725	98	98.08095238	110	109.7066667
0	13.01185085	96	96.7475292	99	93.69429224	98	98.53406998	110	108.3839962
90	68.01409077	93	26.38517686	0	59.95894272	93	95.19429284	0	1.784313725
90	82.75697711	93	75.35169082	0	14.21532618	93	93.5826684	0	0
90	83.71361265	93	80.16375493	0	11.96476977	93	93.29083035	0	0.263205013
90	86.29593459	93	61.32640415	0	20.76209653	93	93.5481982	0	0
90	80.69677177	93	82.33717135	0	14.35983213	93	93.27861237	0	0.510757032
90	84.89127976	93	84.3925277	0	6.432017544	93	93.09165921	0	0
90	81.09664179	93	78.64134727	0	9.479958555	93	93.18959468	0	0.258995434
90	86.32742711	93	77.90347711	0	8.674706055	93	93.05024198	0	0.05141844
90	84.46027674	93	82.13385754	0	9.083554502	93	93.20724896	0	0
90	83.13804855	93	72.85772137	0	23.8290367	93	93.01441681	0	0.176386404
90	86.25965071	93	81.58123457	0	12.18691943	93	92.39305037	0	0.133395522
90	88.02110606	93	41.79276673	0	51.75813369	93	90.25849374	0	0
43	25.60796842	44	48.96595905	47	66.37851917	49	90.27483602	54	52.90317837
43	32.0377902	44	43.77746606	47	61.22343063	49	63.39344067	54	55.03153358
43	40.59180303	44	45.12656584	47	55.89091456	49	54.80863758	54	37.02027223
43	43.88065937	44	44.64371482	47	48.9147482	49	52.58222123	54	53.67548234
43	42.09793199	44	45.69012901	47	49.18580978	49	54.17443939	54	50.045053
43	45.17236998	44	44.82456613	47	49.02619491	49	52.05317531	54	53.10273401
43	43.73276569	44	44.28918182	47	58.88984058	49	63.33458254	54	50.77532407
43	42.70204263	44	44.63717365	47	47.81704036	49	51.00397321	54	52.72084066
43	42.4339823	44	42.99218009	47	48.23080533	49	52.9755165	54	55.65354274
43	41.90828025	44	43.71343982	47	49.80190611	49	52.71956779	54	52.01834101
43	40.32429329	44	40.58081181	47	54.14670875	49	61.24295332	54	51.43428875
43	32.98339243	44	33.65863566	47	81.48723843	49	87.15098298	54	41.06714024
0	32.76665061	0	14.25221615	100	87.33085793	98	89.62397529	0	11.01244687
0	24.84130502	0	10.64430418	100	92.81717498	98	93.02137072	0	2.429257908
0	21.77858439	0	4.525979073	100	98.58895314	98	96.27454744	0	1.128808446
0	19.5912037	0	4.700958029	100	96.4991107	98	95.93850626	0	3.108052919
0	21.00629664	0	4.412222222	100	91.3106248	98	88.09664311	0	1.010762332
0	22.22469136	0	2.656315632	100	98.51743929	98	96.94517422	0	0.301459637
0	50.16080961	0	2.94872035	100	97.52679916	98	98.36804936	0	0.234489051
0	41.93915463	0	6.94126769	100	94.53538122	98	97.50669192	0	0.155251142
0	60.02070707	0	1.35748393	100	98.17332095	98	98.53346388	0	4.903459953
0	50.74383741	0	3.570787713	100	97.70161713	98	98.32543935	0	0.050704225
0	68.16585253	0	3.71328594	100	97.00587798	98	97.93241077	0	0.16622458
0	73.21255293	0	13.8024014	100	88.75766017	98	97.9856947	0	0.234299517
94	31.64065224	0	14.53694521	100	90.01573309	99	93.0408767	0	3.389624924
94	42.37135076	0	6.748090122	100	98.52877847	99	97.53918919	0	0.186025408
94	38.40114564	0	2.576951673	100	97.90392772	99	97.98145187	0	6.807554945
94	34.62301875	0	5.308380062	100	95.38791737	99	96.7732544	0	0.283695652
94	35.7241659	0	2.138994279	100	97.64090627	99	97.31086957	0	6.769519116
94	47.76782074	0	3.717790262	100	97.52340489	99	98.23524765	0	0.205405405
94	40.63640231	0	7.646345811	100	94.5692785	99	98.24560645	0	12.4752093
94	64.2603845	0	17.94505069	100	86.10472834	99	97.50285108	0	1.289275362
94	73.21685926	0	9.898974594	100	89.51303824	99	97.28563167	0	0.687431942
94	85.02362814	0	34.6629023	100	65.21473228	99	94.08800366	0	0.227857143
94	88.38646865	0	40.93656103	100	53.99287184	99	95.40701835	0	6.840182246
94	86.96964945	0	42.77060915	100	45.80343137	99	94.58764881	0	6.516992248
99	94.94691524	100	92.34953216	0	16.61334835	0	3.031501502	0	13.99341865
99	96.96268905	100	94.8029877	0	13.01663701	0	2.446406071	0	8.651064149
99	93.46814578	100	84.91297314	0	13.01280148	0	4.01978691	0	3.473149031
99	99.20735027	100	94.2409589	0	11.22627793	0	0.571226415	0	0.063768116
99	96.14191404	100	93.87170543	0	6.89845706	0	1.616865261	0	1.207977208
99	98.97359113	100	95.320748	0	4.74840824	0	0.987818236	0	0.957241795
99	98.82451532	100	95.60102286	0	4.640148011	0	0.2881691	0	1.067905712
99	98.96068955	100	88.94949863	0	4.503649187	0	0.596515572	0	0.847739852
99	98.92905346	100	98.35929952	0	13.05231967	0	0.634355346	0	1.204205462
99	98.75219219	100	92.73453968	0	7.127688172	0	2.448858447	0	1.091288566
99	67.85880048	100	60.67025618	0	42.56202938	0	3.55298278	0	20.04030797
99	77.83480138	100	65.6292006	0	31.4633547	0	1.155699722	0	8.681478046
97	82.82639269	100	76.84872945	110	92.16551826	0	5.75602132	0	27.18473842
97	87.0083709	100	88.19346347	110	89.18928791	0	0.531754706	0	2.396316102
97	95.77561501	100	92.04880526	110	105.3459382	0	1.346368715	0	6.386198885
97	96.76327078	100	93.60886303	110	104.3456284	0	3.186672711	0	8.812618829
97	88.0074175	100	92.87092491	110	106.7201175	0	0.954025618	0	1.554244306
97	81.89485119	100	93.3370303	110	102.7281183	0	3.396538919	0	1.472418058
97	93.22138508	100	87.0755278	110	76.52310323	0	8.02020202	0	0.657772861
97	91.34633838	100	83.29790179	110	102.2497253	0	1.456535047	0	3.164941494
97	95.61983103	100	92.08280591	110	102.4269372	0	0.997282609	0	1.158400719
97	85.18031634	100	95.60388687	110	105.5215528	0	1.520321101	0	3.35048119
97	95.74971186	100	90.34883227	110	88.0813709	0	1.118819081	0	3.738516533
97	92.83073633	100	75.85132885	110	42.88707361	0	3.586449864	0	15.14264483
100	62.72550075	0	11.1377296	110	102.8519753	110	104.4998375	130	127.5018416
100	87.36619654	0	9.381145084	110	107.5383586	110	100.8585638	130	112.8046177
100	86.22882562	0	6.422433002	110	108.6680315	110	104.6944191	130	118.1589302
100	90.26848958	0	4.091887125	110	108.5606762	110	104.6756011	130	128.176687
100	82.60295077	0	4.195903166	110	107.1109515	110	107.8057033	130	128.2733483
100	72.59929144	0	4.46617284	110	108.2342982	110	108.0268873	130	127.9925829
100	92.97751174	0	2.508654434	110	108.8372243	110	108.214587	130	127.6835512
100	84.73405172	0	30.64729332	110	90.38017978	110	91.10655183	130	88.43176664
100	92.52030464	0	4.168016014	110	106.5693953	110	103.6374174	130	117.0020569
100	75.80921169	0	11.51679941	110	105.183671	110	106.673413	130	115.4576485
100	96.25608671	0	4.225766017	110	106.1734787	110	102.1690912	130	120.4167292
100	95.38913874	0	22.10628589	110	95.80770426	110	91.73854261	130	103.7347584
97	91.47901961	100	95.7501909	0	31.48577677	100	70.39021435	79	78.54649043
97	94.21086142	100	96.75658302	0	12.37077584	100	93.0331283	79	81.67216066
97	91.16116058	100	96.1464135	0	7.69307554	100	90.73376029	79	71.5561762
97	93.0476947	100	95.80172625	0	5.455725879	100	89.72927294	79	77.17145871
97	95.67856925	100	95.9503918	0	9.230265849	100	91.17876777	79	79.3165496
97	94.83497738	100	97.66565244	0	2.905201886	100	94.78243115	79	78.70295603
97	94.04624038	100	98.64018913	0	2.331811263	100	93.04378707	79	76.86880734
97	92.86737262	100	93.01800357	0	1.99075592	100	92.13088454	79	76.41776028
97	96.21032028	100	93.23597056	0	14.89391682	100	94.0071472	79	81.21877256
97	94.61449826	100	96.77269207	0	36.82127691	100	82.29144393	79	79.87525946
97	89.71666667	100	97.83451481	0	38.06499077	100	93.72299754	79	79.65927065
97	65.53654529	100	95.96209799	0	32.71463378	100	80.36544273	79	77.28093702
96	86.66212798	0	13.57436129	0	9.595032334	0	13.32298903	89	76.3927036
96	88.31076994	0	29.55773975	0	10.16398644	0	11.77040998	89	66.67884329
96	90.7406355	0	10.33613357	0	7.717578917	0	2.836917892	89	80.64043321
96	74.700619	0	23.97100789	0	6.887683109	0	13.32320656	89	72.80370033
96	82.11258595	0	10.98466425	0	4.335323383	0	2.322308355	89	81.98165761
96	88.16550128	0	6.145345745	0	2.570294574	0	1.183860574	89	85.85490566
96	86.14057254	0	6.587585991	0	4.365152838	0	1.105118602	89	75.54397132
96	62.67975758	0	14.44065702	0	5.377444934	0	9.044718857	89	76.50099938
96	80.30215504	0	20.79864948	0	3.948613678	0	9.393833333	89	57.43731145
96	93.34526188	0	5.57891712	0	6.751253241	0	1.16162963	89	84.90476408
96	94.0760006	0	10.99086673	0	3.918632002	0	2.262751275	89	79.87701255
96	83.87463699	0	22.45108923	0	12.44889894	0	0.977580071	89	78.93228693
110	102.4551757	0	25.25806263	110	97.61561452	0	0.350457038	0	18.61581664
110	103.2016862	0	32.5428317	110	98.64281508	0	6.360878788	0	7.071910279
110	107.446875	0	9.148873072	110	104.1913824	0	0	0	15.69363156
110	108.2512329	0	8.74429669	110	103.8359745	0	0.011596789	0	8.284925788
110	106.3251542	0	12.21631531	110	100.257844	0	0.106035283	0	7.190545295
110	109.0531158	0	3.653757737	110	94.19861111	0	0	0	2.360038382
110	105.089958	0	2.745224892	110	96.33257645	0	0	0	0.70727101
110	107.6131893	0	2.683722322	110	105.7335386	0	0.108675799	0	0.301939058
110	105.9555505	0	2.209724663	110	104.8210797	0	0.067324955	0	0.459498208
110	98.70250737	0	7.61312361	110	94.34022624	0	0.089090909	0	2.073302892
110	98.44918256	0	2.887221269	110	96.48438894	0	0.19078341	0	1.736135182
110	99.28407871	0	4.203892493	110	95.77638889	0	0	0	5.880038079
0	54.05506521	0	10.32041512	120	76.27807339	0	38.28710664	0	8.460037003
0	20.03217807	0	2.531413141	120	99.79641163	0	10.43455008	0	1.029713424
0	31.84010703	0	2.546623696	120	104.1686984	0	17.92450611	0	0.077407741
0	21.94734955	0	0.898262243	120	106.7380575	0	8.823499246	0	0.080258303
0	8.572819537	0	3.450272727	120	111.4800617	0	5.591046582	0	0.018450827
0	12.84288338	0	5.183731984	120	106.7426525	0	17.41073345	0	22.45310559
0	21.13617373	0	4.217224178	120	99.08012048	0	4.41728972	0	1.424684685
0	12.59023144	0	7.475240595	120	113.8583878	0	2.995672933	0	0.173609787
0	32.4154688	0	1.986791333	120	101.1400709	0	9.990300906	0	0
0	22.013316	0	5.909939668	120	95.19363437	0	11.43000306	0	0.962729536
0	12.75658779	0	3.1678097	120	104.5248034	0	13.16949911	0	0.098566308
0	58.79421738	0	0.62100318	120	75.72071537	0	15.4044697	0	0
0	4.759085328	100	77.44300151	110	87.751739	110	105.5064335	0	40.13792593
0	11.5792855	100	83.94044049	110	104.0117734	110	100.6932082	0	6.954466859
0	17.50846847	100	85.10929573	110	97.59137148	110	100.9505223	0	10.63660956
0	8.9885918	100	87.78654562	110	101.7886239	110	104.6152098	0	8.692509699
0	9.094670451	100	91.50299106	110	102.2655255	110	104.3759209	0	4.851488953
0	10.80138765	100	89.63731884	110	103.0900472	110	102.7945723	0	4.596243043
0	4.002081448	100	91.76877581	110	101.6126942	110	107.8429511	0	28.77410768
0	11.6179321	100	95.58358071	110	101.3075758	110	108.4053086	0	14.56342892
0	23.47414997	100	89.93560809	110	102.9207404	110	108.0098066	0	9.276126126
0	26.57615127	100	83.6566487	110	92.12167586	110	98.25946237	0	17.58331808
0	24.2088377	100	83.508927	110	100.8086774	110	106.4432268	0	17.8715713
0	42.29032656	100	60.00923929	110	74.92589445	110	77.59881797	0	46.45778287
47	56.26101774	53	56.88780822	54	69.39504463	54	63.61285759	58	51.27120807
47	47.85111918	53	53.45157957	54	64.79559242	54	55.99725471	58	51.93121297
47	42.4914587	53	51.98381395	54	65.17805966	54	55.8259976	58	52.5581855
47	48.85321115	53	57.26920035	54	59.93352888	54	57.17263079	58	55.70595238
47	47.67724331	53	59.11478351	54	58.25798736	54	64.11126655	58	57.55796178
47	49.99212437	53	60.13575435	54	68.49075075	54	69.36852993	58	57.20452002
47	51.04922202	53	46.79941704	54	60.62150031	54	57.43886371	58	55.96403121
47	47.16086631	53	49.48899254	54	67.01178935	54	55.42253771	58	57.81940058
47	48.84253685	53	53.80112771	54	56.56340316	54	61.88834906	58	57.25462709
47	45.88383562	53	51.06253837	54	62.21117886	54	55.5671573	58	59.25461515
47	44.62066542	53	51.56973645	54	67.37377098	54	51.09507979	58	59.72876858
47	44.51544572	53	46.92218674	54	64.49681373	54	58.25926821	58	66.48291317
0	4.221861472	100	94.79441341	0	10.14197255	100	100.6535918	99	99.30811223
0	1.825046041	100	93.99358387	0	8.912469586	100	101.1579186	99	99.81646127
0	0.665487769	100	86.10486233	0	29.85647731	100	101.0146305	99	103.2219655
0	0.332279778	100	93.14002368	0	8.481833333	100	100.7269149	99	99.72412587
0	1.1761735	100	96.07386888	0	6.200510856	100	100.2673447	99	99.67313113
0	1.830486726	100	95.61182206	0	5.998632316	100	100.5350439	99	98.19044425
0	0.283318291	100	92.582263	0	6.850973236	100	100.8070776	99	99.24222319
0	0.154405286	100	84.91910641	0	18.35173077	100	101.5718924	99	100.7031146
0	0.442075996	100	81.63321321	0	28.27143283	100	103.5505742	99	104.4096171
0	2.771102028	100	57.7626272	0	37.01316726	100	105.1408951	99	104.3893178
0	1.645266005	100	64.51813073	0	38.51175214	100	104.5363153	99	102.7048624
0	31.03445826	100	26.45481617	0	101.204056	100	105.6175934	99	105.8337862
94	78.92124094	0	7.219976872	0	33.8878854	100	85.2269371	0	0.079503676
94	78.16699581	0	3.117682742	0	13.25935542	100	94.01981331	0	0.236211573
94	73.38587798	0	2.445982533	0	23.6522433	100	83.03978938	0	0
94	83.91325959	0	1.848123123	0	19.6952648	100	88.49673681	0	0
94	65.41330383	0	2.230357143	0	11.68175096	100	87.00707391	0	0.047279215
94	90.01677341	0	9.989834087	0	4.978478664	100	96.59968525	0	0.369459963
94	81.11328849	0	1.042390973	0	11.02588305	100	86.47684082	0	0
94	81.13109498	0	1.359485816	0	2.486025521	100	81.02448276	0	0.283708371
94	60.53368119	0	2.136464088	0	28.71738747	100	78.74725086	0	0
94	84.10253823	0	3.368417047	0	3.083615819	100	93.47024648	0	0.136387665
94	60.54104205	0	14.13896499	0	5.391119221	100	94.08367096	0	0.063585952
94	60.24639349	0	8.748367221	0	1.584594835	100	76.26928636	0	0.122881356
0	3.222172352	0	79.11763668	110	88.20924908	110	100.7817723	130	117.2290551
0	2.016651249	0	4.671650542	110	103.6803016	110	108.9206855	130	128.3584665
0	0.019282511	0	8.857649254	110	107.5038006	110	108.5512461	130	128.7739884
0	4.093381686	0	39.57144586	110	94.1089169	110	106.2091592	130	125.3186355
0	0.704389816	0	26.26001188	110	104.9301347	110	107.7033571	130	127.5163194
0	2.77469419	0	5.131953195	110	107.0254626	110	109.2554645	130	129.455303
0	0.056728232	0	1.076908577	110	107.3827093	110	108.3560395	130	128.426776
0	1.747339946	0	6.035335917	110	100.0156898	110	108.4106764	130	128.2313567
0	0.364619615	0	13.02412869	110	84.32562189	110	109.1369843	130	127.648892
0	0.091074681	0	9.36305003	110	96.33437314	110	108.7565033	130	128.0442069
0	13.07224305	0	28.86710984	110	85.27529412	110	107.1083409	130	109.4727068
0	0.584462511	0	20.50882168	110	80.76306922	110	106.1481656	130	123.6638012
0	8.696663688	0	4.785397693	0	2.997912886	0	1.187557756	0	2.081551826
0	7.82578534	0	3.786031452	0	2.265526802	0	1.363818288	0	0.948336278
0	10.8016835	0	4.92739565	0	2.781992687	0	0.186330609	0	0.728120346
0	14.42082162	0	2.760555063	0	9.430933567	0	1.703943581	0	2.869180716
0	11.21123389	0	7.566243961	0	7.889001536	0	2.35952598	0	2.347261127
0	3.029466283	0	4.771477027	0	8.918665437	0	0.136413043	0	4.372585097
0	20.39730942	0	2.442232278	0	9.078319783	0	0.166816952	0	1.100499266
0	2.762008282	0	1.604426378	0	2.483301708	0	1.046334842	0	2.754135338
0	29.83208999	0	0.946149324	0	6.246518519	0	0.404140414	0	1.141060198
0	7.069204893	0	2.85974336	0	1.77414966	0	0.267665198	0	1.406540654
0	1.420670148	0	3.732093023	0	2.408740741	0	0.955960061	0	4.030289466
0	1.913671875	0	5.61090964	0	3.307096005	0	0.08365019	0	2.162449098
97	62.81997526	100	76.39911426	110	53.3829376	110	79.31527517	0	28.79154501
97	79.24869578	100	90.22636391	110	84.36008577	110	85.30713252	0	6.584549638
97	93.54598268	100	89.91201762	110	97.67360483	110	106.0447066	0	7.726858974
97	86.90596398	100	91.04936766	110	102.7839318	110	106.5357417	0	6.931066066
97	91.55746678	100	94.24964222	110	86.61707062	110	106.771556	0	0.736621212
97	94.36110116	100	98.49124549	110	100.2236223	110	101.0704137	0	4.171560606
97	94.53078397	100	94.14609185	110	96.86504673	110	106.3152351	0	19.31953564
97	92.43780561	100	89.97001779	110	94.29027651	110	105.9516365	0	11.01507206
97	85.45479452	100	87.18638138	110	100.5630866	110	103.3057958	0	7.032195198
97	89.63810586	100	87.65885175	110	85.90814548	110	102.9935093	0	27.5062012
97	93.38461999	100	94.88601409	110	91.56752175	110	105.0491561	0	23.97234921
97	91.52272048	100	91.00625971	110	38.39461679	110	104.0565586	0	3.951577564
97	59.26458522	0	23.4650437	0	13.86001152	100	84.87684195	86	85.6376324
97	81.1286209	0	10.65777574	0	5.457721281	100	99.33859155	86	83.78697917
97	83.41124278	0	17.2674581	0	6.414802834	100	95.31052306	86	85.44109779
97	71.58718883	0	24.92421525	0	29.44235097	100	91.31214869	86	84.52889088
97	79.98538065	0	19.10444055	0	15.99278761	100	93.64515015	86	84.30621981
97	76.71440234	0	8.334631643	0	15.94806343	100	96.23251664	86	84.04065407
97	42.97389042	0	14.98320059	0	20.48204436	100	56.05262843	86	84.98957235
97	67.99373309	0	3.333081033	0	4.194129979	100	90.00192713	86	83.92035358
97	71.07407082	0	16.36309192	0	23.43985111	100	88.55471588	86	84.22899816
97	70.51798361	0	7.643387193	0	8.271987687	100	80.74195455	86	85.61560799
97	69.69420161	0	32.57751417	0	15.15496124	100	59.1883536	86	84.23014683
97	73.86768167	0	45.66672749	0	23.08586479	100	69.56874811	86	83.82094939
0	30.97340789	110	81.16384051	0	6.838796296	0	47.57721272	87	51.51131062
0	7.859238797	110	89.62149503	0	4.258117284	0	41.16593567	87	67.30291386
0	5.384691943	110	98.92916667	0	3.75509434	0	15.81623489	87	66.03173643
0	6.858423261	110	97.33688525	0	3.557190433	0	8.158959096	87	78.75493601
0	6.001114005	110	102.7511693	0	3.337376543	0	5.656399097	87	83.97622345
0	2.429854809	110	104.8925692	0	3.729122125	0	14.27826156	87	81.35774985
0	8.741314765	110	100.0955992	0	4.341109155	0	11.22392352	87	83.64723748
0	8.817727552	110	103.7552314	0	1.95547619	0	13.21573309	87	83.86881428
0	7.131844424	110	95.239328	0	2.75184513	0	30.05157174	87	73.94039904
0	9.768443847	110	93.39323418	0	2.739665145	0	16.67044704	87	84.35356365
0	9.145136418	110	98.80141376	0	8.088053234	0	24.41975655	87	76.31194097
0	18.15879121	110	83.6643689	0	11.57764706	0	28.63653618	87	77.04570776
0	43.22481741	100	82.18968877	100	96.02049491	0	3.63548437	86	86.40488106
0	9.688405172	100	74.29649283	100	87.49984917	0	9.454989086	86	83.23713398
0	12.34421861	100	78.83312444	100	97.89436531	0	5.375053763	86	84.82992284
0	26.57314647	100	75.55898108	100	93.57785326	0	15.47556604	86	84.37611826
0	28.84017968	100	77.89371429	100	98.77692901	0	22.5828163	86	85.65154934
0	19.42446261	100	87.11304032	100	86.9669775	0	7.098691099	86	84.69595367
0	11.22352407	100	62.64165149	100	89.76200414	0	3.242247332	86	85.8629836
0	8.869833192	100	75.41359316	100	88.9234375	0	4.86369156	86	84.25250545
0	10.39456555	100	80.95155221	100	91.61985272	0	3.941556535	86	85.87916667
0	8.298475242	100	85.1686318	100	98.77732265	0	7.05886392	86	85.99423077
0	32.62360612	100	71.81832453	100	97.93216427	0	9.855021766	86	86.08676649
0	36.79150714	100	52.62908705	100	94.07831592	0	27.33938492	86	85.62382255
0	17.35320733	0	12.53034462	0	8.73505291	100	84.48515837	0	0.765370705
0	6.498251217	0	14.44273161	0	22.81435705	100	84.60822898	0	0.113928013
0	5.679202011	0	13.1027626	0	3.564003591	100	95.21044158	0	0.106581353
0	3.728609389	0	28.55417782	0	10.53677856	100	96.46295306	0	0.358932854
0	2.297578475	0	20.53382992	0	2.096333333	100	98.07504529	0	0.028008658
0	4.562075134	0	28.0551259	0	19.64576321	100	71.81839595	0	0.217491166
0	2.757481146	0	34.75269697	0	7.01529745	100	92.75153823	0	0.243014706
0	7.198649478	0	26.77404824	0	8.6675243	100	60.83328853	0	1.260389036
0	14.08149793	0	16.71511071	0	5.655354306	100	84.35752736	0	0.224977211
0	2.938253103	0	57.45124242	0	15.71191974	100	89.46985404	0	0.058902878
0	3.198944549	0	46.51180683	0	8.68996997	100	86.20111416	0	0.242007435
0	0.913762038	0	60.34064891	0	6.504355717	100	74.30383562	0	0.809335675
97	91.34316081	100	99.80900901	100	99.52075812	100	99.93375874	80	81.13818798
97	92.72025279	100	99.99273388	100	99.80432822	100	100.005512	80	80.93855881
97	95.64785354	100	99.7483871	100	99.90207156	100	100.0226357	80	80.30012034
97	96.80424403	100	89.24245089	100	100.2338833	100	102.1606481	80	85.03255566
97	96.17013826	100	99.99639315	100	99.82816652	100	100.003095	80	80.13363636
97	85.03019994	100	99.95659876	100	99.80693069	100	100.0048309	80	81.83454325
97	89.36004707	100	99.97484277	100	99.96224678	100	99.99448022	80	81.01515152
97	96.61674376	100	99.98542805	100	99.88468551	100	99.99940316	80	80.06669711
97	93.2859172	100	99.35188564	100	100.1276498	100	100.1017378	80	80.61392405
97	90.20827402	100	99.56367041	100	99.8275069	100	100.075603	80	80.85889669
97	82.34260922	100	99.24907407	100	99.98741845	100	100.1611061	80	82.30894234
97	43.80267508	100	90.52675522	100	99.49795404	100	101.8269175	80	90.57731566
0	1.781126332	100	78.97954408	0	4.355297398	99	84.14630739	0	5.789173171
0	0.791252302	100	83.32062461	0	19.75975573	99	83.74721478	0	0.382513154
0	4.420275713	100	71.36727829	0	8.0183065	99	91.0204793	0	0.814226519
0	1.604241071	100	92.74438534	0	1.895784402	99	91.20655535	0	0.584580399
0	3.127232143	100	91.93571205	0	1.849513382	99	92.30699856	0	0.597150259
0	1.855227339	100	82.03419458	0	2.167343798	99	78.63284538	0	1.782600733
0	2.739082514	100	78.21097674	0	1.036684948	99	93.7782344	0	1.812163796
0	4.627142435	100	95.77277778	0	8.395652174	99	80.10028919	0	1.487701975
0	4.425060938	100	87.04109832	0	5.179148311	99	90.066681	0	0.970219298
0	4.989392579	100	90.4187389	0	14.96819958	99	57.3239722	0	17.55195988
0	5.282404912	100	83.66132104	0	38.14244505	99	27.51599221	0	10.11042591
0	51.15813708	100	54.08734676	0	37.26679081	99	16.20841569	0	14.8764313
98	62.45362319	0	25.7564695	110	98.68271392	0	44.07895776	82	88.99114729
98	93.28459384	0	4.612431942	110	106.248086	0	6.774760244	82	82.8259887
98	94.57249852	0	4.375323475	110	106.2808575	0	4.341902238	82	81.82324718
98	97.33169789	0	1.351556777	110	109.6281004	0	8.082255166	82	82.79637489
98	97.15870041	0	1.026303456	110	109.5015404	0	4.412307692	82	80.41760219
98	93.63760572	0	5.722407923	110	103.868993	0	8.512939002	82	82.76168091
98	97.29162805	0	3.415401037	110	108.1296101	0	13.99552624	82	81.57372727
98	93.28520193	0	7.531750299	110	102.8253546	0	19.49932002	82	78.25456664
98	93.92435781	0	5.79911032	110	108.2699667	0	16.35987383	82	81.98145009
98	97.43963324	0	1.077182355	110	108.5592525	0	3.867753623	82	81.96808511
98	94.2428508	0	8.366562314	110	107.3396724	0	7.026388889	82	81.09457922
98	89.68390237	0	22.30784927	110	104.8868389	0	23.70640177	82	81.99980392
0	11.96835556	0	11.36793722	0	14.55982117	0	4.164441458	84	84.2818789
0	11.92632399	0	3.136657641	0	7.632800609	0	6.565694318	84	83.87482496
0	8.051022589	0	12.5834231	0	2.907535703	0	5.277510783	84	84.2514862
0	9.664170472	0	6.780315438	0	10.39357054	0	8.785035265	84	80.7410554
0	20.39968861	0	28.06969561	0	20.03113799	0	42.44520985	84	81.29249035
0	7.172841727	0	5.273773821	0	8.522774327	0	5.813574521	84	81.8157348
0	8.604049985	0	2.829513578	0	3.498495788	0	6.023897166	84	83.65198763
0	4.716940389	0	3.707432033	0	4.17131295	0	3.700787987	84	84.08457313
0	9.572438272	0	9.578524196	0	7.049103278	0	6.206663631	84	84.2975777
0	7.280937118	0	9.412488564	0	7.18764977	0	7.084564939	84	83.74074738
0	6.363586957	0	8.000723327	0	8.181964501	0	5.62920341	84	83.46991987
0	25.50932099	0	9.158944544	0	5.009269663	0	24.44467162	84	83.85072333
0	10.22523946	100	53.25709541	100	55.76702933	0	40.85557604	0	1.694986326
0	0.824320023	100	95.16462168	100	81.91273375	0	23.48650794	0	0.541102986
0	0.88837622	100	94.25547661	100	50.99139881	0	48.56439327	0	1.690037071
0	2.100480769	100	89.86233211	100	87.79581829	0	14.74092409	0	2.022839506
0	1.073563218	100	73.29156863	100	54.25682243	0	35.32972323	0	2.462103354
0	7.252101106	100	84.54151404	100	73.79346951	0	23.135604	0	1.482130282
0	15.98724474	100	85.88469136	100	87.26619353	0	9.255550712	0	13.10158128
0	5.602028057	100	89.77975309	100	55.6672088	0	24.24576195	0	3.802797513
0	4.382222222	100	94.46809816	100	84.16086296	0	12.30659239	0	5.734109221
0	5.372606798	100	85.2731596	100	91.36174589	0	8.968819081	0	3.585807656
0	5.236324042	100	96.02231481	100	89.60120795	0	11.63236875	0	1.831293129
0	7.829433612	100	93.57159926	100	89.15771852	0	10.1286088	0	19.77482335
99	88.03521383	100	59.29447926	0	18.32815114	0	37.4492596	85	82.28372464
99	89.1187901	100	85.64748342	0	9.204271513	0	6.44556239	85	83.32738731
99	94.77035454	100	87.95515291	0	5.729264264	0	20.22212618	85	84.97245391
99	89.619994	100	71.05853369	0	16.55444835	0	20.27443632	85	84.95518419
99	94.89105019	100	87.2350135	0	8.328348214	0	6.661265165	85	85.19104055
99	91.65540382	100	75.1534142	0	3.836799277	0	16.08451134	85	85.09546124
99	84.40058588	100	81.38196472	0	3.103788573	0	20.62844171	85	84.94345912
99	82.10175126	100	86.15055198	0	8.025752106	0	8.153804977	85	83.48878628
99	82.78632321	100	91.14958225	0	8.942164734	0	10.33558724	85	84.51831333
99	71.86576324	100	75.91569549	0	5.096676118	0	26.9779215	85	85.90527653
99	44.26570223	100	80.54330808	0	18.17923127	0	23.30254237	85	79.08414383
99	79.25536348	100	73.12648673	0	14.59947869	0	11.89867678	85	82.51386606
48	47.34841731	50	69.07021467	52	35.62998129	52	65.52428658	53	67.79694316
48	38.78039574	50	73.71599626	52	20.46734393	52	27.08267628	53	77.41335729
48	38.25707071	50	53.68297872	52	40.07739705	52	47.01739453	53	54.68868732
48	28.39804461	50	61.04187921	52	33.31579109	52	45.25818127	53	63.11442644
48	29.02962458	50	60.65020522	52	36.01851852	52	45.5732444	53	41.27225826
48	42.68244602	50	54.87917054	52	41.86035486	52	46.8009587	53	64.22335778
48	32.77750604	50	58.7271149	52	39.87800234	52	44.7140359	53	51.15338142
48	37.17529044	50	55.24530453	52	47.88601515	52	48.91036676	53	45.21046051
48	33.34716093	50	57.82926941	52	35.84092676	52	45.28228215	53	60.69314001
48	28.45622162	50	59.15884639	52	30.86762504	52	49.06043544	53	60.26351801
48	43.86512593	50	47.15996956	52	44.09832551	52	53.8944243	53	52.64124088
48	55.75762608	50	47.18099148	52	40.14136877	52	50.50113501	53	64.72228517
0	10.23978295	0	23.71728958	0	38.92872405	99	78.80770411	91	82.03907942
0	28.15433689	0	29.64135916	0	30.04429825	99	59.59890836	91	76.98594952
0	27.65946617	0	15.46425703	0	56.810403	99	72.18610092	91	69.9316895
0	20.8304493	0	4.564354354	0	12.33080944	99	83.95671057	91	87.86647217
0	16.22146764	0	13.31239977	0	37.03760087	99	67.93587941	91	87.80753132
0	18.37823905	0	9.429035639	0	17.88479297	99	73.47373089	91	83.16314681
0	6.712592593	0	2.217678182	0	8.999158092	99	56.36745255	91	87.56985494
0	8.625376648	0	3.386000589	0	12.64699032	99	78.67416667	91	88.57016253
0	10.58945185	0	2.222801451	0	13.32863871	99	69.74740399	91	87.58692516
0	12.19680345	0	5.024587021	0	6.025058173	99	76.44003623	91	86.54101019
0	26.61152146	0	29.27151052	0	9.83440764	99	56.03713836	91	83.59199882
0	29.18004208	0	52.15105105	0	22.40442238	99	62.5286539	91	80.01134557
0	26.3197013	0	24.16338177	100	86.87579477	0	7.714472498	81	85.69456124
0	18.82014277	0	17.28236802	100	94.5289529	0	28.22327485	81	82.79081293
0	10.59663375	0	7.751379845	100	90.63662058	0	7.745336323	81	83.03018754
0	7.688543599	0	14.15257827	100	85.43215025	0	6.512378788	81	82.53994638
0	9.280047577	0	7.604590643	100	90.86281815	0	17.11486734	81	83.11031527
0	5.057610962	0	5.220793093	100	94.06609403	0	3.562592593	81	82.06321676
0	11.81467487	0	6.831274246	100	78.09575134	0	11.07160268	81	83.38346377
0	8.171441125	0	13.41097599	100	82.84252407	0	2.867788899	81	81.18350122
0	3.335950662	0	4.753939674	100	69.75588411	0	6.526883196	81	84.60210328
0	16.70544701	0	36.68532316	100	53.5659132	0	20.16130844	81	86.52586008
0	15.25517345	0	19.18321984	100	48.75523894	0	27.13883303	81	86.57114074
0	19.24649971	0	21.8504893	100	33.98366727	0	44.56046083	81	87.09305805
96	72.77020013	97	76.78644874	99	98.71645062	0	3.33918552	91	88.74485035
96	66.1683686	97	88.85100548	99	97.64228879	0	2.274045802	91	88.73371047
96	90.3429567	97	93.68381791	99	96.90823512	0	0.557971014	91	90.53215793
96	89.02686703	97	93.89423998	99	97.60262832	0	0.313507038	91	90.430928
96	83.92865443	97	92.92076431	99	98.28569322	0	1.874420677	91	89.43418446
96	92.95658302	97	93.33207666	99	97.44644263	0	1.339040452	91	90.53839962
96	93.06205357	97	91.07579845	99	98.5852207	0	1.078637201	91	90.30262526
96	85.45059798	97	84.37661266	99	97.64306679	0	2.335246145	91	90.45624418
96	71.28739946	97	84.48497463	99	90.99880629	0	0.636346863	91	90.00536903
96	57.39216224	97	78.3818378	99	97.01675807	0	1.43705036	91	88.29641826
96	67.39875304	97	78.73820961	99	89.29464495	0	4.61693942	91	89.76065698
96	45.4539904	97	70.33185772	99	94.22690672	0	2.28912058	91	87.38504617
0	0.496499239	110	105.9087879	0	0.713944396	0	0	0	6.486186186
0	1.108844765	110	107.6073392	0	0.755810533	0	0.326660601	0	4.311544205
0	1.691468777	110	102.6199087	0	1.764760148	0	1.480729626	0	4.647781775
0	0.473128945	110	108.8054717	0	0.56255814	0	0.035121328	0	4.406691222
0	0.457623948	110	105.4949897	0	1.23416065	0	0.016619452	0	4.926875934
0	0.642761266	110	108.9659381	0	0.186824529	0	0.141885766	0	1.260145587
0	11.55631096	110	99.92719599	0	1.348387097	0	0.327209099	0	2.9488
0	0.460721868	110	107.3263704	0	3.670393748	0	1.109953298	0	3.689732143
0	9.12473357	110	107.8234242	0	1.901339286	0	0.889019964	0	4.503543647
0	1.444054054	110	108.2224471	0	1.254727273	0	0.880395683	0	3.546548673
0	2.336926058	110	106.1166813	0	6.970468653	0	2.827741935	0	24.39854427
0	11.74631309	110	91.79553991	0	17.87203755	0	1.733395005	0	22.28492344
