# Supplementary material for: Quantifying BTEX in aqueous solutions with potentially interfering hydrocarbons using a partially selective sensor array
Source: Royal Society of Chemistry journal article supplement (doi:10.1039/c5an00223k), 2015-01-01
Supplement: c5an00223k2.csv [file c5an00223k2.csv]

BT	BPall	TT	TPall	ET	EPall	XT	XPall	NT	NPall
84	92.89079466	0	0	0	0	0	0	0	0
84	94.51382979	0	6.100806452	0	0	0	0	0	0
84	99.53126214	0	0	0	0	0	0	0	0
84	84.36033812	0	0	0	0	0	0	0	0
84	65.30949447	0	2.274954628	0	0	0	0	0	0
84	75.16362136	0	2.069614299	0	0	0	0	0	0
84	71.32648181	0	0	0	0	0	0	0	0
84	79.82454308	0	21.72	0	0	0	0	0	0
84	86.75864593	0	0	0	0	0	0	0	0
84	83.87963314	0	1.649484536	0	0	0	0	0	0
84	86.39031429	0	1.023722628	0	0	0	0	0	0
84	91.56987473	0	0	0	0	0	0	0	0
120	95.59498141	0	0	0	0	0	0	0	0
120	111.6783178	0	0	0	0	0	0	0	0
120	107.4475588	0	0.098920863	0	0	0	0	0	0
120	108.6439722	0	0	0	0	0	0	0	0
120	107.5803058	0	0.294642857	0	0	0	0	0	0
120	86.62472527	0	0	0	0	0	0	0	0
120	100.8420732	0	2.645698427	0	0	0	0	0	0
120	95.18762157	0	0	0	0	0	0	0	0
120	94.98331767	0	5.869365225	0	0	0	0	0	0
120	103.8235744	0	0	0	0	0	0	0	0
120	103.0189261	0	0.098743268	0	0	0	0	0	0
120	100.460274	0	0	0	0	0	0	0	0
0	22.58622653	100	75.07623318	97	89.80153509	96	90.51278643	94	94.78218284
0	15.11601869	100	88.42920354	97	93.15756098	96	93.50739383	94	94.16039511
0	13.54939422	100	91.78783784	97	94.91552198	96	94.15730303	94	94.1399635
0	7.073107089	100	97.76207303	97	96.64272971	96	95.6480498	94	94.13431193
0	1.285192012	100	99.28825623	97	96.65424165	96	95.8190027	94	94.00678119
0	5.0976	100	92.67649857	97	95.84128823	96	94.79054096	94	94.54835847
0	11.00969388	100	97.83274127	97	96.68610864	96	95.67368186	94	94.16859206
0	4.48619697	100	96.42200474	97	96.07029837	96	95.48013393	94	94.2779982
0	3.033843686	100	96.97463768	97	96.23247978	96	95.44980159	94	94.14042553
0	1.658906202	100	98.85014749	97	96.79396092	96	95.82002195	94	94.05071942
0	12.15817666	100	96.8629326	97	96.21040724	96	95.17327942	94	94.24213894
0	3.827846608	100	92.2766365	97	95.85663507	96	95.06437967	94	94.36096257
98	94.2051995	98	96.39750223	0	3.999647023	94	77.05453271	0	3.067274939
98	92.67806625	98	94.37733824	0	15.43641354	94	84.82176525	0	1.308707608
98	95.20168835	98	96.18547009	0	17.485383	94	83.54877225	0	2.672922252
98	95.35165794	98	97.46691753	0	9.000137363	94	87.53835517	0	1.47385159
98	97.3329432	98	97.44990958	0	5.856074343	94	86.4040204	0	1.77192029
98	91.00926611	98	95.68339635	0	35.24005087	94	88.03832891	0	1.125612745
98	95.69056777	98	96.32535626	0	22.23711777	94	85.37976415	0	0.679501217
98	96.65293679	98	97.0591109	0	8.099496296	94	81.65247302	0	1.524215247
98	96.09474012	98	94.8095735	0	9.98040724	94	79.51418408	0	4.298987982
98	96.52166076	98	97.06812785	0	8.083968401	94	75.20140432	0	1.334493965
98	89.2810308	98	92.13790347	0	18.20038545	94	43.05934848	0	0.926391382
98	79.33592456	98	95.54842683	0	8.869155354	94	72.52585432	0	5.310451453
51	50.91778382	48	45.45837887	47	44.00649009	47	49.29976852	44	56.4595942
51	51.12620526	48	47.68962351	47	46.92719939	47	47.33676599	44	47.38674948
51	49.27775746	48	46.79474074	47	45.52471111	47	48.2948223	44	56.09669447
51	51.34106735	48	47.8011236	47	47.3154196	47	48.21004902	44	44.95400239
51	51.24565482	48	47.86359937	47	45.85745931	47	49.86634964	44	45.86059545
51	53.05473637	48	46.1733694	47	49.79356436	47	51.43878146	44	42.9161974
51	52.68389191	48	47.27585432	47	57.63008539	47	47.4569555	44	44.20217588
51	51.43311808	48	47.67663594	47	47.32717485	47	48.23535769	44	49.22744384
51	50.38953052	48	47.91690141	47	47.89048032	47	47.85693297	44	48.43348471
51	52.40350396	48	47.7344031	47	46.51471354	47	49.36189358	44	45.31428571
51	57.6107078	48	44.57598485	47	52.10359447	47	51.60619872	44	47.84743701
51	53.66890941	48	47.31174033	47	47.82473266	47	48.74358169	44	45.17537155
0	27.7438879	0	7.319569203	77	80.43	78	83.67934251	0	1.270794393
0	11.99765578	0	4.513162791	77	79.40603217	78	79.91183686	0	1.007427213
0	34.79094334	0	3.063019432	77	84.93025859	78	86.46660494	0	0.836931311
0	23.16462168	0	3.673572496	77	77.56873648	78	81.25536141	0	2.144911504
0	17.90143336	0	0.583710066	77	82.05180098	78	81.58499551	0	1.690424242
0	21.19865544	0	6.191494459	77	77.06617916	78	80.43286219	0	5.269965113
0	15.57011548	0	3.827959927	77	75.00542151	78	79.72924614	0	1.546238426
0	34.65275271	0	2.1971518	77	80.85386218	78	83.05759892	0	4.22369816
0	51.09466729	0	3.880709469	77	87.73013421	78	89.74804916	0	0.990221402
0	25.38760255	0	10.3161931	77	72.4115903	78	80.09713589	0	3.266362808
0	39.19493284	0	1.239038634	77	85.96519345	78	85.3704649	0	1.997080292
0	32.72544819	0	20.09895366	77	69.66811141	78	79.46107556	0	13.76510417
110	84.9137971	0	12.9125	100	94.88980815	100	93.33399083	0	5.286851852
110	104.3891984	0	2.879651826	100	97.85193322	100	98.64641097	0	2.917338108
110	99.67382488	0	6.288783977	100	91.34069149	100	96.34354982	0	4.190772991
110	94.39239901	0	6.445669056	100	95.90232699	100	97.98844525	0	7.852545455
110	98.26482655	0	3.323531175	100	96.85841845	100	97.55313927	0	3.973509102
110	100.1141585	0	6.53537851	100	87.08346549	100	92.65546026	0	22.09798697
110	38.23905921	0	2.777676121	100	87.42316209	100	87.1306761	0	0.160983103
110	75.98483643	0	3.646548054	100	95.15410584	100	94.77294136	0	2.279356406
110	47.97592931	0	2.485312307	100	86.92650399	100	87.20593648	0	0.736624776
110	70.59992492	0	4.003161449	100	93.74850949	100	93.85017544	0	2.943890866
110	52.33334823	0	3.994245142	100	85.09818267	100	86.78145929	0	6.357738647
110	38.2849697	0	15.97108968	100	76.23592593	100	79.44983318	0	13.51415525
91	87.48650278	87	86.32562278	0	0	0	0	0	0
91	81.11144721	87	82.98512686	0	0.080388693	0	0.813852814	0	0
91	79.91690626	87	81.1810219	0	0.464412811	0	7.499730458	0	0
91	89.771537	87	86.88923077	0	0	0	0	0	0
91	89.02898356	87	85.85097859	0	0.019777778	0	0.85359116	0	0
91	83.21330902	87	76.24426556	0	0.205291971	0	1.53963964	0	0
91	87.17271505	87	86.9295814	0	0	0	0	0	0
91	86.77251082	87	76.76249265	0	0.355816227	0	0.763537906	0	0
91	86.16865044	87	84.80655738	0	0.081834532	0	0.08348135	0	0
91	87.63074274	87	74.8628979	0	0.272686833	0	0.433579336	0	0
91	90.11258784	87	86.73342318	0	0	0	0	0	0
91	85.29113219	87	84.91344538	0	0	0	0.331862312	0	0
91	91.94133585	88	88.48360932	84	66.65576647	0	10.03268278	0	2.917204812
91	90.40655465	88	87.33421467	84	67.01354261	0	15.2638502	0	1.607680492
91	91.45236626	88	88.47192671	84	74.72447531	0	6.943204182	0	0.139727649
91	91.41787241	88	88.63031716	84	74.53984974	0	9.061347197	0	0.115454545
91	89.25785908	88	86.03023572	84	75.68011192	0	20.0972197	0	3.684579871
91	91.78901019	88	88.71629431	84	74.75902778	0	13.6652193	0	0.879796163
91	91.98498335	88	88.36412814	84	79.56557018	0	10.78425842	0	0.147930083
91	91.92884045	88	89.72485299	84	73.82237527	0	42.84153537	0	0.04775023
91	90.91718565	88	88.01347709	84	76.8456743	0	42.10121464	0	0.224014337
91	91.36611161	88	88.69742438	84	71.75793798	0	3.455203479	0	0
91	90.98452269	88	88.35337079	84	80.28113602	0	2.678990826	0	0.273303167
91	90.34870506	88	87.97080346	84	67.26098885	0	3.399353647	0	3.13572711
89	85.25669362	0	3.003140319	82	82.53851784	79	79.45959643	100	100.1288427
89	67.14204774	0	10.81953488	82	87.04874101	79	83.17155963	100	101.4757194
89	87.00592324	0	2.891802291	82	82.84874101	79	79.58835395	100	100.1653023
89	80.27372855	0	1.551466188	82	82.40962761	79	79.72813753	100	99.91606464
89	79.49550926	0	3.931954436	82	82.91807832	79	80.25828045	100	99.95448833
89	72.84103376	0	12.58277087	82	83.44027531	79	81.70311471	100	99.19306569
89	80.75831146	0	10.39028822	82	83.73636364	79	80.79926493	100	99.82376627
89	78.89332729	0	14.17535211	82	83.49464495	79	81.25922981	100	99.37446611
89	83.38026802	0	6.560712093	82	82.70665138	79	80.06510989	100	99.86669619
89	84.1437306	0	12.16318955	82	84.08426966	79	81.02247451	100	99.87808814
89	81.83208066	0	9.066666667	82	83.00160698	79	80.64263601	100	99.51384615
89	73.08124428	0	15.71593002	82	86.57356115	79	83.36126697	100	100.1403918
90	70.47024146	87	83.28310185	0	4.189360731	79	80.06663603	100	101.8291291
90	88.7952488	87	86.1860262	0	2.755726872	79	79.08605072	100	100.3424908
90	89.20080264	87	84.68369863	0	4.815726872	79	79.10058401	100	100.1946247
90	85.04851351	87	86.15464458	0	0.702674524	79	78.99261993	100	100.1256387
90	82.02647849	87	84.49848622	0	3.88696562	79	80.88686733	100	103.5098395
90	89.60399257	87	85.99468556	0	1.028193431	79	79.00244011	100	100.2432432
90	89.21419422	87	85.62530747	0	2.888574901	79	78.97014925	100	100.0563636
90	85.88423723	87	83.64488568	0	7.502461059	79	79.86473881	100	100.6126296
90	81.14065004	87	84.23283813	0	4.502963998	79	79.16201657	100	100.2982774
90	85.51379011	87	84.14290459	0	16.53100457	79	79.56012658	100	100.7650123
90	75.83608631	87	82.69162096	0	15.84214154	79	80.14033175	100	102.7771392
90	57.8121065	87	59.20036664	0	16.69036126	79	82.47801451	100	105.4901522
110	104.3525459	0	11.61634438	0	4.859779736	0	1.526430518	80	86.18923099
110	103.6363128	0	5.396604361	0	5.008510953	0	0.576835138	80	81.36784859
110	105.8300606	0	0.694603175	0	2.084256694	0	0.358756567	80	81.17444249
110	108.1793814	0	2.464629466	0	2.248859489	0	0.785466179	80	80.03792998
110	109.402618	0	0.756073059	0	1.641726944	0	0.33113879	80	81.67149477
110	109.6677244	0	1.087714461	0	0.946983831	0	0.223656388	80	80.98051852
110	107.6963403	0	1.410802188	0	4.492384005	0	0.331430271	80	82.47234568
110	109.409244	0	3.601666667	0	4.092903416	0	0.193386953	80	80.57643678
110	106.692803	0	11.56765444	0	2.582285115	0	0.627949183	80	81.45856882
110	100.2723469	0	6.18687441	0	1.29650514	0	0.387061404	80	83.33736607
110	108.199522	0	4.858664204	0	1.117800968	0	0.67128655	80	82.1530262
110	107.6357764	0	1.926640188	0	0.867045455	0	0.05399061	80	82.26405622
100	92.16870287	0	0.705693297	91	85.68539039	0	0.624200913	0	0
100	98.78336358	0	0.950508788	91	90.24001156	0	0.31757971	0	0
100	96.86059219	0	0.384545455	91	88.11776972	0	0.426702034	0	0
100	91.45756315	0	0.481300089	91	88.85476619	0	1.002798165	0	0
100	95.68036711	0	0.084153984	91	84.99123989	0	0.396684119	0	0
100	94.26369967	0	5.285202492	91	89.43738221	0	0.829081178	0	0
100	98.49110092	0	0.908723022	91	88.63063725	0	0.83128945	0	0
100	97.23492344	0	3.042645779	91	88.48806584	0	0.244342105	0	0
100	94.76177856	0	0.157039711	91	90.2377658	0	0.013884007	0	0
100	94.78921053	0	0	91	84.93977695	0	0.320922939	0	0
100	97.37810242	0	4.190922619	91	87.90228038	0	0.842715827	0	0
100	95.66294326	0	0.749956179	91	87.01467639	0	0.369781222	0	0
0	43.02087021	0	0.085688241	67	50.08036044	0	38.14355275	0	0
0	25.70065593	0	0	67	62.83862654	0	29.09671533	0	0
0	20.89025359	0	1.730275229	67	64.56087751	0	3.478679465	0	0
0	41.07479496	0	2.090009001	67	48.54694245	0	17.53290986	0	0
0	16.55472995	0	2.757307214	67	46.06229058	0	20.6645493	0	0
0	9.952315255	0	3.542830882	67	64.02806935	0	4.119388686	0	0
0	5.673298276	0	0.02130553	67	66.32821918	0	3.648746177	0	0
0	5.529374615	0	1.274560592	67	61.29584115	0	5.821773445	0	0
0	23.52937703	0	0.082819383	67	69.28652968	0	16.89922583	0	0
0	20.35691506	0	0.083704363	67	45.33579616	0	18.06935281	0	0
0	4.001760777	0	0.241666667	67	65.39280198	0	12.78115478	0	0
0	11.49241735	0	0.313931298	67	67.45964444	0	4.980117754	0	0
0	25.63312005	83	68.65499101	76	77.65123733	75	76.95224417	0	1.286335605
0	31.45713845	83	76.39690848	76	78.45510234	75	77.73424376	0	4.062466726
0	17.06223011	83	70.20128802	76	72.83083188	75	70.95212922	0	4.348959276
0	14.4030558	83	74.48406337	76	75.87077465	75	75.77763975	0	1.322261484
0	23.47830688	83	73.99940316	76	75.03772401	75	75.63255605	0	3.920609792
0	13.30666371	83	70.61256637	76	76.66726819	75	76.04112554	0	0.13909465
0	18.68044753	83	81.47056476	76	75.02094017	75	75.77335124	0	2.841297134
0	18.29346786	83	75.07149892	76	69.98224826	75	65.61730361	0	11.66306466
0	9.02004317	83	81.79330613	76	76.27671459	75	75.6705301	0	0.312922705
0	10.09521422	83	81.78192789	76	76.28171708	75	75.46494358	0	0.783123123
0	27.45112032	83	72.87662455	76	68.66074523	75	68.69935958	0	15.11705535
0	44.50473827	83	71.23801802	76	75.91897573	75	77.29858156	0	3.29685304
51	44.1814997	50	56.8013242	44	50.52804917	44	48.09900181	52	42.33321471
51	43.36156561	50	57.50221555	44	48.90038367	44	49.8800845	52	42.63936493
51	42.07575897	50	57.56312825	44	54.15092511	44	49.75998249	52	43.64832459
51	51.00094541	50	55.28766487	44	48.55391278	44	41.24799011	52	50.35491852
51	43.55235202	50	58.07122324	44	49.43858859	44	46.25097312	52	47.63732986
51	45.36669788	50	56.6788188	44	50.79019608	44	46.37080047	52	42.86370604
51	48.22606528	50	52.86577918	44	46.44466049	44	40.76672938	52	46.09251361
51	49.93927045	50	54.67482592	44	45.25853583	44	42.83789758	52	51.145919
51	52.37916285	50	52.51931954	44	48.27457358	44	46.65590563	52	46.3137473
51	46.89538774	50	59.82675516	44	46.43398723	44	40.50721112	52	52.2821485
51	41.69125612	50	63.80849286	44	58.64664887	44	53.83288868	52	28.8490303
51	54.13440171	50	62.50234082	44	51.80093583	44	48.5204524	52	32.17252713
0	4.300505051	94	92.32837209	0	11.01900183	88	87.19024024	110	109.9492617
0	2.092145949	94	93.85813282	0	1.436962751	88	87.94226988	110	110.0494505
0	0.514124294	94	93.87865662	0	0.607207207	88	88.03770925	110	109.9909307
0	0.087950748	94	93.94014337	0	3.191839495	88	87.61117117	110	108.6085415
0	0.719152855	94	93.72451791	0	0.47251773	88	87.92071678	110	109.822376
0	0.484788479	94	94.04306569	0	5.686579501	88	87.91222826	110	109.8514188
0	23.0650722	94	93.94831528	0	3.220890937	88	86.60803465	110	110.2353655
0	1.404315197	94	93.92980857	0	0.596943231	88	88.0635514	110	110.0013562
0	0.183303085	94	93.86341463	0	0.375578168	88	88.00356816	110	110.0075088
0	12.73021893	94	89.99698276	0	5.404428268	88	87.57762557	110	112.1777778
0	2.566219614	94	95.75880759	0	4.122738203	88	85.85809793	110	109.9838758
0	1.907616893	94	95.22899584	0	5.951638577	88	84.29821269	110	109.4571893
100	75.23786776	0	17.65873239	0	25.70174878	79	58.66625623	0	0
100	54.66359975	0	10.50384395	0	24.80899786	79	59.41194853	0	0
100	66.70428954	0	41.40981651	0	11.64522358	79	64.04566311	0	0.126811594
100	75.5987364	0	13.02000621	0	22.88111208	79	63.39028513	0	0
100	38.11392483	0	36.12731897	0	37.01313177	79	47.21683817	0	0
100	86.17538146	0	0.590666667	0	9.663425926	79	70.05514812	0	0.251121076
100	74.2569744	0	4.385832619	0	4.997711214	79	73.14553794	0	0
100	81.77522232	0	2.714766759	0	8.059371293	79	72.77639269	0	0
100	61.9721393	0	2.222835596	0	12.09778532	79	58.78863287	0	0
100	77.04134585	0	4.422093713	0	7.326100352	79	72.11435185	0	0
100	77.21358025	0	2.709446936	0	7.994341085	79	73.04973357	0	0
100	24.73279714	0	27.17266605	0	37.27629022	79	52.43993487	0	0
0	18.40772472	0	2.536163522	93	92.31862917	94	91.94486949	120	117.6561372
0	3.002527076	0	6.685131894	93	91.85906433	94	93.69451923	120	119.9805137
0	17.84102679	0	22.46458894	93	88.3336815	94	93.54551111	120	119.4612645
0	17.45789552	0	6.007787141	93	90.33620638	94	91.27516494	120	116.6422141
0	43.69794664	0	7.484057971	93	91.75118259	94	90.7651715	120	114.922657
0	9.705397987	0	2.10894597	93	91.3615458	94	93.54094669	120	120.6817907
0	4.078500452	0	9.953761062	93	79.07001515	94	92.62714544	120	117.9133209
0	1.805340873	0	6.038616136	93	91.71086754	94	93.6936019	120	119.7813911
0	2.621480429	0	0.750539568	93	91.41597029	94	93.77457169	120	119.9075786
0	3.235119048	0	15.85457875	93	92.56141338	94	93.59325069	120	120.272045
0	15.2857122	0	12.14684015	93	91.61217442	94	92.65835556	120	119.6832445
0	16.90534997	0	11.16998192	93	57.86547401	94	90.00001491	120	115.9219467
0	2.553960396	0	0.130922242	0	8.794894627	0	0.590134529	0	0
0	21.01591044	0	67.00182815	0	0	0	0	0	0
0	10.86588235	0	0.684444444	0	0	0	0	0	0
0	5.034932127	0	0	0	0	0	0	0	0
0	32.53683241	0	0	0	0.05887522	0	0	0	0
0	4.900725953	0	0	0	0	0	0	0	0
0	21.60882883	0	0	0	0	0	0	0	0
0	2.817162872	0	0	0	0	0	0	0	0
0	26.09439728	0	0	0	0	0	0	0	0
0	55.23123878	0	0.097431355	0	0	0	0	0	0
0	3.320220588	0	0.049648815	0	0	0	0.083853702	0	0
0	21.515625	0	0.095735422	0	0	0	0	0	0
100	83.651997	93	49.20613536	92	61.57844523	93	88.3375	0	74.50454677
100	94.63732394	93	79.29315422	92	73.11788012	93	82.52227693	0	24.47920315
100	90.51822303	93	82.81838078	92	82.04522692	93	90.64032063	0	13.86366812
100	92.02777285	93	91.28866483	92	84.13645562	93	90.38880486	0	7.286776983
100	78.43621307	93	87.17044843	92	87.42609227	93	88.06601515	0	0.893670886
100	84.52447489	93	85.41251949	92	84.6923221	93	88.61191158	0	8.154019874
100	88.68463794	93	88.94933271	92	86.20346566	93	87.61198055	0	13.46240757
100	93.74809741	93	90.86337658	92	87.92894338	93	88.37512101	0	7.835769459
100	86.12630185	93	85.57471008	92	87.77619488	93	89.74653223	0	2.009052758
100	89.3834868	93	87.64907975	92	81.74550562	93	87.37244767	0	5.520713429
100	83.65299491	93	87.20790101	92	77.53052569	93	85.75755232	0	13.0238825
100	86.86187773	93	88.45353579	92	85.06746032	93	81.69350255	0	5.493287237
100	98.40423327	0	2.459606061	0	18.75794378	98	88.49243401	120	115.0354057
100	97.31301989	0	1.734641998	0	17.35975836	98	88.25877032	120	120.2819686
100	99.68823801	0	2.768777877	0	19.48871887	98	90.35775085	120	116.6113533
100	99.48884758	0	0.899625468	0	7.490933817	98	90.54862781	120	120.5004348
100	96.20383397	0	3.918404635	0	13.85069951	98	88.37073611	120	116.5996896
100	97.94182306	0	4.814923168	0	6.394928174	98	90.79432465	120	115.5080416
100	97.62215152	0	13.38139609	0	2.28	98	87.52218268	120	120.5173488
100	98.58246734	0	5.105120024	0	4.142990373	98	92.16611459	120	119.6853999
100	98.72738424	0	6.906450216	0	3.248788715	98	92.64842652	120	120.0281668
100	95.02030615	0	7.201736719	0	8.801066423	98	83.67448391	120	118.5645014
100	99.00881057	0	3.553466287	0	7.768435013	98	93.84232012	120	120.1526684
100	99.46011526	0	3.00567867	0	6.91842919	98	93.86252252	120	120.2321942
0	71.01568901	110	81.43257979	0	12.62533578	0	7.531762169	160	102.2689205
0	68.25529553	110	78.94348485	0	21.52888499	0	5.116359918	160	110.3703252
0	10.87273672	110	105.5054041	0	0.32117737	0	0.476746242	160	145.9876163
0	4.981686859	110	102.4718272	0	0.8119594	0	1.76485539	160	149.2381788
0	6.064867257	110	108.1423851	0	0.216271583	0	0.513161132	160	155.4519507
0	5.721279331	110	104.8825509	0	2.830274946	0	2.250089445	160	143.6101043
0	47.71532017	110	103.8719258	0	2.268583043	0	2.121791559	160	139.2925016
0	34.21027523	110	107.5636927	0	0.374418239	0	0.41511772	160	151.2178625
0	47.2297257	110	106.5620822	0	0.348471087	0	0.439501882	160	147.1735147
0	13.50244115	110	106.1192101	0	0.32537155	0	0.421295419	160	148.9867323
0	12.81748197	110	86.82519276	0	9.760733696	0	10.75243343	160	119.7846898
0	47.83634893	110	101.9407072	0	1.130077519	0	1.027461608	160	135.9822737
0	5.190599078	110	108.2199052	110	104.8110713	0	4.08140166	100	102.8480349
0	1.591607355	110	109.068582	110	106.9287698	0	2.852580449	100	100.44604
0	4.743958713	110	109.3606285	110	108.7920883	0	1.879823762	100	100.4507892
0	4.238342441	110	108.6325646	110	92.34598411	0	2.460801915	100	100.5346704
0	25.36763216	110	107.5737855	110	109.4579308	0	1.553778982	100	101.3629182
0	2.184368341	110	109.6480804	110	104.2303852	0	4.834103261	100	100.7680965
0	4.614915459	110	108.5811659	110	104.1275755	0	34.98591426	100	101.6375763
0	4.742311192	110	109.6606285	110	109.5185185	0	2.307101727	100	100.465088
0	18.70506982	110	109.4409881	110	109.6284672	0	1.843572045	100	100.4572907
0	13.1354963	110	109.5967712	110	100.1581227	0	0.711341757	100	101.0475347
0	29.07922705	110	90.31164216	110	109.032325	0	0.172694394	100	103.9121352
0	27.31850449	110	108.7060465	110	88.47349235	0	15.12859568	100	103.4421801
0	5.273391544	0	5.500904159	0	11.96378676	94	84.55568075	0	0
0	4.955159475	0	2.385566038	0	1.698398001	94	87.14744852	0	0
0	5.75579445	0	4.446718705	0	0.122823098	94	67.43761905	0	0
0	4.953794163	0	1.906690141	0	2.297867154	94	90.95599442	0	0
0	1.795667244	0	1.111160714	0	0.655477032	94	81.62196834	0	0
0	6.697952167	0	4.528152753	0	5.079777778	94	74.08981649	0	0
0	2.320477423	0	0.780269058	0	0.058448118	94	84.68178365	0	0
0	8.925114995	0	5.771063961	0	1.428181818	94	75.16229241	0	0
0	2.522393472	0	0.892047532	0	0.526946753	94	91.1301737	0	0
0	0.439663237	0	0.286678668	0	1.947320618	94	81.12692308	0	0
0	25.26382503	0	6.697595431	0	4.371347972	94	78.20782063	0	0
0	1.890917603	0	3.156505914	0	1.760416667	94	52.66223317	0	0
98	96.16240458	92	87.70695954	92	91.35440141	92	91.82304094	130	128.658296
98	97.48605072	92	89.70609351	92	91.91899393	92	92.00110006	130	129.9356026
98	96.44291271	92	86.0360671	92	92.02362345	92	92.06750381	130	129.7887324
98	91.53161833	92	91.7265625	92	91.72037037	92	92.05253261	130	129.4555454
98	91.22144186	92	90.64189189	92	91.76114082	92	92.04237833	130	129.4419442
98	90.0861618	92	91.90175742	92	91.47655193	92	91.9137396	130	128.393597
98	95.00606852	92	85.40754042	92	91.93701657	92	92.02090239	130	129.2595281
98	95.63388128	92	90.3082049	92	91.93333333	92	91.96033147	130	129.6050269
98	89.83732116	92	90.6489011	92	90.57195864	92	91.97166378	130	129.281768
98	92.72421442	92	89.48060472	92	90.21867634	92	92.019773	130	128.5261757
98	83.14220799	92	89.8127551	92	92.02777778	92	92.15955056	130	128.5401348
98	90.23005592	92	90.63922619	92	92.19930253	92	89.92513129	130	128.4308349
0	3.273321397	92	90.57480339	0	17.86093892	87	68.31215186	0	0
0	2.206832872	92	90.76168027	0	16.4970478	87	72.84173762	0	0
0	0.538144983	92	91.89513382	0	8.277495379	87	77.22267785	0	0
0	0.944101206	92	92.14946038	0	23.70870003	87	59.39162234	0	0
0	1.029368576	92	91.6130303	0	12.36649306	87	76.53993209	0	0
0	0.5228471	92	92.11082803	0	29.23232877	87	65.38402349	0	0
0	1.162162162	92	91.90218628	0	34.45815074	87	49.17683075	0	0
0	1.225845411	92	91.01771689	0	33.68290676	87	50.80819572	0	0
0	7.491007194	92	86.74924638	0	15.61041852	87	72.20489268	0	0
0	4.92013261	92	90.38024159	0	27.01054965	87	66.61140351	0	0
0	10.98834664	92	86.8052924	0	25.93564103	87	57.11173643	0	0
0	1.960675883	92	89.64681239	0	36.96237579	87	55.36009541	0	0
100	98.97150786	0	0.344198895	94	93.02442396	0	0.300287632	130	128.9810103
100	95.79870072	0	2.38372799	94	80.06272464	0	3.164963504	130	128.2113147
100	97.20319776	0	1.149541149	94	93.04616948	0	0.529049774	130	129.7733161
100	99.50306442	0	0.782074613	94	93.70569522	0	1.783666062	130	129.1252884
100	98.35718207	0	1.404293629	94	93.25038052	0	0.237253057	130	129.6819913
100	88.88313866	0	3.903433607	94	94.60891365	0	1.609189189	130	128.1153575
100	92.81325088	0	1.161251504	94	93.03382625	0	0.939775669	130	129.2164404
100	89.53438395	0	3.032198002	94	91.98679359	0	0.285201794	130	123.4969754
100	96.6705279	0	1.830149477	94	91.84045849	0	3.104871324	130	129.1017336
100	90.65132325	0	2.941460642	94	87.30843806	0	6.420729837	130	127.4959541
100	96.38663227	0	0.47073321	94	90.71316577	0	4.58704028	130	127.1603791
100	93.68955618	0	1.939699074	94	91.79099016	0	1.924119241	130	126.8248553
0	0.700314748	0	2.034947724	0	2.092859246	0	1.179919499	140	138.5325602
0	7.156240556	0	13.95124066	0	5.024495413	0	13.49735663	140	129.493994
0	2.200659755	0	5.746289482	0	4.675320513	0	3.062946295	140	131.7460232
0	2.763136574	0	2.744012797	0	0.605705301	0	0.791427247	140	126.629386
0	2.386093418	0	5.55708061	0	2.718009768	0	3.253813038	140	137.9725421
0	7.181217418	0	6.169449541	0	1.846537396	0	3.050762527	140	135.3957219
0	3.25088685	0	4.348890861	0	1.948191095	0	3.396961729	140	120.7856823
0	1.901988195	0	6.908086876	0	3.679552955	0	1.782980681	140	136.003639
0	2.116709659	0	2.442009933	0	2.001146221	0	3.097146219	140	109.0445247
0	1.335833333	0	4.509183981	0	1.306349206	0	3.706449612	140	127.5024405
0	1.848077505	0	1.613943662	0	1.315779817	0	2.245411061	140	134.9723757
0	1.871895124	0	6.347911111	0	1.280485232	0	2.704667256	140	130.5370963
0	9.559144677	94	69.866997	89	29.41063961	0	30.88234827	0	0.495479204
0	10.33447073	94	67.44492945	89	48.58297809	0	18.82183333	0	0.196253345
0	7.938275547	94	88.13417289	89	55.30488428	0	29.87771588	0	0
0	2.37845706	94	90.02228344	89	37.67435775	0	35.59897554	0	0.397470641
0	6.149138991	94	85.62176435	89	53.42319295	0	26.0503124	0	0
0	6.571981331	94	73.42627694	89	49.57247679	0	36.2945098	0	0
0	16.0264534	94	63.44328106	89	33.08022624	0	30.83217762	0	21.15307414
0	15.90157597	94	75.50669753	89	68.72345797	0	27.20311951	0	0
0	22.73740134	94	28.45845048	89	58.93915644	0	41.95972349	0	0
0	8.496896338	94	81.24598627	89	50.82150681	0	36.06302869	0	0
0	19.76344086	94	62.35859492	89	51.78283349	0	33.99720379	0	0
0	15.94649519	94	43.34294099	89	50.73943765	0	44.71134585	0	0
102	69.06572727	100	84.86408766	0	21.21784297	0	8.310267472	84	102.0398276
102	79.46260529	100	97.294773	0	7.314626775	0	2.079665145	84	88.1578024
102	90.18302305	100	91.78910082	0	12.03081047	0	3.720177074	84	91.89888164
102	87.4573178	100	100.5807563	0	1.936222222	0	1.49689441	84	102.6194895
102	57.1319873	100	97.82439324	0	0.626931949	0	0.41037851	84	109.9291274
102	76.06352002	100	100.2982572	0	2.180879346	0	2.571023575	84	98.05151248
102	34.77963781	100	93.17616208	0	0.880500301	0	0.476190476	84	113.1601664
102	76.54804185	100	100.1291097	0	0.367450271	0	0.707639485	84	89.52757202
102	90.19274705	100	98.50747398	0	0.768395945	0	1.316123188	84	86.0533701
102	78.52780641	100	96.63707265	0	1.471113244	0	1.451447288	84	92.12371615
102	91.78303411	100	92.48590335	0	5.229188869	0	2.791810215	84	89.17938113
102	76.90200935	100	100.8672974	0	0.165796233	0	0.676599634	84	105.9188879
49	43.63565179	53	48.87268761	55	52.73115873	58	53.06549655	75	76.45817352
49	48.56571299	53	52.69485816	55	54.11509434	58	57.30657778	75	75.2637485
49	46.90809655	53	47.70300117	55	51.16339506	58	55.57494702	75	77.16586174
49	44.91445043	53	48.94461822	55	52.66657492	58	52.05688471	75	81.24150448
49	45.05012001	53	48.28740871	55	38.94231582	58	48.17078189	75	78.91817654
49	42.04604701	53	53.58883241	55	51.93222938	58	54.47229875	75	76.49781329
49	39.13540699	53	51.14334869	55	47.70209075	58	46.85496068	75	79.96961896
49	46.99216992	53	54.40409118	55	51.68336391	58	58.30929809	75	76.87498485
49	47.12168929	53	51.07403403	55	41.76974268	58	52.27233631	75	77.20098566
49	45.59252394	53	51.26529978	55	52.94045746	58	55.35325509	75	75.95056196
49	48.72981919	53	54.44001901	55	50.23439905	58	56.61451109	75	74.84707965
49	46.85741389	53	51.70060006	55	53.13734848	58	55.97609948	75	77.73524835
0	5.637272727	0	2.361012956	0	21.3289783	110	97.69097711	110	109.9486951
0	3.086989721	0	0.300361337	0	10.8473885	110	105.2402204	110	108.8298099
0	2.334782609	0	1.849788647	0	8.374560592	110	102.3317616	110	109.9120504
0	1.506654991	0	3.351875	0	8.202953586	110	103.2996451	110	107.488615
0	0.727551985	0	4.881390407	0	15.21235329	110	92.21308775	110	108.8681074
0	1.499637681	0	1.493789308	0	16.39850015	110	100.4832609	110	109.4205998
0	1.08735119	0	0.222021661	0	18.73915771	110	88.67813717	110	109.8039216
0	0.131435145	0	0.717333333	0	16.82156953	110	97.15125416	110	109.9574332
0	2.959269663	0	2.110548523	0	19.18635514	110	83.68469357	110	108.2257077
0	3.552848379	0	1.045574058	0	15.23098142	110	100.3683749	110	109.7918256
0	0.814465409	0	15.63443847	0	23.37509893	110	81.68497486	110	105.5061909
0	0.511478421	0	10.90491003	0	20.98510259	110	83.55329125	110	107.0075338
0	4.155657492	0	1.518833333	120	97.62982137	0	9.508931777	110	109.8642355
0	1.062271062	0	0.237712243	120	105.6421449	0	6.709093646	110	108.7210471
0	0.643431635	0	0.181983621	120	113.8957802	0	7.557632399	110	110.09
0	34.0015625	0	11.40842167	120	107.850706	0	7.148817204	110	109.6428571
0	2.677203918	0	2.210064839	120	102.90086	0	3.071874054	110	110.8472909
0	0.71186067	0	9.144312652	120	84.24373849	0	7.634978865	110	109.4131698
0	3.828903147	0	2.382772217	120	103.1857527	0	10.35425995	110	109.6793449
0	3.480847145	0	2.017323775	120	108.9609409	0	8.950821089	110	110.6351753
0	1.349318182	0	1.907605029	120	105.2341829	0	8.558876812	110	108.4980571
0	2.182551595	0	2.054151625	120	111.4081025	0	9.408960887	110	109.6688007
0	1.323626853	0	4.141379831	120	85.11625832	0	20.28558897	110	110.0856502
0	0.777160494	0	2.637244898	120	60.52160383	0	33.87032595	110	107.667713
100	84.53422301	100	100.8355019	110	103.4746661	0	4.409930049	110	106.3894783
100	92.8605056	100	98.51355112	110	108.0466606	0	0.184383819	110	109.6636528
100	96.34305037	100	97.23693534	110	103.739152	0	1.73213134	110	109.7618841
100	96.33987284	100	99.849631	110	103.1523637	0	2.20918239	110	109.6563768
100	87.77765616	100	99.87477639	110	102.6119069	0	7.517542349	110	109.6169887
100	85.46338546	100	94.0908684	110	108.7608669	0	4.469828837	110	109.6205152
100	97.86263416	100	97.53906936	110	108.3330394	0	0.008014572	110	109.8837719
100	88.26325898	100	99.98029174	110	109.0749319	0	0.088367899	110	109.6923542
100	79.38560404	100	99.97597043	110	109.0929204	0	0.247202797	110	109.590964
100	96.33849243	100	85.55029105	110	104.2088619	0	0.426679281	110	110.041098
100	94.47777278	100	99.11920798	110	108.0576518	0	0.410065238	110	109.5977173
100	91.21725768	100	97.76959064	110	102.8707107	0	0.49530558	110	109.7478209
0	9.697532588	110	100.3029163	0	0	0	0	0	0
0	4.054170572	110	102.6195166	0	0	0	0	0	0
0	5.809244444	110	103.681777	0	0	0	0	0	0
0	5.096531532	110	108.6056911	0	0	0	0	0	0
0	16.39155436	110	109.5716946	0	0	0	0	0	0
0	17.59138196	110	107.0350559	0	0	0	0	0	0
0	6.324416517	110	105.8009973	0	0	0	0	0	0
0	11.33886411	110	104.3655303	0	0	0	0	0	0
0	9.574465522	110	107.8220641	0	0	0	0	0	0
0	26.06975252	110	106.1226555	0	0.060523939	0	0	0	0
0	9.169196025	110	100.155873	0	0	0	0	0	0
0	17.26676004	110	108.8836231	0	0	0	0	0	0
