# Supplementary material for: Quantifying BTEX in aqueous solutions with potentially interfering hydrocarbons using a partially selective sensor array
Source: Royal Society of Chemistry journal article supplement (doi:10.1039/c5an00223k), 2015-01-01
Supplement: c5an00223k4.csv [file c5an00223k4.csv]

Label	B	T	E	X	N	I	1 (1-2-BDMT)	2 (2-ATP)	6 (2-ATP)	7 (4-NBM)	12 (HEX)	13 (3-ETP)	16 (1-10-DDT)	17 (2-4-DCBT)	18 (4-BBM)	19 (HDT)	20 (1-10-DDT)	21 (2-4-DCBT)	22 (4-BBM)	24 (MOB)	29 (4-MBT)	30 (4-CBT)	31 (1-HEPTT)
B	84	0	0	0	0	0	0.000144075	0.000116818	4.07E-05	1.93E-05	0.00013719	6.14E-05	9.46E-05	0.000120099	0.000120788	6.29E-05	8.23E-05	5.37E-05	8.66E-05	7.52E-05	5.81E-05	7.97E-05	0.000109922
B	84	0	0	0	0	0	0.000154319	4.00E-06	3.78E-05	5.50E-06	5.79E-05	4.56E-05	0.00010923	8.86E-05	9.69E-05	9.79E-05	4.46E-05	3.95E-05	5.82E-05	4.26E-05	7.25E-05	6.11E-05	4.72E-05
B	84	0	0	0	0	0	0.000111628	2.83E-05	2.94E-05	5.81E-06	7.30E-05	7.30E-05	7.75E-05	4.93E-05	0.000103426	7.24E-05	6.99E-05	5.09E-05	7.41E-05	4.58E-05	6.19E-05	4.47E-05	0.000121783
B	84	0	0	0	0	0	0.000136891	3.84E-05	5.29E-05	3.32E-05	8.80E-05	7.79E-05	7.37E-05	9.78E-05	0.000122681	7.66E-05	9.68E-05	6.30E-05	8.55E-05	5.12E-05	6.82E-05	9.31E-05	0.00010926
B	84	0	0	0	0	0	0.000139939	3.19E-05	5.23E-05	7.17E-05	0.000153178	7.72E-05	4.50E-05	7.72E-05	0.000112518	6.31E-05	7.89E-05	7.84E-05	0.000109712	6.76E-05	6.15E-05	7.70E-05	0.000168884
B	84	0	0	0	0	0	0.000129844	0.000109075	6.32E-05	2.74E-05	4.39E-05	7.01E-05	1.13E-05	9.50E-05	0.000107644	4.38E-05	0.000110642	8.46E-05	0.000107814	8.61E-05	7.65E-05	6.32E-05	0.000187691
B	84	0	0	0	0	0	0.000127097	0.000141094	4.22E-05	2.06E-05	-9.05E-06	4.57E-05	0.000112188	0.000106462	0.00010424	3.55E-05	8.79E-05	6.41E-05	0.000102899	7.20E-05	5.92E-05	7.03E-05	2.88E-05
B	84	0	0	0	0	0	0.000191862	0.000106079	4.00E-05	5.45E-05	3.30E-05	9.23E-05	6.90E-05	0.000151757	0.000127957	3.62E-05	9.22E-05	6.58E-05	8.10E-05	6.98E-05	7.43E-05	7.03E-05	0.000115836
B	84	0	0	0	0	0	0.000138278	0.000147639	5.49E-05	7.09E-05	0.000116602	8.97E-05	9.40E-05	9.73E-05	8.89E-05	5.79E-05	8.50E-05	6.57E-05	9.75E-05	7.10E-05	5.51E-05	4.90E-05	2.18E-05
B	84	0	0	0	0	0	0.000106529	0.000116168	6.35E-05	2.75E-05	5.01E-05	5.52E-05	8.75E-05	4.29E-05	7.73E-05	3.03E-05	9.89E-05	8.04E-05	9.50E-05	5.87E-05	4.64E-05	3.65E-05	5.25E-05
B	84	0	0	0	0	0	0.000119238	4.83E-05	4.38E-05	4.53E-05	-8.53E-06	6.20E-05	3.56E-05	3.36E-05	9.71E-05	3.72E-05	6.44E-05	5.98E-05	9.02E-05	6.41E-05	5.99E-05	6.98E-05	0.000282892
B	84	0	0	0	0	0	0.000143899	3.12E-05	2.65E-05	3.96E-05	7.21E-05	3.39E-05	4.14E-05	8.86E-05	9.83E-05	5.22E-05	6.85E-05	6.56E-05	9.24E-05	7.17E-05	4.39E-05	3.99E-05	0.000130557
B	120	0	0	0	0	0	0.00012037	4.15E-05	3.57E-05	4.95E-05	0.000109962	6.49E-05	6.38E-05	4.73E-05	8.44E-05	7.29E-05	4.99E-05	4.78E-05	6.64E-05	5.27E-05	6.41E-05	5.95E-05	0.000142778
B	120	0	0	0	0	0	0.00012309	8.44E-05	2.71E-05	5.44E-07	0.000114949	7.34E-05	7.76E-05	6.63E-05	9.87E-05	6.46E-05	3.58E-05	4.75E-05	6.32E-05	8.48E-05	5.49E-05	6.05E-05	0.000139779
B	120	0	0	0	0	0	0.000131073	8.26E-05	1.53E-05	3.38E-05	0.000173246	6.31E-05	8.81E-05	7.36E-05	9.46E-05	3.40E-05	3.02E-05	4.18E-05	6.51E-05	8.59E-05	3.54E-05	3.79E-05	1.52E-05
B	120	0	0	0	0	0	0.000152394	9.04E-05	1.88E-05	1.74E-05	0.000129904	9.67E-05	0.000128583	0.00011809	0.000119004	5.56E-05	4.29E-05	3.80E-05	6.63E-05	7.92E-05	5.44E-05	7.45E-05	0.0001528
B	120	0	0	0	0	0	0.000146265	9.63E-05	3.27E-05	2.01E-05	0.000156323	9.33E-05	7.41E-05	0.000100609	0.000106322	7.09E-05	3.22E-05	6.01E-05	9.64E-05	8.48E-05	5.14E-05	8.09E-05	0.000213906
B	120	0	0	0	0	0	0.000125025	-7.00E-06	2.77E-05	3.14E-05	5.00E-05	7.82E-05	0.00010417	4.29E-05	7.26E-05	4.23E-05	3.04E-05	5.92E-05	6.82E-05	7.61E-05	7.00E-05	6.41E-05	0.000109111
B	120	0	0	0	0	0	0.000164037	4.89E-05	3.11E-05	3.28E-05	0.000104321	9.17E-05	0.000120018	9.99E-05	9.70E-05	8.92E-05	4.34E-05	6.18E-05	5.05E-05	7.39E-05	5.76E-05	2.26E-05	8.27E-05
B	120	0	0	0	0	0	0.000152281	5.72E-05	3.26E-05	2.44E-05	6.49E-06	4.79E-05	0.000126049	0.000102059	9.83E-05	3.52E-05	1.18E-05	2.72E-05	6.08E-05	4.79E-05	4.13E-05	6.01E-05	6.46E-05
B	120	0	0	0	0	0	0.000150965	9.48E-05	4.25E-05	4.84E-05	0.000133941	5.60E-05	0.000144977	0.000109862	0.000107568	4.43E-05	2.65E-05	6.19E-05	9.99E-05	8.10E-05	5.03E-05	7.19E-05	0.000197754
B	120	0	0	0	0	0	0.0001354	0.000103469	2.90E-05	6.81E-05	0.000106051	5.21E-05	0.000112892	9.01E-05	0.000106046	6.95E-05	1.49E-05	6.65E-05	6.84E-05	6.27E-05	5.36E-05	7.21E-05	0.000144447
B	120	0	0	0	0	0	0.000127088	0.00012559	1.35E-05	4.47E-05	5.64E-05	8.09E-05	9.55E-05	8.58E-05	0.000107751	6.76E-05	1.81E-05	4.90E-05	6.72E-05	5.68E-05	7.44E-05	5.36E-05	8.68E-05
B	120	0	0	0	0	0	0.000149253	0.000113869	2.82E-05	5.71E-05	5.96E-05	9.16E-05	8.99E-05	0.000108693	0.000100078	6.37E-05	5.02E-05	4.97E-05	9.84E-05	5.06E-05	5.24E-05	7.71E-05	0.000138595
TEXN	0	100	97	96	94	0	0.00404899	0.000997441	0.000911816	0.000745122	0.001311966	0.002185338	0.001954069	0.001858393	0.003903202	0.001285135	0.001706429	0.001749984	0.002813388	0.001373044	0.00206921	0.001532904	0.002931265
TEXN	0	100	97	96	94	0	0.003961557	0.001045007	0.000913179	0.000756543	0.001237095	0.00213056	0.00192864	0.001843178	0.003876435	0.001279009	0.001761904	0.001732258	0.002820149	0.001346135	0.002023273	0.001502035	0.002872922
TEXN	0	100	97	96	94	0	0.003968051	0.001184528	0.000929971	0.000845588	0.001319671	0.00212772	0.001964134	0.001885647	0.003902674	0.001301237	0.001774406	0.001750717	0.00281955	0.001400861	0.002009458	0.001534974	0.002833895
TEXN	0	100	97	96	94	0	0.003860924	0.001133142	0.000918451	0.000807154	0.001290808	0.002098866	0.001842149	0.00179111	0.003837964	0.001251338	0.001754669	0.001703396	0.002772805	0.001366938	0.001979672	0.001495806	0.002828179
TEXN	0	100	97	96	94	0	0.003885475	0.001074626	0.000900833	0.000757222	0.001255606	0.002072126	0.001887767	0.001786072	0.003830525	0.001254492	0.001697702	0.001736304	0.002792599	0.001360454	0.001996362	0.001480894	0.00277323
TEXN	0	100	97	96	94	0	0.003853765	0.001161715	0.000883176	0.000740498	0.001244816	0.002063552	0.001871044	0.001783802	0.003829588	0.001230455	0.00171271	0.001727023	0.002765308	0.001350202	0.001971602	0.001448602	0.002749089
TEXN	0	100	97	96	94	0	0.003851254	0.00109374	0.000895633	0.000759886	0.001208877	0.002080947	0.001844703	0.001746981	0.003817289	0.001221434	0.001742384	0.00171382	0.002769873	0.00134328	0.001976638	0.001433768	0.002857082
TEXN	0	100	97	96	94	0	0.003839571	0.001137493	0.000884396	0.000761328	0.001228765	0.002070974	0.001928637	0.001736576	0.003809075	0.001219866	0.001725522	0.001712429	0.002774501	0.001332803	0.002005755	0.001440351	0.002714549
TEXN	0	100	97	96	94	0	0.00388225	0.001055155	0.000884185	0.000766247	0.001208204	0.002096555	0.001866449	0.001785733	0.003814411	0.001204681	0.001721242	0.001708985	0.002765839	0.001377948	0.001993279	0.001511833	0.00283622
TEXN	0	100	97	96	94	0	0.003817113	0.001059371	0.000907937	0.000796058	0.001247426	0.002099041	0.00185698	0.001746729	0.003777585	0.001233525	0.001743501	0.00172679	0.002781786	0.001371875	0.001979678	0.001488886	0.002772151
TEXN	0	100	97	96	94	0	0.003859453	0.001053798	0.000886255	0.000768696	0.001305604	0.002081385	0.001866923	0.001745341	0.003770627	0.001201559	0.001741232	0.001719162	0.00276583	0.001308402	0.001986752	0.001471958	0.002808753
TEXN	0	100	97	96	94	0	0.003854375	0.001109907	0.000903736	0.000810819	0.001251368	0.002052131	0.001886712	0.001762886	0.003741642	0.00120961	0.001701179	0.001707254	0.002695375	0.001346089	0.001960488	0.001451756	0.002658141
BTX	98	98	0	94	0	0	0.001785319	0.000466038	0.000347181	0.000264395	0.000492173	0.000821309	0.000783761	0.000793742	0.001370586	0.000494012	0.000606648	0.00071106	0.001005911	0.000431025	0.000838743	0.000647345	0.001112503
BTX	98	98	0	94	0	0	0.001797365	0.000432627	0.000363865	0.000270286	0.000610155	0.000799483	0.000787411	0.000787023	0.001363859	0.000506753	0.000633267	0.00070375	0.001029469	0.00043757	0.000867208	0.000656974	0.000306225
BTX	98	98	0	94	0	0	0.001785997	0.000417708	0.000343729	0.00024562	0.000519659	0.000831525	0.000843663	0.000781736	0.001355583	0.000475319	0.000616882	0.000690525	0.001033359	0.000442752	0.000896134	0.000661116	0.001525675
BTX	98	98	0	94	0	0	0.001792062	0.000447765	0.000346119	0.000246461	0.000584337	0.000818927	0.00077709	0.000780835	0.001379261	0.000520858	0.000652392	0.000685282	0.001032409	0.00045149	0.000872037	0.000659998	0.001375235
BTX	98	98	0	94	0	0	0.001796984	0.000330748	0.000340614	0.000246053	0.000576575	0.00081885	0.000754946	0.00078057	0.001359577	0.000498046	0.000630723	0.000693616	0.001036672	0.000452933	0.000870674	0.000647009	0.001368635
BTX	98	98	0	94	0	0	0.001809963	0.00042413	0.000380433	0.000301789	0.000657171	0.000846829	0.000792749	0.00080914	0.001366023	0.00049049	0.000638681	0.000729538	0.001037218	0.000468728	0.000892014	0.000672618	0.001206793
BTX	98	98	0	94	0	0	0.001749542	0.000502135	0.000363437	0.000294492	0.000517009	0.00085183	0.000802563	0.000777381	0.001354699	0.000514036	0.000646321	0.000682754	0.001050053	0.000482654	0.000868883	0.000678633	0.001236206
BTX	98	98	0	94	0	0	0.001739707	0.000513999	0.000338788	0.000243953	0.000498453	0.000834424	0.000781731	0.00072419	0.001345422	0.000505058	0.000617094	0.000691413	0.001004546	0.000447973	0.000878447	0.000649064	0.001242163
BTX	98	98	0	94	0	0	0.001735088	0.000405427	0.000357735	0.000314085	0.000464127	0.000802432	0.000819324	0.000733824	0.001343509	0.000477911	0.000619334	0.000694962	0.001036531	0.000469851	0.000839117	0.000670845	0.001151214
BTX	98	98	0	94	0	0	0.001725293	0.000401437	0.00032952	0.000290301	0.000603842	0.000799688	0.000739959	0.000712553	0.001323667	0.000479424	0.000604212	0.000697351	0.001006354	0.000437605	0.000832535	0.000669562	0.001114078
BTX	98	98	0	94	0	0	0.001724331	0.000352137	0.0003454	0.000268582	0.000549955	0.000798862	0.000719053	0.000708828	0.001299251	0.0004668	0.000588649	0.000659141	0.001002397	0.000451932	0.000845701	0.000627399	0.001096196
BTX	98	98	0	94	0	0	0.00169492	0.000450683	0.000357374	0.000294486	0.000420531	0.000781743	0.000673285	0.000746333	0.001315004	0.000498129	0.000631913	0.000687068	0.000981937	0.000458663	0.000806707	0.000630299	0.000931046
MID	51	48	47	47	44	0	0.002590171	0.000678949	0.000538203	0.000448901	0.000661983	0.001309957	0.001174361	0.001188783	0.002391405	0.000777594	0.001064141	0.001032904	0.00170275	0.00080818	0.001303994	0.000937308	0.001653788
MID	51	48	47	47	44	0	0.002549466	0.000650942	0.00053401	0.000455619	0.000692309	0.001315215	0.001205375	0.001156817	0.002352843	0.000778804	0.001003942	0.001034301	0.001685926	0.000773759	0.001270751	0.0009613	0.001675525
MID	51	48	47	47	44	0	0.002585804	0.00076029	0.000544004	0.000466353	0.000731136	0.001327569	0.001207056	0.001191715	0.002383969	0.000785887	0.001025426	0.001057205	0.001698993	0.000782155	0.001307205	0.000974079	0.001706411
MID	51	48	47	47	44	0	0.002508627	0.000672576	0.000521811	0.000444427	0.000721587	0.00129655	0.001176551	0.001144576	0.002349514	0.000766461	0.000981356	0.001034589	0.001701424	0.000773347	0.001273125	0.000947046	0.001665244
MID	51	48	47	47	44	0	0.002504125	0.000735969	0.000541172	0.000474289	0.000810374	0.00128383	0.001246679	0.001141395	0.002351517	0.000759725	0.001008936	0.00101538	0.001678366	0.00076911	0.001273099	0.000914819	0.001730785
MID	51	48	47	47	44	0	0.002498381	0.000703958	0.00052964	0.000407782	0.000819775	0.001295361	0.001165899	0.001148843	0.002352761	0.000787184	0.001001101	0.001025696	0.001680518	0.000778009	0.001276606	0.000927831	0.001649057
MID	51	48	47	47	44	0	0.002510475	0.000583413	0.000535486	0.000450459	0.000881538	0.001308889	0.001162717	0.001132968	0.002337549	0.000784269	0.001020174	0.001039234	0.001722959	0.000759796	0.001277548	0.000929086	0.001599939
MID	51	48	47	47	44	0	0.002510397	0.000651385	0.000535027	0.00046334	0.000741781	0.001306391	0.001177907	0.001134222	0.0023572	0.000785622	0.001011698	0.001047238	0.001680612	0.000786037	0.001298523	0.000956468	0.00175929
MID	51	48	47	47	44	0	0.00251066	0.000652278	0.000539898	0.000490909	0.000945996	0.001348156	0.001183929	0.001107184	0.002338826	0.00079348	0.001031038	0.001066932	0.001696922	0.000798561	0.001286809	0.000961708	0.001686254
MID	51	48	47	47	44	0	0.002481219	0.000726048	0.000524705	0.000458898	0.000835958	0.001321683	0.001228326	0.001095529	0.002342957	0.00079237	0.000992437	0.001015447	0.001667174	0.000783195	0.001290435	0.000948685	0.001716455
MID	51	48	47	47	44	0	0.002458043	0.000718282	0.000525801	0.000527199	0.000785296	0.001254727	0.001186297	0.001107404	0.002300593	0.000766965	0.000981354	0.000973798	0.0016443	0.00076911	0.001252141	0.000908011	0.001606266
MID	51	48	47	47	44	0	0.002480567	0.000732141	0.000525728	0.000461283	0.000740259	0.001281392	0.00121212	0.00112289	0.002320708	0.000770932	0.00098152	0.001007947	0.001652079	0.000772836	0.001254203	0.000920416	0.001635575
EX	0	0	77	78	0	0	0.002386675	0.00056801	0.000456164	0.000332159	0.000674854	0.00103874	0.000911014	0.000940933	0.001922362	0.000610787	0.000815104	0.000898009	0.001484514	0.000570306	0.001130417	0.000834621	0.0013992
EX	0	0	77	78	0	0	0.002406849	0.000572557	0.000435619	0.000329577	0.000628511	0.001071799	0.001024265	0.001040883	0.001891906	0.000664553	0.000780716	0.000891726	0.00147665	0.00057756	0.00111326	0.000821085	0.001447852
EX	0	0	77	78	0	0	0.002340391	0.000525117	0.000472703	0.000366329	0.000627354	0.0010367	0.000973802	0.000978498	0.001908146	0.000675168	0.000824575	0.000898376	0.001537926	0.000615393	0.001105889	0.000812543	0.001376083
EX	0	0	77	78	0	0	0.002360286	0.000432315	0.000451418	0.00036433	0.000612961	0.000997296	0.000918055	0.000963184	0.001880939	0.00064955	0.000833724	0.000885294	0.001499008	0.000611239	0.001107639	0.000815701	0.001361903
EX	0	0	77	78	0	0	0.002387209	0.000459329	0.000439604	0.000369822	0.00058481	0.001049303	0.00100128	0.000986061	0.001920666	0.000664022	0.000791502	0.000886168	0.001487631	0.000572313	0.001091801	0.000847856	0.001403832
EX	0	0	77	78	0	0	0.002292077	0.000524811	0.000427389	0.000344888	0.00069262	0.000968626	0.000987712	0.000928133	0.00184286	0.00061671	0.000760084	0.00086582	0.001454966	0.000557267	0.001069152	0.000763858	0.001400493
EX	0	0	77	78	0	0	0.002308017	0.000459675	0.000456796	0.000374424	0.00061489	0.000977994	0.000925281	0.00095189	0.001862134	0.000620365	0.000807919	0.000866873	0.001465852	0.000582122	0.001076788	0.000815332	0.001243738
EX	0	0	77	78	0	0	0.002318053	0.000550853	0.000469776	0.00039382	0.000561537	0.001004893	0.001000102	0.000955673	0.001860692	0.000638406	0.00083262	0.000890178	0.001517324	0.000590214	0.001069758	0.000811369	0.001406059
EX	0	0	77	78	0	0	0.002383967	0.0005302	0.00043339	0.00032459	0.000690627	0.001070478	0.001039039	0.00099435	0.00194128	0.0006386	0.000793856	0.000868394	0.001473488	0.000522311	0.001167379	0.000883421	0.001520265
EX	0	0	77	78	0	0	0.002281345	0.000517301	0.000449357	0.000347105	0.000725325	0.000973234	0.000942558	0.000913327	0.001826392	0.000603233	0.000765152	0.000851188	0.001432029	0.000579887	0.001104654	0.000797932	0.001287485
EX	0	0	77	78	0	0	0.002308803	0.000552152	0.000463459	0.000399308	0.00072797	0.001002531	0.001041027	0.001013165	0.001862324	0.000648942	0.000788332	0.000860031	0.001468343	0.000576611	0.001095535	0.000822214	0.001397708
EX	0	0	77	78	0	0	0.002213439	0.00053332	0.000415275	0.000377806	0.000658219	0.000971235	0.000959126	0.000935576	0.001822501	0.000612364	0.000750848	0.000849303	0.001393674	0.00056965	0.001033945	0.000787561	0.001095261
BEX	110	0	100	100	0	0	0.002486118	0.000672877	0.000474795	0.000395469	0.00071909	0.001109387	0.001066062	0.00105369	0.00205805	0.000680654	0.000859317	0.000907619	0.001583605	0.000607462	0.001162725	0.000871697	0.001625201
BEX	110	0	100	100	0	0	0.002434398	0.000614904	0.000508046	0.00042495	0.000717007	0.001114466	0.001030221	0.001042098	0.002040583	0.000666776	0.000907055	0.000931706	0.001598464	0.000635592	0.001162819	0.000878895	0.001510905
BEX	110	0	100	100	0	0	0.002449628	0.000583895	0.000491922	0.000410635	0.000704291	0.001114803	0.001107622	0.001005782	0.002033189	0.000686139	0.000901071	0.000938933	0.001615316	0.000624447	0.001200416	0.000886496	0.00158105
BEX	110	0	100	100	0	0	0.002423583	0.000644075	0.000493264	0.000413785	0.000782459	0.001118004	0.001012337	0.001029753	0.002038306	0.000693667	0.00091441	0.000940117	0.001603727	0.00064918	0.001180318	0.000868766	0.001549125
BEX	110	0	100	100	0	0	0.002388668	0.000560618	0.000506538	0.00042778	0.000687961	0.001110763	0.001051284	0.000995636	0.0020115	0.000658838	0.000866827	0.000934188	0.001603964	0.000628556	0.001168626	0.000879751	0.001514906
BEX	110	0	100	100	0	0	0.002428348	0.000576023	0.000503486	0.00042822	0.000779266	0.001132208	0.00105093	0.001021748	0.00201434	0.000662906	0.000872369	0.000949381	0.001585316	0.000626568	0.001180811	0.000913219	0.001622023
BEX	110	0	100	100	0	0	0.002358713	0.000511277	0.000463169	0.000375269	0.000799234	0.00107579	0.000978868	0.001020878	0.001957244	0.000648796	0.000836247	0.000873003	0.00152584	0.000603255	0.00113833	0.000865378	0.001329347
BEX	110	0	100	100	0	0	0.002333874	0.000540972	0.000472102	0.000415229	0.000714021	0.001094114	0.000941747	0.000974351	0.001953716	0.000648065	0.000843163	0.000881304	0.001520558	0.00061617	0.001157454	0.000875261	0.001481192
BEX	110	0	100	100	0	0	0.002297805	0.000613355	0.000459415	0.000367274	0.000795266	0.001074432	0.001000806	0.000958221	0.00193087	0.000638753	0.000794769	0.000870005	0.001492794	0.000618055	0.001134946	0.00084282	0.001490143
BEX	110	0	100	100	0	0	0.002337784	0.000606883	0.000481438	0.000416156	0.000634445	0.001064585	0.00100693	0.000967501	0.001947942	0.00062917	0.000816268	0.000870837	0.001493188	0.000654283	0.001162932	0.000877688	0.001536829
BEX	110	0	100	100	0	0	0.0023253	0.000542232	0.000484757	0.000425374	0.000808763	0.001034138	0.000985302	0.000969018	0.0019084	0.000623899	0.000788931	0.000857297	0.001464608	0.000626713	0.001130616	0.000829442	0.001484641
BEX	110	0	100	100	0	0	0.002296076	0.000660389	0.000471309	0.000394234	0.000661291	0.000969998	0.001029992	0.000970548	0.001924559	0.000821601	0.000793767	0.000845275	0.001482768	0.000610196	0.00102099	0.000740895	0.001190671
BT	91	87	0	0	0	0	0.000553193	0.000111648	0.00014115	0.000115837	0.000245234	0.000304509	0.000274993	0.000184163	0.000456476	0.00017078	0.000171506	0.000195151	0.000329163	0.000154204	0.000282471	0.000237391	0.000397284
BT	91	87	0	0	0	0	0.000575976	0.000239887	0.000101325	4.39E-05	0.000226731	0.000320865	0.000311419	0.000265586	0.000461005	0.000179799	0.00018097	0.000193245	0.000332675	0.000149629	0.000295555	0.000222941	0.000471686
BT	91	87	0	0	0	0	0.000595192	0.000197021	0.000121817	6.88E-05	0.000259642	0.00027958	0.000350556	0.000281502	0.000453753	0.000190944	0.000212038	0.000169849	0.000331614	0.000167888	0.000313856	0.000253326	0.00036897
BT	91	87	0	0	0	0	0.000555344	0.000161543	0.000122795	8.83E-05	0.000236006	0.000259702	0.00025467	0.000240756	0.000462367	0.000167049	0.00020135	0.000194581	0.000332216	0.000164569	0.000296536	0.000236939	0.000332403
BT	91	87	0	0	0	0	0.000591945	0.000221945	0.000125772	0.000106521	0.000187006	0.000289722	0.000177858	0.000291486	0.000475919	0.000168208	0.00024679	0.000192001	0.000343287	0.000169269	0.000293076	0.000225886	0.000355558
BT	91	87	0	0	0	0	0.000608869	0.00023027	0.000120529	0.000130181	0.000161287	0.000266184	0.000227731	0.000297709	0.000458449	0.00015754	0.000219075	0.000200843	0.000352993	0.000180901	0.000277675	0.000207279	0.000288277
BT	91	87	0	0	0	0	0.000554508	0.000150882	0.000108593	8.90E-05	0.00024678	0.000261632	0.000158877	0.000240557	0.000427734	0.000142621	0.000169871	0.000186879	0.000327663	0.000140292	0.000285978	0.000234561	0.000293709
BT	91	87	0	0	0	0	0.000561306	0.000157136	0.000143274	0.000125022	0.000246499	0.000305917	0.000260362	0.000207901	0.000472688	0.000169958	0.000176092	0.000233117	0.000345109	0.000136515	0.000325752	0.000262449	0.000309404
BT	91	87	0	0	0	0	0.000562049	0.000191447	0.000129414	7.25E-05	0.000169533	0.000270987	0.000192959	0.000242486	0.000465157	0.000170055	0.000177707	0.000207783	0.000334221	0.000167318	0.000301873	0.000239704	0.000471033
BT	91	87	0	0	0	0	0.000574456	0.000138144	0.000131888	0.000110114	0.000295888	0.000298586	0.000214202	0.000228053	0.000423491	0.000137535	0.000201648	0.0002126	0.000349814	0.000211621	0.000268105	0.000243801	0.000476085
BT	91	87	0	0	0	0	0.000557957	0.000143412	9.76E-05	0.000104766	0.000303776	0.000294685	0.000237789	0.000218992	0.000438582	0.000155832	0.000194026	0.000199846	0.00030166	0.00016745	0.000307674	0.000241115	0.000398895
BT	91	87	0	0	0	0	0.000535369	0.000123376	0.000110052	9.25E-05	0.000299454	0.00028517	0.000161781	0.000203605	0.000407711	0.000130163	0.000206173	0.000176418	0.000317536	0.000200079	0.000283708	0.000247305	0.000321203
BTE	91	88	84	0	0	0	0.001825188	0.00048668	0.000348656	0.000306792	0.00050933	0.000792023	0.000704462	0.000782351	0.00154263	0.000477226	0.00057709	0.000601193	0.001137948	0.000457138	0.000883892	0.000650585	0.001116071
BTE	91	88	84	0	0	0	0.001776498	0.000431525	0.00032394	0.00028438	0.00052522	0.000808421	0.000691421	0.000738308	0.00150873	0.000436766	0.000536186	0.000601229	0.001082774	0.000463155	0.000899734	0.000659574	0.001180495
BTE	91	88	84	0	0	0	0.001795619	0.000419116	0.000344625	0.000253409	0.000579531	0.000806895	0.000769592	0.000732094	0.001534861	0.000476262	0.000577864	0.000593657	0.001128203	0.000489344	0.000879269	0.000680399	0.001186037
BTE	91	88	84	0	0	0	0.001780462	0.000422515	0.000339479	0.000289409	0.00056303	0.000816864	0.000728876	0.000714773	0.001535736	0.000497145	0.000566917	0.000580801	0.001110384	0.000501901	0.000879793	0.000694326	0.001161879
BTE	91	88	84	0	0	0	0.001790742	0.00049696	0.000352021	0.00033087	0.000605606	0.000821981	0.000695707	0.000739475	0.001529188	0.00044336	0.000583317	0.000585486	0.001117783	0.000529097	0.000870773	0.000691956	0.001216828
BTE	91	88	84	0	0	0	0.001813024	0.000494436	0.000356636	0.000300633	0.000624004	0.000805664	0.000791739	0.000770424	0.001554897	0.000478246	0.000552281	0.000589289	0.001119568	0.000502918	0.000865456	0.00066153	0.001214818
BTE	91	88	84	0	0	0	0.001825616	0.000500383	0.000350837	0.000262473	0.000663194	0.000822561	0.000821125	0.000746458	0.001553547	0.00049509	0.00056562	0.000591182	0.001112269	0.000488458	0.000888011	0.000686274	0.001171399
BTE	91	88	84	0	0	0	0.001790679	0.000409878	0.000345786	0.000275158	0.000575278	0.000803626	0.000715413	0.000721694	0.00154127	0.000493209	0.000588825	0.000600484	0.001137308	0.000483768	0.000893424	0.000666784	0.001097002
BTE	91	88	84	0	0	0	0.001768726	0.000461238	0.000367983	0.000266329	0.000612377	0.000824721	0.00067165	0.000730414	0.001521208	0.000468979	0.000571251	0.000596675	0.001131889	0.00050867	0.000857692	0.000657804	0.001144507
BTE	91	88	84	0	0	0	0.001774819	0.000431047	0.000352081	0.000302067	0.000598279	0.000822701	0.000717775	0.000723218	0.001513451	0.000479087	0.000563102	0.000585852	0.001118786	0.000470381	0.000861543	0.000649824	0.00113557
BTE	91	88	84	0	0	0	0.001798177	0.000478139	0.000346661	0.00028589	0.000622043	0.000804184	0.000712007	0.000764863	0.001530597	0.000493303	0.000526784	0.000615982	0.001098337	0.000477447	0.000887069	0.000674335	0.001166645
BTE	91	88	84	0	0	0	0.001766217	0.000452569	0.000352575	0.000326335	0.000601141	0.000779694	0.000717626	0.000757758	0.00148717	0.000482804	0.000558631	0.000604354	0.001112242	0.000493847	0.000847554	0.000661912	0.001163517
BEXN	89	0	82	79	100	0	0.003764302	0.00094062	0.000764866	0.000692798	0.001295471	0.002182606	0.001841149	0.001619846	0.003629273	0.001148301	0.001333958	0.001496895	0.002725737	0.001203609	0.002028617	0.00151075	0.002922999
BEXN	89	0	82	79	100	0	0.003622507	0.000944162	0.000778906	0.000725043	0.001027222	0.002058626	0.001645802	0.001635552	0.003519807	0.00107469	0.001323055	0.001488455	0.002728075	0.001228817	0.001964588	0.001433676	0.002864747
BEXN	89	0	82	79	100	0	0.003661206	0.000967518	0.000784321	0.000718137	0.001403152	0.002134676	0.001774466	0.001657277	0.003527675	0.001154603	0.001317449	0.00153565	0.002751447	0.00125747	0.002046061	0.001493946	0.002886999
BEXN	89	0	82	79	100	0	0.003761332	0.000946435	0.000785309	0.000728882	0.001125909	0.002154677	0.001784052	0.001661359	0.003647248	0.00118461	0.001321625	0.001543989	0.002770083	0.001265771	0.002027603	0.001470602	0.002793428
BEXN	89	0	82	79	100	0	0.003882949	0.000968075	0.000781471	0.000702291	0.001168794	0.002147257	0.001788172	0.001741298	0.003751594	0.001201277	0.001329023	0.001519002	0.002740254	0.001214645	0.002014591	0.001481096	0.002796598
BEXN	89	0	82	79	100	0	0.003960122	0.001014709	0.000778257	0.000761539	0.00115387	0.002183145	0.001834913	0.001740608	0.003856672	0.00121128	0.001294034	0.00150025	0.002772903	0.001229691	0.002044967	0.001491518	0.002804302
BEXN	89	0	82	79	100	0	0.004006597	0.00114029	0.000757915	0.000727477	0.00133905	0.002163628	0.001890645	0.001793209	0.003892587	0.001211561	0.001312751	0.001504237	0.002744465	0.001235748	0.002005793	0.001476914	0.002709587
BEXN	89	0	82	79	100	0	0.003998068	0.00118905	0.000782456	0.000776058	0.001330617	0.002153546	0.001874995	0.001778014	0.003925625	0.00123087	0.001301879	0.001511907	0.002761884	0.001231101	0.002050807	0.001491217	0.003109521
BEXN	89	0	82	79	100	0	0.004048315	0.001163258	0.000773943	0.000684643	0.001301801	0.002173028	0.001929231	0.00179959	0.003928841	0.001226086	0.001290912	0.001509797	0.002767698	0.00122884	0.002034741	0.00148449	0.002948337
BEXN	89	0	82	79	100	0	0.004008714	0.001079052	0.000764607	0.000690008	0.001313364	0.002119029	0.001939286	0.001792348	0.003891886	0.001204792	0.00127787	0.001492834	0.002761256	0.001228741	0.002026794	0.00147528	0.002891262
BEXN	89	0	82	79	100	0	0.00395924	0.001047664	0.000781601	0.000738665	0.001408631	0.002160807	0.001902279	0.001786737	0.003861448	0.001207819	0.001246436	0.001481647	0.002778996	0.001230523	0.002027852	0.00147728	0.002840977
BEXN	89	0	82	79	100	0	0.003854534	0.000976552	0.000760513	0.000701913	0.001304764	0.002102939	0.001809141	0.001713173	0.003750514	0.001153416	0.00128511	0.00147029	0.002696114	0.001199691	0.001983359	0.001453159	0.002754744
BTXN	90	87	0	79	100	0	0.003351584	0.000957473	0.000598917	0.000563532	0.001089868	0.001889481	0.001616267	0.001522197	0.003166375	0.000315525	0.000966845	0.001294906	0.002314691	0.001065032	0.00175549	0.001279186	0.002481601
BTXN	90	87	0	79	100	0	0.003328801	0.000891513	0.000631415	0.000629374	0.001185433	0.001928523	0.001568342	0.001468572	0.003111797	0.000379487	0.001024115	0.001325904	0.002348969	0.001065664	0.001788237	0.001325912	0.002472501
BTXN	90	87	0	79	100	0	0.003415183	0.000970971	0.000631156	0.000610328	0.001358036	0.001963306	0.00170261	0.00150906	0.003236299	0.000391303	0.000990833	0.001319521	0.002363232	0.001029577	0.001763654	0.001306707	0.002497758
BTXN	90	87	0	79	100	0	0.003434153	0.000895026	0.000609831	0.000575977	0.001181664	0.001956836	0.001700968	0.001546595	0.003274054	0.000405035	0.000994149	0.001293109	0.002321416	0.001043601	0.001765272	0.001291619	0.002421247
BTXN	90	87	0	79	100	0	0.003475074	0.000895279	0.000590878	0.000588716	0.00117887	0.001908818	0.001647575	0.001559472	0.003276933	0.000480043	0.000980687	0.001299279	0.00231338	0.001057359	0.001769502	0.001300666	0.002481464
BTXN	90	87	0	79	100	0	0.003491696	0.000902318	0.00062947	0.000627139	0.001313341	0.001906305	0.001705828	0.001591056	0.003278495	0.000469308	0.000976475	0.001291516	0.002317703	0.001056624	0.001777425	0.001285767	0.002458054
BTXN	90	87	0	79	100	0	0.003465958	0.000925158	0.000646546	0.000604136	0.001272414	0.001931908	0.001738058	0.001615407	0.003273081	0.000508287	0.001009872	0.001289759	0.002330738	0.001051748	0.001794834	0.00131573	0.002462381
BTXN	90	87	0	79	100	0	0.003488182	0.00098606	0.000613686	0.000650392	0.001081753	0.001900576	0.001694262	0.001602136	0.00328258	0.000565377	0.000967573	0.001258292	0.002308726	0.001044854	0.001735143	0.001278563	0.002437095
BTXN	90	87	0	79	100	0	0.003459893	0.000922371	0.000620764	0.000602007	0.001126322	0.001856936	0.001675002	0.001576887	0.003233616	0.00057947	0.000967584	0.001292461	0.0022916	0.001024809	0.001734817	0.001278374	0.002402688
BTXN	90	87	0	79	100	0	0.003438794	0.000901985	0.000600689	0.000609877	0.001136306	0.001903527	0.001652468	0.001578667	0.003267454	0.000652105	0.000942323	0.00129112	0.002306679	0.001029303	0.001753281	0.001291926	0.00237775
BTXN	90	87	0	79	100	0	0.003375053	0.00093396	0.000617848	0.000642104	0.001135053	0.001832468	0.001550285	0.001509521	0.003175364	0.000645722	0.000975557	0.001276613	0.002292363	0.001059482	0.001679753	0.00123486	0.002365836
BTXN	90	87	0	79	100	0	0.003312256	0.000927252	0.000622134	0.000688574	0.001241431	0.001790069	0.001551756	0.001519947	0.003141346	0.000665694	0.000963337	0.001241481	0.002262558	0.001085737	0.001645603	0.001195256	0.002344577
BN	110	0	0	0	80	0	0.002249848	0.000621485	0.00017877	0.000439945	0.000431566	0.001040418	0.000649243	0.000293616	0.002495337	0.000343567	0.000333511	0.000460351	0.001540387	0.000605348	0.000682867	0.000712826	0.00177921
BN	110	0	0	0	80	0	0.002188727	0.000573247	0.000191703	0.000402908	0.000507327	0.001037393	0.000614993	0.000263644	0.002438288	0.000361326	0.000344199	0.000465477	0.001512221	0.000635781	0.000687029	0.000672873	0.001294809
BN	110	0	0	0	80	0	0.002123933	0.000605312	0.00018892	0.000383732	0.000594156	0.001053462	0.000608339	0.000235615	0.002523592	0.000296559	0.000308536	0.000440878	0.001510858	0.000589985	0.000725472	0.000649008	0.001297727
BN	110	0	0	0	80	0	0.002148785	0.00059533	0.000171761	0.000415851	0.000587733	0.001022752	0.00068547	0.000223787	0.002464561	0.000303268	0.000276869	0.000453855	0.001519298	0.000600067	0.000702756	0.000648151	0.001222385
BN	110	0	0	0	80	0	0.002157878	0.000658013	0.000186631	0.000388733	0.000524475	0.001060075	0.000622931	0.000282595	0.002516748	0.000334194	0.000312872	0.000416958	0.001512819	0.000595789	0.000727954	0.000655434	0.001182764
BN	110	0	0	0	80	0	0.002136556	0.000663104	0.000194777	0.000404523	0.000526969	0.001049813	0.000588716	0.0002655	0.002486911	0.000329348	0.000299744	0.000418967	0.001540616	0.000621228	0.000734077	0.000652469	0.001152344
BN	110	0	0	0	80	0	0.002086003	0.000621245	0.000191699	0.000421936	0.000565704	0.001072678	0.000646079	0.000251603	0.002499875	0.000340057	0.00031427	0.000442354	0.001545122	0.000635002	0.000711541	0.000666101	0.001175062
BN	110	0	0	0	80	0	0.002123694	0.000579495	0.000205863	0.000406854	0.000481139	0.001028919	0.000697868	0.000250298	0.002485871	0.000335765	0.000307385	0.000426687	0.001548705	0.000627369	0.000726568	0.000661602	0.001244188
BN	110	0	0	0	80	0	0.002177667	0.000575399	0.000176363	0.000410689	0.000653086	0.00105525	0.000745132	0.000296149	0.002340324	0.000322786	0.000314682	0.00045237	0.001546293	0.000601451	0.00072502	0.000691987	0.001467887
BN	110	0	0	0	80	0	0.002145465	0.000497832	0.000178005	0.000398967	0.000543374	0.00104719	0.000661558	0.000183679	0.002312384	0.000303303	0.000283408	0.000416065	0.001538675	0.000578476	0.000706372	0.000678963	0.001393159
BN	110	0	0	0	80	0	0.002169357	0.000493555	0.000190445	0.000424111	0.000576045	0.00105471	0.000627086	0.000248947	0.002336153	0.000330432	0.000273365	0.000393921	0.001550061	0.00062169	0.000708819	0.000666881	0.001320557
BN	110	0	0	0	80	0	0.002193449	0.000568393	0.000189573	0.000406814	0.000542155	0.001032903	0.000705749	0.000266143	0.002470813	0.000302884	0.000296621	0.000458586	0.001534895	0.000634422	0.000717926	0.00068507	0.00128645
BE	100	0	91	0	0	0	0.001104959	0.000298892	0.000114482	0.00010541	0.00029881	0.000464094	0.000352467	0.000128707	0.0012214	0.000152389	0.000147618	0.000232308	0.000735904	0.000230161	0.000394282	0.000391134	0.000718093
BE	100	0	91	0	0	0	0.001153975	0.000312837	0.000102227	0.000146231	0.000331262	0.000480715	0.000311476	0.000150256	0.00120237	0.000155835	0.000153769	0.000241075	0.000748137	0.000237468	0.000398682	0.000407979	0.000723891
BE	100	0	91	0	0	0	0.00117028	0.000305139	0.000126568	0.000165164	0.000412422	0.000495794	0.000316249	0.00018571	0.001156538	0.000182074	0.000172426	0.000270086	0.000764598	0.000245438	0.000414049	0.000410175	0.000763018
BE	100	0	91	0	0	0	0.001120603	0.00030369	0.000111092	0.000186354	0.000237946	0.000459276	0.000334327	0.00016959	0.001147407	0.000163335	0.000168037	0.000235446	0.000777552	0.000236555	0.000417811	0.000405442	0.00069972
BE	100	0	91	0	0	0	0.001146943	0.000349234	0.00010379	0.000134402	0.000355325	0.000490643	0.000394887	0.000158765	0.001222904	0.000169808	0.000158171	0.000235571	0.000753984	0.000245462	0.000389946	0.000394214	0.000712459
BE	100	0	91	0	0	0	0.001115701	0.000468365	0.000100069	0.00014115	0.000267337	0.000475471	0.000320386	0.00018554	0.001242993	0.000159797	0.000149972	0.000235442	0.000754094	0.000227721	0.000398789	0.000402673	0.000865537
BE	100	0	91	0	0	0	0.001127442	0.000319679	0.000121696	0.00013993	0.000317978	0.000486185	0.000325428	0.000128789	0.001173553	0.000170793	0.000153599	0.000230144	0.000755447	0.000277101	0.000396638	0.000400438	0.00076883
BE	100	0	91	0	0	0	0.001119167	0.000421799	0.000107592	0.000113749	0.000250018	0.000483543	0.000251709	0.000118192	0.00131525	0.000153934	0.000148978	0.000234601	0.000738267	0.000255159	0.000407946	0.000394611	0.000701352
BE	100	0	91	0	0	0	0.00110022	0.00036763	0.000104631	0.000139575	0.00030804	0.000488342	0.00032457	0.000172697	0.001226834	0.000145028	0.000142901	0.000225297	0.000753325	0.000241941	0.000406057	0.000399547	0.000696366
BE	100	0	91	0	0	0	0.001171538	0.000395081	0.000124182	0.000171413	0.000299532	0.000459484	0.000320419	0.000233429	0.001222375	0.000187255	0.000186238	0.000234775	0.000759182	0.000260855	0.000433704	0.000410316	0.000641995
BE	100	0	91	0	0	0	0.001154058	0.000467688	0.000116239	0.000181488	0.000273541	0.000499004	0.00032708	0.000196988	0.001255958	0.000185541	0.000154248	0.000214326	0.000771213	0.000271835	0.000408588	0.000404095	0.000694407
BE	100	0	91	0	0	0	0.001145666	0.000374398	0.000121179	0.00015955	0.000419067	0.000481474	0.000311716	0.000233467	0.001194375	0.000160554	0.000165702	0.00023084	0.000752423	0.000248856	0.00040459	0.000391239	0.00066641
E	0	0	67	0	0	0	0.001169751	0.000250808	0.000158897	0.000149056	0.000212155	0.000473778	0.000445979	0.000469415	0.00101641	0.000254594	0.000214952	0.000385495	0.000739475	0.000253194	0.000503719	0.000407694	0.000615512
E	0	0	67	0	0	0	0.001149124	0.000288133	0.000151664	0.000129352	0.00021028	0.000483209	0.000459998	0.000449296	0.000981479	0.000219349	0.000181877	0.000359232	0.00069911	0.000219539	0.000495309	0.000388944	0.000675244
E	0	0	67	0	0	0	0.001142481	0.000197592	0.000137932	0.000117271	0.000273576	0.00046599	0.00044747	0.000473392	0.000959479	0.000180662	0.000141965	0.000313649	0.000657676	0.00021677	0.000495946	0.00036984	0.000656079
E	0	0	67	0	0	0	0.001101348	8.82E-05	0.000161981	0.000160182	0.00048378	0.000496184	0.000462223	0.000424543	0.000934451	0.000197639	0.000151305	0.000343909	0.000694894	0.00023743	0.000497126	0.000386268	0.000555011
E	0	0	67	0	0	0	0.001109755	0.000220135	0.000143468	0.000136833	0.000326646	0.000495475	0.000444713	0.000427526	0.000935247	0.000206937	0.000201765	0.000341741	0.000654504	0.000237029	0.000483279	0.00036779	0.000582527
E	0	0	67	0	0	0	0.001178802	0.00023429	0.000126	0.000126497	0.00032925	0.000440855	0.000414526	0.000485239	0.000966324	0.000224038	0.000193873	0.000327489	0.000691982	0.000223836	0.000495076	0.000375968	0.000519762
E	0	0	67	0	0	0	0.001131666	0.000194203	0.000149062	0.000135337	0.000335252	0.000477689	0.000431188	0.000441401	0.000974091	0.000227737	0.000179334	0.000317839	0.000682481	0.000237861	0.000468265	0.000379516	0.000612745
E	0	0	67	0	0	0	0.001120604	0.000154669	0.000146212	8.69E-05	0.000364741	0.000457791	0.000433549	0.000451107	0.000946166	0.000222804	0.000159393	0.000334744	0.00066982	0.000227316	0.00047095	0.000379358	0.000532299
E	0	0	67	0	0	0	0.001143092	0.000298745	0.000153805	0.000127429	0.000380799	0.00046099	0.000433297	0.00047799	0.000965624	0.000249613	0.00018715	0.000351623	0.000694404	0.000247025	0.000462778	0.000397463	0.000556599
E	0	0	67	0	0	0	0.001116591	0.000314939	0.000155423	0.000165534	0.000296872	0.000444779	0.000488003	0.000417832	0.000954907	0.000256784	0.000210705	0.00034699	0.000693212	0.000224473	0.000469579	0.000386568	0.000536483
E	0	0	67	0	0	0	0.00111181	0.00029276	0.000156028	0.000154344	0.000227942	0.000454781	0.000411775	0.000453615	0.000957613	0.000244689	0.000203103	0.000351029	0.000668036	0.000246366	0.000445895	0.000378823	0.000545097
E	0	0	67	0	0	0	0.001107043	0.000312345	0.000142349	0.00013215	0.000253925	0.000448417	0.000417092	0.000460449	0.000961103	0.000250736	0.000211816	0.000348671	0.000678919	0.000255132	0.000474012	0.000390712	0.000598981
TEX	0	83	76	75	0	0	0.002433215	0.00056439	0.000383874	0.000337892	0.000733525	0.001077881	0.00098965	0.001022183	0.002122756	0.000543543	0.000497804	0.000852733	0.001598948	0.000617488	0.001123741	0.000886858	0.001698636
TEX	0	83	76	75	0	0	0.00239158	0.000534928	0.000384078	0.000368978	0.000811698	0.001110187	0.000971655	0.001031032	0.002097045	0.000524165	0.000498047	0.000818605	0.001557349	0.000634865	0.001086128	0.000890604	0.00161305
TEX	0	83	76	75	0	0	0.002386655	0.000598358	0.00036817	0.000350855	0.000664986	0.001093647	0.000973396	0.001049411	0.002126244	0.000533808	0.000513606	0.000845177	0.001566998	0.000615392	0.001097708	0.000870573	0.001464537
TEX	0	83	76	75	0	0	0.002382582	0.000628412	0.000382038	0.000323849	0.000657749	0.001060907	0.001022772	0.001058729	0.00207936	0.000523218	0.000505885	0.000817404	0.001550891	0.00059872	0.001081379	0.000872031	0.001611035
TEX	0	83	76	75	0	0	0.002365351	0.000644551	0.000381142	0.000340578	0.000680076	0.001106715	0.000974837	0.001073083	0.002085977	0.000530238	0.000515767	0.000820901	0.001541413	0.000647157	0.001118247	0.000857373	0.001505608
TEX	0	83	76	75	0	0	0.002332061	0.000601841	0.000378365	0.000322371	0.000791468	0.001073443	0.000978227	0.00099333	0.002076095	0.000532682	0.000499418	0.000855516	0.001550005	0.000613788	0.001079364	0.000877712	0.001452789
TEX	0	83	76	75	0	0	0.002356968	0.000654457	0.000389434	0.000314359	0.000800734	0.001073009	0.000946021	0.000992828	0.002077993	0.000502225	0.00047759	0.000828973	0.001569709	0.00060285	0.001073449	0.000854263	0.001484883
TEX	0	83	76	75	0	0	0.002324604	0.000568045	0.000363734	0.000300411	0.000741366	0.001088594	0.000968717	0.000997342	0.002062321	0.000517168	0.000465546	0.000834338	0.001538419	0.000599752	0.001080383	0.000878913	0.001605596
TEX	0	83	76	75	0	0	0.002349311	0.00058336	0.000386833	0.000324038	0.000727263	0.001076181	0.000946911	0.001010548	0.002060803	0.000518661	0.000495576	0.000841615	0.001543104	0.00062281	0.001069014	0.00087386	0.001585365
TEX	0	83	76	75	0	0	0.002349074	0.000575938	0.000377289	0.000277948	0.000740029	0.001074177	0.000983518	0.001010943	0.00206266	0.000530646	0.000479728	0.000838814	0.001539639	0.000633122	0.0010729	0.000852465	0.001603149
TEX	0	83	76	75	0	0	0.002338115	0.000593293	0.000372258	0.000332071	0.000820963	0.001048012	0.00089649	0.000987455	0.002048007	0.000512197	0.000451001	0.00079476	0.001532784	0.000592724	0.001061889	0.000837073	0.001511789
TEX	0	83	76	75	0	0	0.002320669	0.000565431	0.000385897	0.000338578	0.000963447	0.001074101	0.000978037	0.000994198	0.002035207	0.00051325	0.000476246	0.00081555	0.001526752	0.000658699	0.001040122	0.000835347	0.00169482
MID	51	50	44	44	52	0	0.002256137	0.000569635	0.000359827	0.000359113	0.000641394	0.001152238	0.000963959	0.000985329	0.002155989	0.00053927	0.000506007	0.000846779	0.001550196	0.000615749	0.001033302	0.000809471	0.001506503
MID	51	50	44	44	52	0	0.002233343	0.000604605	0.000361349	0.000324397	0.000681105	0.001147927	0.00100408	0.0009878	0.002183277	0.000543523	0.000501837	0.000827327	0.001540791	0.000596456	0.001037277	0.000829758	0.001540191
MID	51	50	44	44	52	0	0.002299102	0.000682355	0.000358233	0.000312197	0.000747032	0.001123925	0.00096736	0.001017445	0.002183177	0.000542099	0.000488225	0.000811812	0.001547415	0.000630794	0.001035009	0.000816858	0.001436177
MID	51	50	44	44	52	0	0.002286332	0.000604872	0.000335217	0.000317293	0.000728953	0.001114803	0.00095506	0.001025372	0.002161148	0.000497861	0.000426862	0.000787984	0.001517258	0.000595039	0.001035904	0.000789799	0.001510051
MID	51	50	44	44	52	0	0.002334317	0.000561539	0.000347388	0.000328995	0.000710639	0.001130577	0.001017813	0.001036372	0.002195058	0.000521004	0.000464395	0.0007936	0.001502784	0.000617841	0.001028775	0.000822528	0.001551646
MID	51	50	44	44	52	0	0.002319706	0.000563176	0.00034456	0.000304228	0.000639863	0.001136437	0.001045533	0.001000034	0.002195159	0.000548948	0.000463101	0.000780232	0.001518768	0.000599556	0.001021763	0.000836497	0.001545185
MID	51	50	44	44	52	0	0.002308488	0.000581604	0.000338788	0.00034774	0.00067769	0.001117104	0.001041964	0.00101157	0.002183898	0.000516152	0.00044196	0.000777764	0.001505403	0.000589938	0.001016489	0.000805551	0.001526132
MID	51	50	44	44	52	0	0.002302844	0.000490019	0.000340796	0.000330602	0.000599138	0.001148983	0.001047489	0.001006496	0.002172218	0.000535534	0.00046531	0.000807569	0.001512317	0.000620296	0.001010163	0.000805581	0.001535729
MID	51	50	44	44	52	0	0.002262416	0.000497607	0.000361739	0.000335453	0.000619386	0.001169703	0.001063945	0.000981661	0.002142795	0.000520738	0.000457909	0.000779513	0.001511093	0.000586954	0.001031088	0.000819723	0.001087505
MID	51	50	44	44	52	0	0.002304471	0.00054474	0.000335588	0.000323067	0.000621311	0.001131383	0.00092873	0.001044586	0.002153201	0.000534002	0.000483026	0.000777935	0.001504211	0.000614073	0.001029186	0.000818215	0.00196817
MID	51	50	44	44	52	0	0.002278322	0.000573199	0.00035947	0.000354982	0.000578108	0.001097532	0.000957382	0.001001398	0.002118356	0.000501908	0.000449968	0.000797131	0.001519922	0.000625005	0.001020098	0.000802655	0.001517146
MID	51	50	44	44	52	0	0.002239579	0.000627309	0.000357898	0.000355743	0.000692966	0.001110762	0.000997464	0.001010343	0.002138806	0.000508102	0.000476421	0.00079833	0.001490863	0.000598941	0.001026499	0.000796724	0.001508328
TXN	0	94	0	88	110	0	0.003137189	0.000707318	0.000498726	0.000538159	0.001040091	0.001620528	0.001449357	0.001339643	0.002984923	0.000751931	0.000705008	0.001121788	0.002091733	0.000977147	0.001408139	0.001086814	0.002139025
TXN	0	94	0	88	110	0	0.003105653	0.000749834	0.000475841	0.000473204	0.000980984	0.001588814	0.001408163	0.001341869	0.0029934	0.000735537	0.000704821	0.001121495	0.002044372	0.000940693	0.001403604	0.001076888	0.002109627
TXN	0	94	0	88	110	0	0.003100495	0.000801174	0.000465531	0.000471043	0.000877866	0.001606332	0.001476147	0.001383889	0.002992315	0.000738337	0.000669941	0.001120109	0.002073031	0.000943429	0.001378845	0.001087102	0.0020471
TXN	0	94	0	88	110	0	0.003097725	0.000860296	0.000470354	0.000454469	0.001034575	0.001595193	0.00138765	0.00137359	0.002982993	0.000734506	0.000673557	0.001104516	0.002045677	0.000914185	0.001396045	0.001065147	0.002236232
TXN	0	94	0	88	110	0	0.00310664	0.000813083	0.000462974	0.000446573	0.001105852	0.001601317	0.001404629	0.001384133	0.002985168	0.000737488	0.000682152	0.001096795	0.002054539	0.000928232	0.001392602	0.001072725	0.002077726
TXN	0	94	0	88	110	0	0.003143036	0.000846603	0.000466387	0.000469152	0.000940395	0.001582551	0.001477341	0.001417547	0.002999361	0.000711955	0.0006788	0.001108534	0.002037675	0.00094651	0.00138274	0.001080441	0.002119371
TXN	0	94	0	88	110	0	0.003107907	0.000771531	0.000443153	0.000462895	0.00090914	0.001570925	0.001367576	0.001345512	0.002986121	0.00067473	0.000623121	0.001095635	0.002044068	0.000898731	0.001367627	0.001077341	0.002151814
TXN	0	94	0	88	110	0	0.003091916	0.000819803	0.000483435	0.000471289	0.001047238	0.00157316	0.001378727	0.001377447	0.002986765	0.000708132	0.000672187	0.001112238	0.002037446	0.000941979	0.001374497	0.001071985	0.002138258
TXN	0	94	0	88	110	0	0.003125091	0.000777928	0.00046177	0.00046868	0.000901423	0.001556921	0.001342934	0.001416865	0.002974763	0.000729795	0.000680554	0.001083955	0.002026582	0.000927909	0.001360836	0.001058745	0.002127705
TXN	0	94	0	88	110	0	0.003000993	0.000753654	0.000483439	0.000506584	0.001009497	0.001559217	0.001391045	0.001323422	0.002875555	0.000693282	0.000682132	0.001090716	0.002008991	0.000948645	0.001336778	0.001057925	0.002046315
TXN	0	94	0	88	110	0	0.003005765	0.000777804	0.000471982	0.000529157	0.001078567	0.001562765	0.001390488	0.001297949	0.002926926	0.000719839	0.000703775	0.001080494	0.002037592	0.000916078	0.001334697	0.001055983	0.002040343
TXN	0	94	0	88	110	0	0.003063864	0.00087187	0.000461119	0.000504481	0.000866386	0.001541309	0.001432021	0.001353936	0.00294987	0.000723181	0.000678638	0.001073335	0.002035788	0.000934565	0.001322316	0.001036023	0.00206789
BX	100	0	0	79	0	0	0.001198683	0.00032085	0.000182716	0.000177835	0.000393087	0.00053823	0.00049738	0.000525973	0.000936131	0.0002924	0.000248978	0.000409458	0.000694523	0.000278908	0.000508311	0.000430404	0.000727077
BX	100	0	0	79	0	0	0.001180641	0.000227227	0.000151599	0.000166751	0.000301303	0.000545312	0.000437706	0.000466808	0.000907182	0.00028641	0.00023298	0.000403365	0.000671533	0.000246372	0.000540412	0.000433735	0.000723047
BX	100	0	0	79	0	0	0.001207202	0.000281613	0.000194535	0.000175917	0.000391955	0.000566375	0.000525898	0.000514268	0.000919658	0.000274063	0.00026662	0.000472848	0.000710437	0.000308982	0.000547067	0.000456799	0.000791442
BX	100	0	0	79	0	0	0.001205207	0.000347413	0.000184988	0.000166649	0.000427499	0.000534855	0.000464014	0.000523083	0.000929203	0.000253492	0.00023335	0.000420314	0.000694795	0.000263865	0.000501539	0.000405026	0.000802689
BX	100	0	0	79	0	0	0.001224115	0.000391039	0.000159125	0.000154719	0.000324082	0.000558064	0.000534592	0.000527913	0.00095316	0.000243348	0.000227422	0.000414149	0.000691219	0.000252044	0.000507988	0.000431817	0.000762377
BX	100	0	0	79	0	0	0.001200745	0.000323098	0.00015547	0.000159356	0.000268934	0.000528943	0.000548217	0.000466314	0.000929633	0.000250009	0.000284487	0.000409842	0.000687929	0.000242151	0.000493611	0.000412915	0.000647964
BX	100	0	0	79	0	0	0.00120075	0.000291098	0.00017093	0.000213026	0.000312302	0.000506404	0.000495825	0.000468359	0.000911254	0.000238257	0.000242479	0.000392392	0.000681563	0.000236952	0.000522587	0.000421508	0.000690181
BX	100	0	0	79	0	0	0.001190165	0.000353946	0.000182101	0.000189253	0.000381783	0.000517121	0.000475112	0.000462336	0.000923678	0.000255388	0.000241148	0.000421849	0.00069281	0.000285035	0.000531377	0.000415339	0.000690033
BX	100	0	0	79	0	0	0.001187455	0.000243512	0.000156498	0.000121027	0.000267674	0.000497819	0.000485641	0.00045881	0.000917989	0.000241955	0.000219181	0.000388457	0.000695798	0.000233632	0.000510904	0.000434808	0.000618266
BX	100	0	0	79	0	0	0.001194905	0.000240782	0.000182943	0.00018303	0.000342764	0.000485399	0.000519108	0.00047461	0.000881835	0.000238022	0.000238899	0.000384688	0.000692333	0.000269482	0.000489122	0.000437548	0.000659599
BX	100	0	0	79	0	0	0.001159914	0.000296478	0.000176936	0.000169252	0.000325309	0.00048471	0.000543382	0.000481846	0.000903225	0.000261506	0.000255697	0.000412105	0.000676976	0.000269761	0.000485003	0.00041885	0.000746788
BX	100	0	0	79	0	0	0.001131805	0.000324938	0.00015118	0.000136571	0.000415604	0.000496853	0.000459703	0.00049671	0.000878075	0.000244211	0.000192642	0.000383274	0.000647954	0.000267902	0.000459349	0.000393076	0.000752056
EXN	0	0	93	94	120	0	0.003745141	0.000983825	0.000576293	0.000545624	0.001059471	0.00187935	0.001639924	0.00163172	0.003670099	0.000824704	0.000795735	0.0013056	0.002502001	0.001152682	0.001649802	0.001296018	0.002551545
EXN	0	0	93	94	120	0	0.003622399	0.001040878	0.000552964	0.00055252	0.001063364	0.001857299	0.001624673	0.001568878	0.003629474	0.00083609	0.000805725	0.001294784	0.002492735	0.001105358	0.001625745	0.001269013	0.002532026
EXN	0	0	93	94	120	0	0.003617663	0.000929438	0.000571982	0.000577991	0.001154818	0.001869024	0.001610427	0.001571709	0.003611587	0.000831901	0.000796022	0.001312482	0.002500262	0.001088855	0.001627398	0.001314663	0.002624907
EXN	0	0	93	94	120	0	0.003598948	0.000935231	0.000583779	0.000568933	0.000643134	0.001885741	0.001615993	0.001566967	0.003627145	0.00086917	0.000796787	0.001322112	0.002521238	0.001097891	0.001641974	0.001293487	0.002532691
EXN	0	0	93	94	120	0	0.003626784	0.001003805	0.00059925	0.000587309	0.001239137	0.001892856	0.001698821	0.001602066	0.003632241	0.000885685	0.000838754	0.001301078	0.002541161	0.001133761	0.001616918	0.001303742	0.002614068
EXN	0	0	93	94	120	0	0.003639989	0.000960149	0.000580595	0.000552996	0.001202687	0.001831853	0.001643183	0.001588286	0.003589333	0.000844804	0.000811289	0.001284671	0.002518017	0.001125539	0.00161487	0.001276823	0.002672602
EXN	0	0	93	94	120	0	0.003602537	0.000903523	0.000582165	0.000540608	0.001193328	0.001824874	0.001651713	0.001554857	0.003579254	0.000860494	0.000784316	0.001283505	0.00250771	0.00113496	0.001601	0.001260214	0.002474858
EXN	0	0	93	94	120	0	0.003562857	0.000961183	0.000586228	0.000584585	0.001112407	0.001805119	0.001592021	0.001519059	0.003553339	0.000864089	0.000816665	0.001315247	0.002509984	0.001136099	0.001574493	0.001236271	0.002548634
EXN	0	0	93	94	120	0	0.003530887	0.000988274	0.000576815	0.000591666	0.001029051	0.001777332	0.001607089	0.001529317	0.003538741	0.000874414	0.000803612	0.001316841	0.002490905	0.001129035	0.001570919	0.001231921	0.002596806
EXN	0	0	93	94	120	0	0.003567269	0.001001882	0.000575496	0.000593877	0.001110335	0.001770042	0.001630369	0.001574426	0.003533721	0.000857505	0.000759242	0.001295553	0.002487561	0.001152842	0.001555433	0.001237395	0.00261355
EXN	0	0	93	94	120	0	0.003552545	0.000956179	0.000583062	0.000612248	0.001049094	0.001806194	0.001582165	0.001578541	0.003524574	0.000888533	0.000810576	0.001306136	0.002502395	0.001192244	0.00155218	0.001249749	0.002542512
EXN	0	0	93	94	120	0	0.003412126	0.000945874	0.000572403	0.000631421	0.000961862	0.001677767	0.001627018	0.001491469	0.003422131	0.000913891	0.000795342	0.001260712	0.002451303	0.001173759	0.00144847	0.001139635	0.002255293
METH	0	0	0	0	0	0	2.43E-05	0.000186189	3.63E-06	-3.27E-05	0.000139217	3.84E-05	-1.66E-05	5.11E-05	2.53E-05	5.18E-06	1.02E-05	1.13E-05	0.000590967	-9.62E-06	2.31E-05	6.99E-05	0.000152629
METH	0	0	0	0	0	0	0.000129149	0.000171185	3.96E-05	-0.000155771	0.000289857	0.000163504	0.000172106	0.00012357	0.000122626	0.000118971	6.54E-05	6.20E-05	0.00034215	2.83E-05	0.000181284	0.000151764	0.000267893
METH	0	0	0	0	0	0	-1.02E-05	-6.26E-06	2.09E-05	-0.000301251	-0.000105898	-1.53E-05	-1.39E-05	-4.66E-06	-2.79E-05	-4.52E-05	1.40E-05	6.76E-05	0.000103285	1.94E-05	5.25E-06	1.29E-05	5.12E-05
METH	0	0	0	0	0	0	6.44E-05	-3.49E-07	3.62E-06	2.70E-05	7.81E-06	1.46E-05	4.02E-05	7.82E-05	1.76E-05	-1.17E-05	3.08E-05	2.51E-06	0.000181622	1.96E-05	3.87E-05	5.56E-05	4.75E-05
METH	0	0	0	0	0	0	5.66E-05	4.88E-05	3.73E-05	8.42E-05	2.27E-05	3.41E-05	0.000115808	0.000117246	3.34E-05	4.04E-05	4.49E-05	4.43E-05	0.000351223	5.72E-05	3.86E-05	5.34E-05	1.40E-05
METH	0	0	0	0	0	0	6.49E-05	1.92E-05	3.09E-05	5.24E-05	0.000152306	5.11E-05	6.06E-05	0.000129172	3.51E-05	2.32E-05	2.61E-05	2.81E-05	0.000317621	3.77E-05	5.34E-05	7.13E-05	0.000131159
METH	0	0	0	0	0	0	8.68E-05	3.74E-05	3.11E-05	9.94E-06	0.000143158	8.08E-05	8.27E-05	7.30E-05	5.36E-05	3.85E-05	6.89E-05	4.86E-05	0.000279382	3.91E-05	6.28E-05	8.69E-05	0.00014176
METH	0	0	0	0	0	0	3.88E-05	-1.86E-05	6.47E-06	-4.47E-05	2.17E-05	4.75E-06	2.89E-05	-1.13E-06	5.12E-05	1.50E-05	2.45E-05	4.48E-05	0.000332726	1.68E-05	3.04E-05	2.66E-05	0.000105823
METH	0	0	0	0	0	0	3.46E-05	2.18E-05	2.84E-05	-2.96E-05	8.85E-05	6.57E-05	6.20E-05	4.25E-05	4.33E-05	3.03E-05	2.56E-05	2.88E-05	8.17E-05	1.67E-05	6.28E-05	5.26E-05	0.000142896
METH	0	0	0	0	0	0	5.88E-05	0.000139773	2.86E-05	2.80E-05	7.84E-05	8.54E-05	5.46E-05	9.92E-05	6.98E-05	5.27E-05	1.40E-05	5.16E-05	5.36E-05	3.75E-05	5.81E-05	7.02E-05	9.76E-05
METH	0	0	0	0	0	0	2.97E-05	2.39E-05	-1.94E-06	-1.19E-05	-8.20E-06	7.82E-05	2.01E-05	3.52E-05	4.05E-05	1.52E-05	9.29E-06	1.27E-05	0.00036475	3.88E-05	5.71E-05	6.95E-05	9.68E-05
METH	0	0	0	0	0	0	3.89E-05	0.000137043	3.60E-05	1.20E-05	4.66E-05	5.27E-05	5.66E-05	7.35E-05	2.93E-05	4.05E-05	1.14E-05	4.24E-05	2.30E-05	3.68E-05	5.26E-05	6.24E-05	0.000152378
BTEX	100	93	92	93	0	0	0.002501134	0.000685263	0.000395769	0.000412729	0.000837707	0.001078235	0.001001613	0.001073552	0.002220623	0.00058318	0.000461001	0.000871637	0.000527419	0.00068776	0.001060395	0.000906782	0.00175562
BTEX	100	93	92	93	0	0	0.002370108	0.000585649	0.000357056	0.000402871	0.000925798	0.001049292	0.001035782	0.000956452	0.002158036	0.000524842	0.00044852	0.00084361	0.000543835	0.00067312	0.001026315	0.000850471	0.001691575
BTEX	100	93	92	93	0	0	0.002357662	0.000572302	0.000380246	0.000412753	0.000839085	0.001110414	0.001019618	0.000935687	0.002149767	0.000517667	0.000474846	0.000850318	0.000588041	0.000672745	0.001037086	0.000874879	0.001723762
BTEX	100	93	92	93	0	0	0.002376626	0.000651394	0.000391349	0.000391723	0.000749343	0.00108494	0.00094631	0.00093658	0.00217442	0.0005135	0.000449867	0.000825997	0.000563968	0.000687252	0.001008611	0.000888896	0.00167705
BTEX	100	93	92	93	0	0	0.002393966	0.000591157	0.000369332	0.000352718	0.000762766	0.00106524	0.000999487	0.001019115	0.00214231	0.000523066	0.000477968	0.000843695	0.000597141	0.000672691	0.001045175	0.000888417	0.001677747
BTEX	100	93	92	93	0	0	0.002332133	0.000712485	0.000382033	0.000338052	0.000855285	0.001067365	0.000978194	0.001010452	0.002145393	0.000523552	0.000443297	0.000823113	0.000594067	0.000698943	0.001029609	0.000860108	0.001791199
BTEX	100	93	92	93	0	0	0.002341663	0.000614163	0.000372109	0.000342992	0.000758246	0.001055505	0.001006313	0.00096033	0.002141968	0.000513902	0.000428902	0.000805082	0.000618906	0.000658755	0.001031748	0.000850209	0.001732542
BTEX	100	93	92	93	0	0	0.002317209	0.000609582	0.00037663	0.000357873	0.000804453	0.001045361	0.000967558	0.00096088	0.002124087	0.000528535	0.000443177	0.000797857	0.000615084	0.000687052	0.000999937	0.000887047	0.001712599
BTEX	100	93	92	93	0	0	0.002299648	0.000533976	0.000388363	0.000361833	0.000863404	0.001067067	0.001018106	0.000979438	0.002089189	0.000543108	0.000442058	0.000834118	0.000645046	0.000672095	0.001021363	0.000863521	0.001574633
BTEX	100	93	92	93	0	0	0.002278858	0.000549019	0.000381175	0.000368145	0.000843397	0.001053401	0.000930705	0.000932003	0.002066108	0.000502134	0.000436601	0.000816374	0.000648304	0.000658162	0.001020376	0.000854087	0.001639309
BTEX	100	93	92	93	0	0	0.002255326	0.000503289	0.000369017	0.000355192	0.00072846	0.001059964	0.000967822	0.000883396	0.00206166	0.000484243	0.000449226	0.000839504	0.000626408	0.000656385	0.001005356	0.000847282	0.001706081
BTEX	100	93	92	93	0	0	0.002301765	0.000626349	0.000366271	0.00037636	0.000752618	0.00101611	0.000946601	0.001030235	0.002064259	0.000511694	0.000458418	0.000812621	0.00064593	0.000666547	0.000985113	0.000845179	0.001649846
BXN	100	0	0	98	120	0	0.002708869	0.000770854	0.000344324	0.000504976	0.000823604	0.001433351	0.00119584	0.001198829	0.002611021	0.000620386	0.000571261	0.000998841	0.000855186	0.000829504	0.001174082	0.000961056	0.001660923
BXN	100	0	0	98	120	0	0.002682651	0.0008586	0.000343828	0.00046023	0.000862503	0.001435077	0.001178704	0.001146863	0.002651059	0.000623446	0.000501289	0.001002144	0.00084547	0.000854686	0.001196129	0.000951346	0.002143992
BXN	100	0	0	98	120	0	0.002712414	0.000788121	0.00033397	0.000427851	0.000799372	0.001416959	0.00120671	0.001202559	0.002619135	0.000636962	0.000525294	0.000952333	0.00086398	0.000876539	0.001197274	0.000962804	0.001941148
BXN	100	0	0	98	120	0	0.002755281	0.000750662	0.000339015	0.00047315	0.000827981	0.001413974	0.001239326	0.001183238	0.002640983	0.000638889	0.000552044	0.001008015	0.000880556	0.000869522	0.001205084	0.000957392	0.00193022
BXN	100	0	0	98	120	0	0.002744375	0.000759611	0.000291531	0.000403681	0.000867838	0.001393879	0.001184638	0.001191839	0.002629712	0.000445801	0.000734706	0.000972042	0.000863966	0.000842434	0.001167188	0.000983775	0.002087674
BXN	100	0	0	98	120	0	0.002798333	0.000714836	0.000333835	0.000461105	0.000749124	0.001414653	0.001286875	0.001170937	0.002707904	0.000441078	0.000540312	0.000999324	0.000882905	0.000838129	0.001155776	0.000954611	0.001652177
BXN	100	0	0	98	120	0	0.002831814	0.000717723	0.000347663	0.000441983	0.000886758	0.001454916	0.00127633	0.001184709	0.002744714	0.000468135	0.00056344	0.00101064	0.000939279	0.000876095	0.00119945	0.000972808	0.002167429
BXN	100	0	0	98	120	0	0.002848328	0.000698871	0.000346478	0.000435218	0.000820422	0.001417517	0.001217056	0.001219391	0.002725119	0.000473443	0.00058635	0.001013045	0.000934154	0.000863462	0.00118775	0.000987223	0.001847515
BXN	100	0	0	98	120	0	0.002780271	0.000710548	0.00035137	0.000488743	0.000816968	0.00144836	0.001244766	0.001219431	0.002727423	0.000509832	0.000536872	0.001015454	0.000946945	0.000896028	0.001192474	0.000980722	0.00200655
BXN	100	0	0	98	120	0	0.002782734	0.000706811	0.000362159	0.000502535	0.000925798	0.001433438	0.00120812	0.00121178	0.002723648	0.000541171	0.000568417	0.001013199	0.000936658	0.000903406	0.001183101	0.000979917	0.002025882
BXN	100	0	0	98	120	0	0.002772349	0.000758186	0.000344176	0.000479062	0.000845732	0.001449884	0.001281742	0.001176945	0.002683587	0.000602941	0.000545363	0.00101482	0.00094312	0.000896216	0.001193487	0.0009723	0.002051099
BXN	100	0	0	98	120	0	0.0027582	0.000740166	0.000350084	0.000475815	0.000921846	0.001379342	0.001240491	0.001158203	0.00268756	0.000550584	0.000544022	0.000992095	0.00092219	0.000883643	0.001150229	0.000955418	0.00191439
TN	0	110	0	0	160	0	0.002293906	0.000595619	0.000287332	0.000499556	0.00058429	0.001168169	0.000907922	0.001016305	0.002292036	0.000573146	0.000461252	0.000717064	0.001454979	0.000655668	0.000854028	0.000803141	0.001689364
TN	0	110	0	0	160	0	0.002247486	0.000632494	0.000292063	0.000434794	0.00069245	0.001124196	0.000858825	0.001019984	0.002300422	0.000586687	0.000468123	0.000701185	0.001446165	0.000618009	0.000826027	0.000815327	0.001581976
TN	0	110	0	0	160	0	0.002210081	0.000629912	0.000243012	0.000420991	0.000582896	0.001091788	0.000857019	0.000959492	0.002237366	0.000542183	0.000417404	0.000666243	0.001437159	0.00056504	0.000797539	0.0007529	0.001559907
TN	0	110	0	0	160	0	0.002196191	0.000562336	0.000238695	0.000430143	0.000790197	0.001090083	0.000879104	0.000943629	0.002237988	0.000534493	0.000400378	0.000675362	0.001401436	0.000549626	0.000803876	0.000748992	0.001544786
TN	0	110	0	0	160	0	0.002212672	0.000570122	0.000248068	0.000435741	0.000601055	0.001102406	0.000859797	0.000922177	0.002243839	0.000534043	0.000424085	0.000694224	0.001418697	0.000584646	0.000793969	0.000758057	0.001593444
TN	0	110	0	0	160	0	0.002215997	0.000569069	0.000240519	0.000401084	0.000789571	0.001099555	0.000874595	0.00095147	0.002242096	0.000519387	0.000436129	0.00069182	0.001387828	0.000570342	0.000805037	0.000782099	0.001662555
TN	0	110	0	0	160	0	0.002209748	0.000597554	0.000258668	0.000430341	0.000708401	0.001123156	0.000927172	0.000925043	0.002243521	0.000537965	0.000460175	0.000712022	0.001421969	0.000625833	0.000817397	0.000790245	0.001615284
TN	0	110	0	0	160	0	0.002190638	0.000555396	0.000264401	0.000400711	0.000605452	0.001119572	0.000869549	0.000942162	0.002237778	0.000518663	0.000407685	0.000698036	0.001418787	0.000567657	0.000806113	0.000752777	0.001578781
TN	0	110	0	0	160	0	0.002208298	0.00068932	0.000276139	0.000460722	0.000680136	0.001120746	0.000869053	0.000947047	0.002250754	0.000540826	0.000472126	0.000706838	0.00143944	0.000612917	0.000806689	0.000770923	0.001566214
TN	0	110	0	0	160	0	0.00221502	0.000544954	0.000242683	0.000415454	0.000607969	0.001105564	0.000849583	0.000922703	0.00222995	0.000509539	0.000403639	0.000676832	0.001412102	0.000584276	0.000789173	0.000722316	0.001559699
TN	0	110	0	0	160	0	0.002204505	0.000544072	0.000237296	0.00035342	0.000610221	0.001073064	0.00085309	0.000890807	0.002225673	0.000493205	0.000405866	0.000663188	0.001395248	0.000570822	0.000782726	0.000746235	0.001571468
TN	0	110	0	0	160	0	0.002198907	0.000665085	0.00029135	0.000471162	0.000684538	0.001123276	0.00090649	0.000967511	0.002247161	0.000529957	0.000431027	0.000700372	0.001442487	0.000616999	0.000800226	0.000761049	0.001443956
TEN	0	110	110	0	100	0	0.003026475	0.000884945	0.000356072	0.000519043	0.001041711	0.00152735	0.001193707	0.001272419	0.003104878	0.00071096	0.000568167	0.000925638	0.001957031	0.000755259	0.001133456	0.001065141	0.002145201
TEN	0	110	110	0	100	0	0.003030671	0.000874523	0.000353427	0.000488817	0.001103246	0.001535109	0.001193165	0.001256725	0.003076137	0.000708685	0.000566998	0.000920436	0.001947305	0.000738693	0.001113038	0.001080724	0.002247416
TEN	0	110	110	0	100	0	0.003042314	0.000874156	0.000341653	0.000529466	0.000952799	0.001490511	0.001159794	0.001291308	0.003070958	0.000726094	0.000568359	0.000900616	0.00194894	0.000741062	0.001110242	0.001046187	0.002193324
TEN	0	110	110	0	100	0	0.003037811	0.000879627	0.000335719	0.000509876	0.000842252	0.001516884	0.001155404	0.001290981	0.003106141	0.000754103	0.000546172	0.000907195	0.001944968	0.00078001	0.001115507	0.001079944	0.002275825
TEN	0	110	110	0	100	0	0.002937722	0.000768024	0.000345601	0.000489877	0.000989093	0.001513304	0.001139199	0.001212248	0.003051248	0.000669278	0.000547824	0.000900811	0.001925403	0.000733344	0.001106916	0.001034981	0.00232761
TEN	0	110	110	0	100	0	0.003008265	0.000878586	0.000355306	0.000463117	0.00101158	0.00152565	0.001206222	0.001272702	0.003121752	0.000722971	0.000555504	0.000875398	0.00190792	0.000731124	0.001132196	0.00106345	0.002301273
TEN	0	110	110	0	100	0	0.003017989	0.000920102	0.000364393	0.000536866	0.000949942	0.001540556	0.001164355	0.001242727	0.003104089	0.000708714	0.000570081	0.000868004	0.001934329	0.000757206	0.001141262	0.001056817	0.002226436
TEN	0	110	110	0	100	0	0.003003771	0.000870236	0.0003372	0.000500458	0.001018513	0.001521772	0.001129286	0.001230963	0.003082234	0.000707734	0.000576946	0.000877167	0.001934283	0.000732777	0.001119798	0.001053325	0.002183564
TEN	0	110	110	0	100	0	0.003032376	0.000843942	0.000349468	0.000504127	0.000970738	0.00150789	0.001107564	0.001246352	0.003081385	0.000686842	0.000542694	0.000886816	0.001935706	0.000706031	0.001140429	0.001042188	0.00228161
TEN	0	110	110	0	100	0	0.002995023	0.000805512	0.000340777	0.000547404	0.000926915	0.00151555	0.001138537	0.001237055	0.003069021	0.000678368	0.000567906	0.000890956	0.001927303	0.000764329	0.001113349	0.001078649	0.002200908
TEN	0	110	110	0	100	0	0.002976406	0.000727156	0.000325723	0.000481663	0.00106419	0.001456652	0.001146155	0.001222771	0.003027211	0.000686124	0.000562006	0.000883523	0.001933903	0.000721295	0.001097838	0.001034589	0.002332447
TEN	0	110	110	0	100	0	0.002977048	0.000761322	0.000358192	0.000547137	0.00097484	0.001493062	0.001147014	0.001267673	0.003009048	0.000655977	0.000573744	0.000884509	0.001931777	0.000776518	0.001084764	0.001053938	0.002290275
X	0	0	0	94	0	0	0.001048352	0.000362236	0.000128608	0.000191829	0.000383666	0.000448987	0.000400985	0.000478737	0.000803369	0.000256995	0.000176425	0.000390241	0.000439397	0.000226632	0.000391803	0.000345068	0.000591046
X	0	0	0	94	0	0	0.001020984	0.000271104	0.000109611	0.000145311	0.000294522	0.000431508	0.000328398	0.000468072	0.00079993	0.000228837	0.000150414	0.000369868	0.000404899	0.000197234	0.00039822	0.000349422	0.000664731
X	0	0	0	94	0	0	0.000984659	0.000221255	0.000121802	0.000158056	0.000270446	0.000415319	0.000357418	0.00042714	0.000773694	0.000195229	0.000162528	0.000402788	0.00041797	0.000185929	0.000377104	0.000337763	0.000587603
X	0	0	0	94	0	0	0.00098101	0.000328804	0.000130347	0.000158828	0.000163261	0.000420412	0.000356531	0.000440446	0.000791744	0.000242181	0.000179168	0.000399465	0.000430216	0.000202178	0.000398517	0.000363682	0.000697754
X	0	0	0	94	0	0	0.000992865	0.000254668	0.000113788	0.000179574	0.000381081	0.000381146	0.000333352	0.000404203	0.000775405	0.000222672	0.000166795	0.000389868	0.000405374	0.000221192	0.000352938	0.00032645	0.000586561
X	0	0	0	94	0	0	0.000969012	0.00014956	0.000119489	0.000134916	0.000422262	0.000417354	0.000449067	0.000387985	0.000756172	0.000241534	0.000191017	0.000392802	0.000388016	0.000208376	0.000381732	0.000366547	0.000624164
X	0	0	0	94	0	0	0.000940527	0.000232381	0.000133438	0.000166417	-0.000392067	0.000380854	0.00033864	0.000410621	0.000745165	0.000224354	0.000204045	0.00038198	0.000386179	0.00020476	0.000353768	0.000336049	0.000570419
X	0	0	0	94	0	0	0.000949525	0.000240127	0.000148684	0.000177256	0.000169186	0.000417479	0.000369031	0.000480098	0.000738681	0.00023123	0.000203515	0.000354289	0.000406584	0.000222677	0.000369639	0.000338807	0.000711181
X	0	0	0	94	0	0	0.000977698	0.00032839	0.000120608	0.000143933	0.000233882	0.000424628	0.000389066	0.000435633	0.00076614	0.000249726	0.00019242	0.000376491	0.000413882	0.000221704	0.000387604	0.000338271	0.00063431
X	0	0	0	94	0	0	0.000950486	0.000314296	0.000110791	0.000148903	0.000277451	0.000392277	0.000392251	0.00043085	0.000756728	0.000226935	0.000151513	0.000362133	0.000400438	0.000226799	0.000386664	0.000339403	0.00055211
X	0	0	0	94	0	0	0.000947213	0.000349304	0.000142184	0.000190265	0.000211617	0.000427198	0.000323124	0.000449551	0.000757416	0.000256844	0.000241549	0.000385836	0.000420103	0.000270509	0.000406299	0.000364245	0.000594224
X	0	0	0	94	0	0	0.000925417	0.00027777	0.000135846	0.000160184	0.00013661	0.000376004	0.000333374	0.000375953	0.000728727	0.00023845	0.000174484	0.000351851	0.00037864	0.000224285	0.000372737	0.000332086	0.000504646
BTEXN	98	92	92	92	130	0	0.0037917	0.001085502	0.000504927	0.00072992	0.00136624	0.001982963	0.001569238	0.00166588	0.003841478	0.000948828	0.000783771	0.001508223	0.002005408	0.000966915	0.0016365	0.001416319	0.003011972
BTEXN	98	92	92	92	130	0	0.003717255	0.00111662	0.000496201	0.000660654	0.001329325	0.00193564	0.001589345	0.001669372	0.003796471	0.00093578	0.0007653	0.001473409	0.001989627	0.000961084	0.001619316	0.001388083	0.002917991
BTEXN	98	92	92	92	130	0	0.003713317	0.001060058	0.000486154	0.000657222	0.001304631	0.001951273	0.001601221	0.00164949	0.003781887	0.000904926	0.000766058	0.001476154	0.001997792	0.000928062	0.0015998	0.001375074	0.002895349
BTEXN	98	92	92	92	130	0	0.00368495	0.001130907	0.000494727	0.00069477	0.001231221	0.001949547	0.001575148	0.001604973	0.003801555	0.000913644	0.000751386	0.001498827	0.001993481	0.000946366	0.001599679	0.001395542	0.002969947
BTEXN	98	92	92	92	130	0	0.00370698	0.001103621	0.0004856	0.000663351	0.001238318	0.001956235	0.001587295	0.001602813	0.003795309	0.00088907	0.000727096	0.001476416	0.001999979	0.000936458	0.001633032	0.001388294	0.002913153
BTEXN	98	92	92	92	130	0	0.003705965	0.001083925	0.000485005	0.000622526	0.001377315	0.001987549	0.001555246	0.001624445	0.003782159	0.000888139	0.000718565	0.00148736	0.00200159	0.000929767	0.001615234	0.001392799	0.002976357
BTEXN	98	92	92	92	130	0	0.003710597	0.001046045	0.000502371	0.000715454	0.001325411	0.001964016	0.001556734	0.00164282	0.003766338	0.000909311	0.000785848	0.001482739	0.002001966	0.000941393	0.001623772	0.001375358	0.002847247
BTEXN	98	92	92	92	130	0	0.003724487	0.001020003	0.000482526	0.000705248	0.001269927	0.001951472	0.001574597	0.00165984	0.003762133	0.000911072	0.000768648	0.001497981	0.001983027	0.000928266	0.00162409	0.001398519	0.002981862
BTEXN	98	92	92	92	130	0	0.003707845	0.00102643	0.000484539	0.000668358	0.001482998	0.001923324	0.001521704	0.001639196	0.003769202	0.000884843	0.000750848	0.001453865	0.00197431	0.000927243	0.001588001	0.001349451	0.002762689
BTEXN	98	92	92	92	130	0	0.00367279	0.001002972	0.000477444	0.000658926	0.001384373	0.001958885	0.001520671	0.001582647	0.00375103	0.000869355	0.000733157	0.00146391	0.001970876	0.000944386	0.001604969	0.001398913	0.002963754
BTEXN	98	92	92	92	130	0	0.003699462	0.001090977	0.000499921	0.000677721	0.001277274	0.001937077	0.001556377	0.001629488	0.003742724	0.000883594	0.000763396	0.00143741	0.001982029	0.000944826	0.001610445	0.001405445	0.002646424
BTEXN	98	92	92	92	130	0	0.003654045	0.001113964	0.000491154	0.000668229	0.001359553	0.001898825	0.001581879	0.00163216	0.00372007	0.000891847	0.000743188	0.001458867	0.001949019	0.000924819	0.001599982	0.001385033	0.002994889
TX	0	92	0	87	0	0	0.00137768	0.000268487	0.000158648	0.000244945	0.000392129	0.00063656	0.00053497	0.000577157	0.001133453	0.000289474	0.000252953	0.000507314	0.000604393	0.000287581	0.000579133	0.000519701	0.000938549
TX	0	92	0	87	0	0	0.001390702	0.000344568	0.00015542	0.000238874	0.000305481	0.000637306	0.000542062	0.000600837	0.001152949	0.000306818	0.000224491	0.000478665	0.000588221	0.000284909	0.000582246	0.000492486	0.000944715
TX	0	92	0	87	0	0	0.00137863	0.000369056	0.000164168	0.000196667	0.000486762	0.000646058	0.000561622	0.000619276	0.001142462	0.000322445	0.000227764	0.000472378	0.000601434	0.000278909	0.000579998	0.000507253	0.001017459
TX	0	92	0	87	0	0	0.001408017	0.000382071	0.00017621	0.000230254	0.00054551	0.000647021	0.000562795	0.000640529	0.001155645	0.000331008	0.000238465	0.000520446	0.000622522	0.000294628	0.000598845	0.000496852	0.000935254
TX	0	92	0	87	0	0	0.001380831	0.000286612	0.000168703	0.000221221	0.000510773	0.000624131	0.000532721	0.000594811	0.00113145	0.000325058	0.000232692	0.000513008	0.000615741	0.000258515	0.000584797	0.000512093	0.000923381
TX	0	92	0	87	0	0	0.001378152	0.000267109	0.000171668	0.000219126	0.000403684	0.000615808	0.000524201	0.000618892	0.001155632	0.000306632	0.000227161	0.000507673	0.000609374	0.00028499	0.000563095	0.000506219	0.000902507
TX	0	92	0	87	0	0	0.001389015	0.000366224	0.00018132	0.000261341	0.000509	0.000655263	0.000511008	0.000590723	0.001179224	0.000336063	0.000237429	0.000524183	0.00062204	0.000303376	0.000603003	0.000521219	0.000978474
TX	0	92	0	87	0	0	0.001382085	0.000439402	0.000162928	0.000212947	0.00035157	0.000654706	0.00054551	0.000606586	0.001173257	0.000308671	0.0002106	0.000477194	0.00060437	0.000238297	0.000563564	0.000513708	0.000993912
TX	0	92	0	87	0	0	0.001393316	0.000405404	0.000142466	0.000172333	0.000520564	0.000635368	0.000532158	0.000608071	0.001149197	0.000293322	0.000218218	0.000501632	0.000596553	0.000258291	0.00057343	0.000507836	0.001008606
TX	0	92	0	87	0	0	0.001326703	0.000330285	0.000171533	0.000195627	0.000437399	0.000623034	0.000531327	0.000578673	0.001098784	0.000278992	0.000213618	0.000511387	0.000579342	0.000274787	0.00054972	0.000477428	0.000807616
TX	0	92	0	87	0	0	0.001279513	0.000259003	0.000166517	0.000206099	0.000515086	0.000566744	0.000520149	0.000541134	0.001054613	0.000267237	0.000242545	0.000486722	0.000573669	0.000283873	0.000509507	0.000447298	0.000904636
TX	0	92	0	87	0	0	0.001312371	0.000370121	0.000151136	0.000191592	0.000426889	0.000591259	0.00047531	0.000560267	0.001080768	0.000297013	0.000238961	0.000476393	0.00055065	0.000295853	0.000502238	0.000478775	0.000981153
BEN	100	0	94	0	130	0	0.002812921	0.000780807	0.000323389	0.000504121	0.000912879	0.001402135	0.001080375	0.001137972	0.002782764	0.000637511	0.000516384	0.001008536	0.001432564	0.000601673	0.001121733	0.000956901	0.001964767
BEN	100	0	94	0	130	0	0.002775003	0.000680513	0.000294796	0.000465547	0.000806905	0.001386602	0.001124418	0.001177501	0.002769153	0.000594231	0.00049052	0.001014657	0.001423704	0.000595963	0.001107014	0.000949213	0.001984143
BEN	100	0	94	0	130	0	0.002769333	0.000738067	0.000323576	0.00046897	0.000928466	0.001365553	0.001106304	0.001173738	0.002796292	0.000643647	0.000522931	0.001023764	0.001425335	0.000612349	0.001104799	0.000962267	0.002012766
BEN	100	0	94	0	130	0	0.002755858	0.000713378	0.000320508	0.000476558	0.000883011	0.001388219	0.001070548	0.001140552	0.002802635	0.000656433	0.000521455	0.00101038	0.001438647	0.000606528	0.001115713	0.000961954	0.001874425
BEN	100	0	94	0	130	0	0.002760397	0.000747607	0.000313136	0.000481565	0.000817882	0.001386869	0.001115904	0.001177242	0.00279316	0.000647777	0.000498089	0.001028011	0.001442401	0.000597474	0.00110187	0.000948607	0.001947192
BEN	100	0	94	0	130	0	0.002736387	0.000734535	0.000300978	0.000471544	0.000993603	0.001371051	0.001057656	0.001143833	0.002781131	0.000634135	0.000497079	0.001024646	0.001425398	0.00056472	0.001104095	0.000956539	0.002092797
BEN	100	0	94	0	130	0	0.002768342	0.000796705	0.000327461	0.000521752	0.000864404	0.001397184	0.001125599	0.001194879	0.002794232	0.000637712	0.000531492	0.001017897	0.001452453	0.000620091	0.001121237	0.000970555	0.001956202
BEN	100	0	94	0	130	0	0.002787063	0.000879663	0.000318074	0.000494084	0.000917431	0.001410952	0.001137602	0.001182984	0.002812743	0.000656522	0.000538491	0.001023932	0.001466819	0.000633346	0.001096067	0.00095104	0.002036626
BEN	100	0	94	0	130	0	0.002800287	0.000715466	0.000316557	0.000458741	0.000875325	0.001382409	0.001080991	0.001198003	0.002787838	0.000627891	0.000514974	0.001016246	0.001442311	0.000600231	0.001083256	0.000952738	0.002036718
BEN	100	0	94	0	130	0	0.002740006	0.000695973	0.000339895	0.000509202	0.000764461	0.00141467	0.001151719	0.001155257	0.002765512	0.000633482	0.000511231	0.001042606	0.001445407	0.000623577	0.001102152	0.000983671	0.002006439
BEN	100	0	94	0	130	0	0.002760412	0.000741378	0.000319327	0.000486413	0.000802944	0.001349203	0.001099278	0.001182601	0.002753098	0.000611928	0.00052088	0.001005784	0.00143555	0.00060003	0.001090453	0.000936947	0.001887555
BEN	100	0	94	0	130	0	0.002767985	0.000643598	0.000306768	0.00053167	0.0008022	0.001378582	0.001074538	0.001176865	0.002758296	0.000652002	0.000540435	0.001047962	0.001441055	0.000652792	0.001108606	0.000954227	0.00213217
N	0	0	0	0	140	0	0.001960032	0.000495802	0.000189659	0.000329967	0.000444493	0.000974854	0.000807366	0.000809118	0.001905495	0.0004128	0.000369248	0.000673802	0.000980078	0.000385388	0.000738678	0.000603878	0.001276089
N	0	0	0	0	140	0	0.001947806	0.000580279	0.000186317	0.000335561	0.000480243	0.000997592	0.000855691	0.000862039	0.001903518	0.000455128	0.000374865	0.000719785	0.000989478	0.000385287	0.000724416	0.000622937	0.001306645
N	0	0	0	0	140	0	0.001901602	0.000449019	0.000185921	0.000370012	0.000528173	0.000959134	0.000781922	0.000853275	0.001883403	0.000438702	0.000345617	0.000694207	0.000952085	0.000379656	0.000725455	0.000611117	0.001140781
N	0	0	0	0	140	0	0.00189289	0.000457932	0.000176205	0.000342298	0.000481844	0.000918849	0.000764184	0.000745976	0.001876069	0.000444036	0.000366321	0.000693607	0.000960269	0.000363502	0.000727586	0.000617414	0.001245207
N	0	0	0	0	140	0	0.001956906	0.000546798	0.000186759	0.000351722	0.000503246	0.000932428	0.000800055	0.000850097	0.001901561	0.000467441	0.000365634	0.00068301	0.000974439	0.000401944	0.000693044	0.000604025	0.001303054
N	0	0	0	0	140	0	0.001966532	0.000442276	0.000193203	0.000317123	0.000473082	0.000978516	0.000783033	0.000791296	0.001903564	0.000455374	0.000364797	0.000683184	0.000976818	0.000408688	0.000706518	0.000626098	0.001301315
N	0	0	0	0	140	0	0.001951088	0.00041254	0.000177582	0.000315831	0.000491798	0.000931538	0.000739249	0.000784656	0.001891053	0.000434482	0.000331994	0.00064909	0.000972346	0.000368125	0.000715139	0.00059559	0.001182928
N	0	0	0	0	140	0	0.001955696	0.000450141	0.000197413	0.000342213	0.000575668	0.000934667	0.000789498	0.000814231	0.001882496	0.000425987	0.000354943	0.000661648	0.00097237	0.000391985	0.000704921	0.000592194	0.0012376
N	0	0	0	0	140	0	0.001933346	0.000487385	0.000191978	0.000324303	0.000576388	0.000966236	0.000799683	0.000829251	0.001855918	0.00044034	0.000359113	0.000714185	0.000989688	0.000397331	0.0007001	0.00061697	0.001328629
N	0	0	0	0	140	0	0.001909024	0.000480636	0.000183931	0.000342972	0.000498334	0.000954511	0.00076403	0.000781254	0.001896201	0.000410706	0.000330142	0.000712938	0.000964498	0.000362168	0.000699063	0.000596632	0.001074255
N	0	0	0	0	140	0	0.001935755	0.000527632	0.000188143	0.00031774	0.000523727	0.000950429	0.000764919	0.0008295	0.001873749	0.000447342	0.000330974	0.000679395	0.000963884	0.000388378	0.000717322	0.000592544	0.001226701
N	0	0	0	0	140	0	0.001911714	0.000480362	0.000175998	0.00030861	0.000501952	0.000921736	0.000775356	0.000792022	0.001881439	0.000433014	0.000344248	0.000664374	0.000979855	0.000366134	0.00068162	0.000593377	0.001248566
TE	0	94	89	0	0	0	0.001427146	0.000431907	0.000198228	0.000255306	0.000471909	0.000664376	0.000535421	0.000587257	0.001294596	0.000348682	0.000264126	0.000500272	0.000675917	0.000331158	0.000601122	0.000532737	0.001121737
TE	0	94	89	0	0	0	0.001404633	0.000460934	0.000175836	0.000235807	0.000377689	0.000647441	0.000558666	0.000556819	0.001282984	0.000324945	0.000237844	0.000465442	0.000678827	0.000319555	0.000597653	0.000539998	0.000922945
TE	0	94	89	0	0	0	0.001401666	0.000367248	0.000182393	0.000231925	0.000389666	0.000621485	0.00052608	0.000556905	0.001253246	0.000328914	0.000237489	0.000454145	0.000646233	0.000287987	0.000559999	0.000510518	0.000829342
TE	0	94	89	0	0	0	0.001381488	0.000462835	0.000174274	0.000218976	0.00050379	0.000621639	0.000528704	0.000584567	0.001267335	0.000325589	0.000231508	0.000457506	0.000643907	0.00028914	0.000565359	0.000497247	0.000946122
TE	0	94	89	0	0	0	0.001372751	0.000379279	0.000180472	0.000225926	0.000447622	0.000605103	0.00052225	0.000535823	0.001239505	0.000295848	0.000239096	0.000466648	0.000647892	0.000307629	0.000551338	0.000498033	0.000902329
TE	0	94	89	0	0	0	0.001335632	0.000344272	0.000156506	0.000199116	0.000347715	0.000619917	0.000476981	0.000525411	0.001246015	0.000294275	0.000228457	0.000488245	0.000656542	0.000293541	0.00055486	0.000494921	0.000826433
TE	0	94	89	0	0	0	0.001439166	0.000407472	0.000239209	0.00035674	0.000364281	0.000663901	0.000567523	0.000594841	0.001279383	0.000394938	0.000332283	0.000538993	0.000729809	0.000405519	0.00059898	0.000552876	0.000917968
TE	0	94	89	0	0	0	0.001236106	0.000363381	0.000152277	0.00021279	0.000397625	0.000560585	0.000436606	0.000498295	0.001133894	0.000277115	0.000168941	0.000410565	0.000612556	0.000278004	0.000513487	0.000463377	0.000712285
TE	0	94	89	0	0	0	0.001221865	0.000307173	0.000142089	0.000171348	0.000528997	0.000535004	0.000435208	0.000486577	0.001146752	0.000270636	0.00018906	0.000401829	0.000577411	0.000244191	0.000496959	0.000456726	0.000817519
TE	0	94	89	0	0	0	0.001266332	0.000323474	0.000144355	0.00018457	0.000398536	0.000577642	0.000472477	0.000497564	0.001158786	0.000283124	0.000192373	0.00043595	0.000597014	0.000256546	0.000522255	0.000462725	0.00088292
TE	0	94	89	0	0	0	0.001226701	0.000334698	0.000160212	0.000212713	0.000445375	0.000549735	0.000444406	0.00049489	0.001153065	0.000279424	0.000212073	0.000415935	0.000595146	0.000273894	0.000516921	0.000435126	0.000902557
TE	0	94	89	0	0	0	0.001238098	0.00031566	0.000165218	0.000241778	0.000394186	0.000465398	0.00045206	0.000497909	0.001123098	0.000249286	0.000240223	0.000449309	0.000602656	0.000296331	0.00041299	0.000388833	0.0006985
BTN	102	100	0	0	84	0	0.002315379	0.000618608	0.000289298	0.000441826	0.000683798	0.00117396	0.00092388	0.000967768	0.002336951	0.000558582	0.000455737	0.00071823	0.001497579	0.000630241	0.000879092	0.00080504	0.001567187
BTN	102	100	0	0	84	0	0.002230228	0.000666365	0.00026606	0.000460939	0.000704367	0.001153013	0.000917313	0.000961305	0.002314969	0.000542422	0.0004115	0.000684536	0.001472727	0.000585419	0.000866457	0.000761748	0.001526476
BTN	102	100	0	0	84	0	0.002247867	0.000665341	0.000279677	0.000474617	0.000763314	0.001186208	0.000936729	0.000976208	0.002334742	0.000549229	0.000414612	0.000701115	0.00146737	0.000604828	0.000850816	0.000797848	0.001793726
BTN	102	100	0	0	84	0	0.002231893	0.000641548	0.000290119	0.000452052	0.000782465	0.001154784	0.000921121	0.000934717	0.002308203	0.000529688	0.000384903	0.000676825	0.001438102	0.000615932	0.000839804	0.000803234	0.001745075
BTN	102	100	0	0	84	0	0.0022393	0.000711726	0.000256427	0.000418053	0.000737543	0.00116462	0.000885491	0.000919785	0.002290344	0.000522781	0.00037315	0.00068229	0.00144402	0.000612377	0.000821351	0.00077542	0.001608223
BTN	102	100	0	0	84	0	0.002239072	0.000619848	0.000278388	0.000395461	0.000847238	0.001155347	0.00091272	0.000970787	0.002292291	0.000525094	0.000382612	0.000665997	0.001467045	0.000579944	0.0008119	0.000776783	0.00158735
BTN	102	100	0	0	84	0	0.002234999	0.000668813	0.000255009	0.000407307	0.000658343	0.001158969	0.000829387	0.000981832	0.002280493	0.000545375	0.000360577	0.00064785	0.001442594	0.00058106	0.000807635	0.000763414	0.001517057
BTN	102	100	0	0	84	0	0.002243953	0.000672982	0.000263523	0.000446207	0.000651194	0.001144738	0.000891327	0.000961122	0.002311189	0.000545581	0.000420505	0.000655402	0.001473198	0.000593689	0.000832336	0.000767668	0.001564973
BTN	102	100	0	0	84	0	0.00223174	0.000661793	0.000274283	0.000435187	0.000624922	0.001169083	0.000915183	0.000978425	0.002320429	0.000539449	0.000382626	0.000674947	0.001469092	0.000607552	0.000841304	0.000772918	0.001553367
BTN	102	100	0	0	84	0	0.002233007	0.000692725	0.000296556	0.000479847	0.000648125	0.001160862	0.000909181	0.000984414	0.002306737	0.000530726	0.000418099	0.000697047	0.00149515	0.000644022	0.000812206	0.000779625	0.001646021
BTN	102	100	0	0	84	0	0.002253755	0.000633469	0.000305808	0.000452959	0.000762883	0.001172671	0.000929739	0.000981833	0.002310372	0.000553444	0.000421015	0.00069388	0.001486369	0.000627387	0.000830961	0.000786625	0.001537612
BTN	102	100	0	0	84	0	0.002214667	0.000623265	0.000277609	0.000422628	0.000775696	0.001157491	0.000894312	0.000930434	0.002312373	0.000506003	0.00041038	0.00068313	0.001455486	0.000596971	0.000810368	0.000766401	0.001499045
MID	49	53	55	58	75	0	0.002063393	0.000535121	0.000167713	0.000313603	0.000629451	0.00099534	0.000849898	0.000868597	0.001992161	0.000446396	0.000428499	0.000570324	0.001042681	0.000358092	0.000878379	0.000752963	0.001482178
MID	49	53	55	58	75	0	0.002026816	0.000610531	0.000189109	0.000314534	0.000748805	0.00103047	0.000787359	0.000897118	0.001994341	0.000485876	0.000367142	0.000554397	0.001032819	0.000384626	0.000855756	0.00076496	0.001524518
MID	49	53	55	58	75	0	0.001995152	0.000542183	0.000172084	0.000312606	0.000700101	0.001015303	0.000814954	0.000870993	0.001967824	0.000482425	0.000342213	0.000540777	0.001018537	0.000391568	0.000853962	0.000773567	0.001391017
MID	49	53	55	58	75	0	0.002016744	0.000510559	0.000193646	0.000324633	0.00080376	0.001024856	0.000867668	0.000857253	0.001966485	0.000474288	0.000356354	0.000572272	0.001036777	0.00038718	0.000854128	0.000767853	0.001578969
MID	49	53	55	58	75	0	0.002042449	0.000529947	0.000203495	0.000336887	0.000577437	0.001012764	0.000777918	0.000884585	0.001979317	0.000476563	0.000366334	0.000565149	0.001049154	0.000402912	0.000835268	0.000712578	0.001411425
MID	49	53	55	58	75	0	0.002099656	0.000597513	0.000216166	0.000356323	0.000601129	0.001033809	0.000850506	0.000956406	0.002012271	0.000470746	0.00035878	0.000574156	0.001050745	0.000368462	0.000872761	0.000757601	0.001469517
MID	49	53	55	58	75	0	0.002088974	0.000653073	0.000193899	0.000359686	0.000534539	0.001027928	0.000806584	0.000890629	0.002004859	0.000487749	0.000406194	0.000562933	0.001080709	0.000414488	0.000862779	0.000757502	0.001465841
MID	49	53	55	58	75	0	0.002098713	0.00058563	0.000188441	0.000311486	0.000853036	0.00105805	0.00087258	0.000926571	0.002027382	0.00047131	0.000384198	0.000543137	0.001053852	0.000387492	0.000849107	0.000756782	0.001429161
MID	49	53	55	58	75	0	0.002102638	0.000526504	0.000195008	0.000324651	0.000644735	0.001021029	0.000843469	0.000898997	0.002009867	0.0004534	0.000360187	0.000522252	0.001013116	0.000375882	0.000836507	0.000720979	0.001522999
MID	49	53	55	58	75	0	0.002095186	0.000634154	0.000193168	0.000313393	0.00072263	0.001045014	0.000799855	0.000927017	0.00202541	0.000496004	0.000369247	0.000531884	0.001039641	0.000408256	0.00087681	0.000771836	0.001371885
MID	49	53	55	58	75	0	0.00209543	0.000612699	0.000207482	0.0003125	0.000657534	0.001028497	0.000827929	0.000883961	0.002013458	0.000478337	0.000364731	0.000536534	0.001033342	0.000403384	0.000846139	0.000766454	0.001521291
MID	49	53	55	58	75	0	0.002042281	0.000559386	0.000181151	0.000337767	0.000804247	0.001019301	0.000809766	0.000888969	0.001969075	0.000452057	0.000363222	0.000554378	0.001027027	0.000400449	0.00086534	0.000751761	0.001582125
XN	0	0	0	110	110	0	0.002639498	0.000641144	0.00022683	0.000431883	0.000893922	0.001321718	0.001083941	0.00118179	0.002513142	0.000619071	0.000480601	0.000691545	0.001302156	0.000507939	0.001038882	0.000891879	0.00179877
XN	0	0	0	110	110	0	0.002602335	0.000670713	0.000224565	0.000393661	0.00083519	0.001333478	0.001032469	0.001153056	0.002524257	0.000604748	0.000473687	0.000684251	0.001301373	0.000501731	0.001069948	0.000906047	0.001875054
XN	0	0	0	110	110	0	0.00260925	0.000640015	0.000228055	0.000428979	0.00071704	0.001320213	0.001047606	0.001136914	0.002505838	0.000593195	0.000436538	0.000676965	0.001311118	0.0005043	0.001041565	0.000894305	0.001969668
XN	0	0	0	110	110	0	0.002594107	0.000688927	0.000222954	0.00042415	0.00080736	0.001284604	0.001086476	0.001121864	0.002483605	0.000564891	0.000480007	0.000668051	0.00132713	0.000502944	0.001020344	0.000872887	0.001763078
XN	0	0	0	110	110	0	0.002624856	0.000670929	0.000252296	0.000392474	0.000548587	0.001297862	0.001057218	0.001146486	0.002504493	0.00056824	0.000463324	0.000672013	0.001335978	0.00049262	0.001014477	0.000856536	0.001725916
XN	0	0	0	110	110	0	0.002607841	0.00066422	0.000223532	0.000411719	0.000787507	0.001298522	0.001049397	0.001100092	0.00253109	0.000576641	0.000481111	0.000693862	0.00133641	0.000477053	0.001023267	0.000881774	0.001754148
XN	0	0	0	110	110	0	0.002638333	0.000722162	0.000225791	0.000434557	0.00091153	0.001285673	0.001036987	0.001166109	0.0025286	0.000591295	0.000417011	0.000658254	0.001358211	0.0004889	0.00099767	0.000883371	0.001905314
XN	0	0	0	110	110	0	0.002628632	0.000764826	0.000243581	0.000425736	0.000847682	0.001300887	0.001033493	0.001136842	0.002531947	0.000595778	0.000446768	0.000679418	0.00133389	0.000472025	0.0010068	0.000874912	0.001850202
XN	0	0	0	110	110	0	0.002628836	0.000747813	0.000252744	0.000445865	0.000719508	0.001268955	0.00102387	0.001127425	0.002535596	0.000601186	0.000453132	0.000693928	0.001350512	0.000498787	0.001020601	0.000867175	0.001457403
XN	0	0	0	110	110	0	0.002600598	0.000756497	0.00022668	0.000422336	0.000760859	0.001312399	0.0010644	0.001112658	0.002551703	0.000609508	0.000442263	0.000670217	0.001342191	0.000510579	0.001035105	0.000891316	0.001898191
XN	0	0	0	110	110	0	0.002557779	0.000678659	0.000238218	0.000426716	0.000896857	0.001278171	0.000978074	0.001094227	0.002517956	0.000582637	0.000421975	0.000693462	0.001329966	0.000474036	0.00098354	0.000858513	0.001922855
XN	0	0	0	110	110	0	0.002566429	0.00065888	0.000240279	0.000436533	0.000736816	0.001268451	0.001034119	0.001052667	0.002484842	0.000566634	0.000432454	0.000714698	0.001336892	0.000481769	0.00100866	0.000871271	0.001893985
EN	0	0	120	0	110	0	0.002756356	0.000669989	0.000235446	0.000417511	0.000788916	0.001289448	0.001035833	0.001094769	0.002689074	0.000576929	0.000426463	0.00065611	0.001390438	0.000417389	0.001008308	0.000853035	0.00180294
EN	0	0	120	0	110	0	0.002690316	0.000791004	0.000229671	0.000395184	0.000678885	0.001316834	0.001091778	0.001086128	0.002696935	0.00059977	0.000398408	0.000655927	0.001386441	0.000446194	0.001004245	0.000857236	0.001759473
EN	0	0	120	0	110	0	0.00268735	0.000774136	0.000250191	0.000440691	0.000701564	0.001311183	0.001062954	0.001091478	0.002696886	0.000613949	0.000446052	0.0006856	0.001386565	0.000486845	0.001015419	0.000870613	0.001811804
EN	0	0	120	0	110	0	0.002741615	0.000735355	0.000254978	0.000434244	0.000703294	0.001302325	0.001051226	0.001114931	0.002700203	0.000608887	0.000413899	0.000662748	0.00140182	0.000460194	0.000993374	0.000893285	0.001811775
EN	0	0	120	0	110	0	0.002708052	0.000696417	0.000248985	0.000462177	0.000795863	0.001295285	0.001014035	0.001077544	0.002696621	0.000592655	0.000466769	0.000689217	0.001402666	0.000479632	0.00100463	0.000870087	0.001720258
EN	0	0	120	0	110	0	0.002683541	0.000669525	0.000228128	0.000407407	0.000757045	0.001269912	0.000962475	0.001075724	0.002649945	0.000564615	0.000426332	0.00066117	0.001384688	0.000457697	0.000995296	0.00084086	0.001817358
EN	0	0	120	0	110	0	0.002711566	0.000730901	0.000241865	0.000428558	0.000861618	0.001289013	0.001044714	0.001057297	0.002691458	0.000593873	0.00043585	0.000664382	0.001427836	0.000482239	0.001015885	0.00085896	0.001789036
EN	0	0	120	0	110	0	0.00270288	0.00080489	0.00025006	0.000468847	0.000625863	0.001324658	0.000991086	0.001107561	0.002701499	0.000603787	0.000438792	0.000669662	0.001410929	0.000462897	0.001023616	0.000877595	0.001822806
EN	0	0	120	0	110	0	0.002702633	0.000760991	0.000238431	0.000396905	0.000743085	0.001278256	0.00107029	0.001092296	0.002668304	0.00061588	0.00042868	0.0006677	0.001399652	0.000476055	0.000997368	0.000855968	0.001363885
EN	0	0	120	0	110	0	0.002692091	0.000664527	0.000251493	0.000437118	0.000805284	0.001285939	0.001000777	0.001043438	0.002663834	0.000611698	0.000457154	0.000683252	0.001405266	0.000476277	0.001011508	0.000890585	0.002068707
EN	0	0	120	0	110	0	0.002710626	0.000690282	0.000252866	0.000432185	0.00076896	0.001261772	0.000997609	0.001121397	0.002641866	0.000583907	0.000426706	0.000697192	0.001379969	0.00048252	0.000998288	0.000889174	0.001946156
EN	0	0	120	0	110	0	0.00264438	0.000685691	0.000222533	0.000388499	0.000857184	0.001302086	0.000998315	0.001041676	0.002639409	0.000577094	0.00040389	0.000684189	0.001384155	0.00046777	0.001009978	0.000875332	0.001851221
BTEN	100	100	110	0	110	0	0.00307531	0.000827787	0.00030223	0.000477866	0.000964282	0.001481242	0.001207546	0.001276668	0.003055412	0.000678361	0.000487605	0.000774534	0.001620489	0.000559112	0.001190569	0.001070603	0.002259994
BTEN	100	100	110	0	110	0	0.003001778	0.00073736	0.000286871	0.000479003	0.001003848	0.001514827	0.001167682	0.001235477	0.003011936	0.000658651	0.000467867	0.000774582	0.001598703	0.000561711	0.0011848	0.001058482	0.002170536
BTEN	100	100	110	0	110	0	0.003014419	0.00077799	0.000290259	0.000481577	0.000954234	0.001498116	0.001139307	0.001252602	0.003014183	0.000672496	0.000473694	0.000767541	0.001598489	0.000551662	0.00120151	0.001044046	0.002042206
BTEN	100	100	110	0	110	0	0.003013731	0.000770443	0.000298717	0.000491034	0.001054494	0.001499607	0.001162719	0.001218532	0.003023894	0.000675287	0.000488594	0.000787311	0.001628104	0.000536455	0.001203367	0.001042036	0.002085994
BTEN	100	100	110	0	110	0	0.003022428	0.000833169	0.000307359	0.000506495	0.000921821	0.001516519	0.001212238	0.001261325	0.003021537	0.000675518	0.000514081	0.000802289	0.001666126	0.000548825	0.001186953	0.001066884	0.002105482
BTEN	100	100	110	0	110	0	0.002994591	0.00075848	0.000311513	0.000532837	0.000951979	0.001500119	0.001129769	0.001206018	0.003007517	0.000663187	0.000516711	0.000806535	0.001657986	0.000505643	0.001191832	0.001044794	0.002161399
BTEN	100	100	110	0	110	0	0.002983357	0.000777784	0.000297297	0.00053248	0.0009858	0.001509152	0.001151159	0.001191071	0.002998589	0.000656707	0.000501188	0.000783357	0.001639791	0.000552084	0.001162734	0.001031249	0.002109796
BTEN	100	100	110	0	110	0	0.002982292	0.000828774	0.000306443	0.000515341	0.000999249	0.001519972	0.001165493	0.001242026	0.002999718	0.000681606	0.000492036	0.000763155	0.001607145	0.000552495	0.001179402	0.00103809	0.002154966
BTEN	100	100	110	0	110	0	0.002994547	0.000780411	0.000304345	0.000502656	0.001056777	0.001501571	0.001131805	0.001267952	0.00300863	0.000686519	0.000525335	0.000783475	0.001616867	0.000576441	0.001188538	0.001066053	0.002038338
BTEN	100	100	110	0	110	0	0.002950374	0.000754442	0.000289967	0.00051064	0.001013639	0.001493324	0.001174198	0.001166953	0.002975397	0.000660613	0.000468689	0.000753386	0.001602534	0.000546584	0.001189655	0.001001373	0.002033227
BTEN	100	100	110	0	110	0	0.002980519	0.000810446	0.00031919	0.000512994	0.000857139	0.001507161	0.00114138	0.001218515	0.002985645	0.000644059	0.000481853	0.000781306	0.001626755	0.000551063	0.001167662	0.00101753	0.001970216
BTEN	100	100	110	0	110	0	0.002942312	0.000723489	0.00031045	0.000540325	0.000797379	0.001514775	0.001180263	0.001217465	0.002963674	0.000651406	0.000515928	0.000779865	0.001657292	0.000588256	0.001164637	0.001031897	0.00201448
T	0	110	0	0	0	0	0.000390356	8.93E-05	4.44E-05	3.36E-05	0.000134225	0.000177419	0.000199924	0.000146519	0.000321974	0.000104899	7.56E-05	7.37E-05	0.000160663	6.73E-05	0.000187905	0.000158096	0.000158341
T	0	110	0	0	0	0	0.000401011	0.000170839	4.90E-05	6.68E-05	0.000116326	0.000208803	0.000221344	0.00014893	0.000335294	0.000113787	7.04E-05	7.75E-05	0.000153048	6.68E-05	0.000193607	0.000155774	0.000280623
T	0	110	0	0	0	0	0.000402681	0.00021886	3.12E-05	4.65E-05	5.17E-05	0.000216827	0.000168819	0.000154619	0.000346824	0.000113651	6.71E-05	0.000102037	0.00018155	5.93E-05	0.000193918	0.000166573	0.000288214
T	0	110	0	0	0	0	0.000418957	0.000108033	4.09E-05	3.83E-05	0.000113139	0.000179294	0.000172666	0.000181502	0.000329096	0.000109289	6.21E-05	8.88E-05	0.000199658	6.96E-05	0.000179712	0.00015522	0.000307109
T	0	110	0	0	0	0	0.00041847	0.000156249	5.78E-05	6.54E-05	0.000163607	0.000202002	0.000203627	0.000187266	0.000336511	0.000107224	8.37E-05	0.000117039	0.000197805	7.38E-05	0.000162143	0.00016104	0.00030691
T	0	110	0	0	0	0	0.000394361	0.000194844	4.20E-05	3.95E-05	0.000258413	0.000196366	0.000237065	0.000178712	0.000344228	0.00011621	4.01E-05	8.23E-05	0.000192329	9.63E-05	0.000177523	0.000141925	0.000312661
T	0	110	0	0	0	0	0.000407422	0.000137816	4.89E-05	6.10E-05	6.96E-05	0.000202178	0.000171006	0.000159601	0.000330745	0.000105429	3.69E-05	7.95E-05	0.000189709	6.99E-05	0.000183722	0.000148733	0.00024213
T	0	110	0	0	0	0	0.00042225	0.000117673	5.48E-05	4.48E-05	0.000260438	0.000189964	0.00021323	0.000192421	0.000357593	9.79E-05	6.46E-05	9.34E-05	0.000175688	7.42E-05	0.000166101	0.000170109	0.000238757
T	0	110	0	0	0	0	0.000378009	0.000161819	4.17E-05	6.57E-05	0.000119832	0.000201127	0.000160238	0.000201696	0.00032648	0.000115217	6.18E-05	0.000111694	0.000172562	6.67E-05	0.000169991	0.000155173	8.04E-05
T	0	110	0	0	0	0	0.000394906	0.000139225	4.37E-05	8.43E-05	7.38E-05	0.000178413	0.000170574	0.000210573	0.000340122	0.000123909	9.68E-05	8.53E-05	0.000193488	7.35E-05	0.000185534	0.000157729	0.000169571
T	0	110	0	0	0	0	0.000424677	0.000188641	4.71E-05	5.46E-05	7.93E-05	0.000181677	0.0001809	0.000211257	0.000341453	0.00010106	6.54E-05	6.75E-05	0.00015849	7.63E-05	0.000179518	0.000140383	0.000223367
T	0	110	0	0	0	0	0.00042074	0.000215304	5.68E-05	5.34E-05	0.000278362	0.000205632	0.000233029	0.0001847	0.000354313	0.00011412	6.87E-05	9.14E-05	0.000180475	0.000113025	0.000140176	0.000163962	0.000270909
