# Supplementary material for: Quantifying BTEX in aqueous solutions with potentially interfering hydrocarbons using a partially selective sensor array
Source: Royal Society of Chemistry journal article supplement (doi:10.1039/c5an00223k), 2015-01-01
Supplement: c5an00223k5.pdf [file c5an00223k5.pdf]

## SUPPLEMENTARY MATERIAL

### Quantifying BTEX in aqueous solutions with potentially interfering hydrocarbons using a partially selective sensor array

James S. Cooper<sup>a,\*</sup>, Harri Kiiveri<sup>b</sup>, Lee. J. Hubble<sup>a</sup>, Edith Chow<sup>a</sup>, Melissa S. Webster<sup>a</sup>, Karl-H. Müller<sup>a</sup>, Andrea Sosa Pintos<sup>a</sup>, Avi Bendavid<sup>a</sup>, Burkhard Raguse<sup>a</sup> and Lech Wiczorek<sup>a</sup>

<sup>a</sup>CSIRO Manufacturing Flagship, PO Box 218, Lindfield, NSW 2070, Australia

<sup>b</sup>CSIRO Computational Informatics, 65 Brockway Road, Floreat WA 6014

\*CORRESPONDING AUTHORS: PH: +61294137143, EMAIL: james.cooper@csiro.au

Table S-1 Components in the Synthetic Gasoline Mixture

|          |    | Name                    | Vol% of the component in the synthetic gasoline mixture | Solubility (mg/L) |
|----------|----|-------------------------|---------------------------------------------------------|-------------------|
| straight | 1  | <i>n</i> -pentane       | 7.5%                                                    | 40                |
|          | 2  | <i>n</i> -hexane        | 7.5%                                                    | 9.5               |
|          | 3  | <i>n</i> -heptane       | 7.5%                                                    | 3                 |
|          | 4  | cyclohexane             | 7.5%                                                    | 55                |
|          | 5  | <i>n</i> -octane        | 7.5%                                                    | 0.66              |
| branch   | 6  | isopentane              | 7.5%                                                    | 48                |
|          | 7  | 2-methylpentane         | 7.5%                                                    | 14                |
|          | 8  | 3-methylpentane         | 7.5%                                                    | 17.9              |
|          | 9  | isooctane               | 7.5%                                                    | 2                 |
|          | 10 | methylcyclopentane      | 7.5%                                                    | 42                |
| aromatic | 11 | 1,2,4-trimethylbenzene  | 7.5%                                                    | 57                |
|          | 12 | 1-methyl-3-ethylbenzene | 0.8%                                                    | 39.99             |
|          | 13 | 1,3,5-trimethylbenzene  | 7.5%                                                    | 20                |
|          | 14 | 1-methyl-4-ethylbenzene | 0.8%                                                    | 74.5              |
|          | 15 | 1,2,3-trimethylbenzene  | 7.5%                                                    | 75.2              |
| olefin   | 16 | 1-hexene                | 1.0%                                                    | 50                |

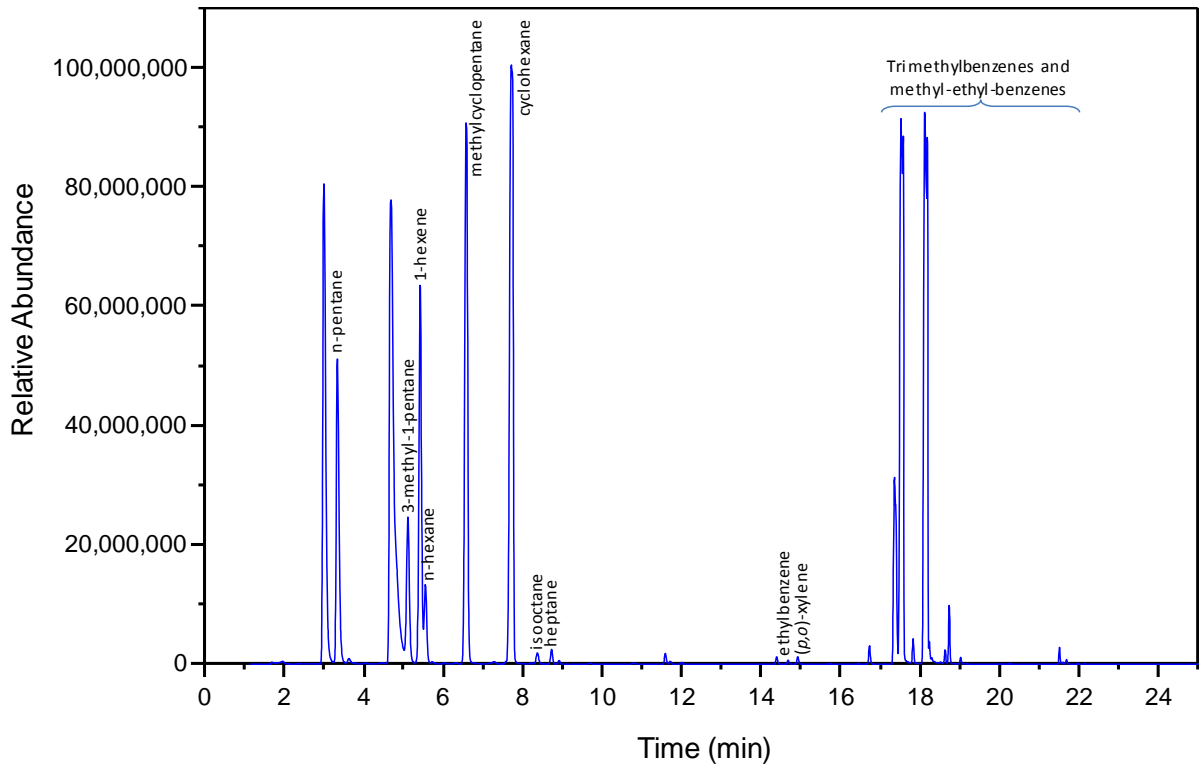

Figure S-1, GC-MS Spectra of water soluble fraction of the synthetic gasoline mixture

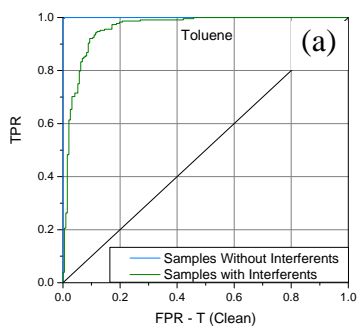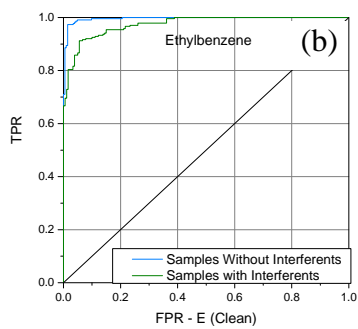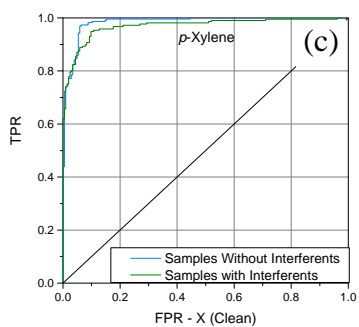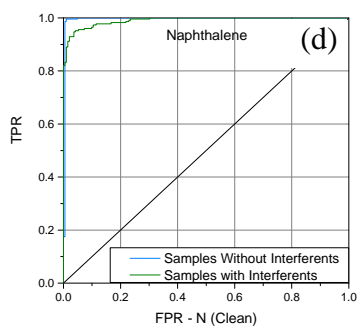

Figure S-2 ROC Curves for (a) toluene, (b) ethylbenzene, (c) *p*-xylene, (d) Naphthalene
